# Supplementary material for: Metal-free and atom-efficient protocol for diarylation of selenocyanate by diaryliodonium salts
Source: Royal Society of Chemistry journal article supplement (doi:10.1039/d3ob00833a), 2023-01-01
Supplement: d3ob00833a1.pdf [file d3ob00833a1.pdf]

## SUPPORTING INFORMATION

### Metal-free and Atom-efficient Protocol for Diarylation of Selenocyanate by Diaryliodonium Salts

Amirbek D. Radzhabov,<sup>1</sup> Natalia S. Soldatova,<sup>1\*</sup> Daniil M. Ivanov,<sup>1,2</sup> Mekhman S. Yusubov,<sup>1</sup>  
Vadim Yu. Kukushkin,<sup>2</sup> Pavel S. Postnikov<sup>1,3\*</sup>

1. Research School of Chemistry and Applied Biomedical Sciences, Tomsk Polytechnic University,  
Tomsk 634050, Russian Federation
2. Institute of Chemistry, Saint Petersburg State University, Saint Petersburg 199034, Russian  
Federation
3. Department of Solid State Engineering, Institute of Chemical Technology, Prague 16628, Czech  
Republic

\* Correspondence: [postnikov@tpu.ru](mailto:postnikov@tpu.ru), [soldatovans@tpu.ru](mailto:soldatovans@tpu.ru)

#### Table of contents:

|                                                                                                 |     |
|-------------------------------------------------------------------------------------------------|-----|
| <b>Figure S1.</b> NMR spectra of reaction mass after arylation of KSeCN by IS <b>1a</b> .....   | S2  |
| <b>Table S1.</b> Arylation of PhSeCN: control experiments. <sup>a</sup> .....                   | S3  |
| <b>Figure S2.</b> Control experiment of diselenide formation. <sup>a</sup> .....                | S3  |
| General information and synthetic procedures .....                                              | S4  |
| NMR spectra of <b>1h, m–q</b> .....                                                             | S17 |
| NMR spectra of <b>2a–k</b> .....                                                                | S35 |
| NMR spectra of <b>3a,b</b> .....                                                                | S71 |
| <b>Table S2.</b> Crystal data and structure refinement for <b>2g, 2i,</b> and <b>3b</b> . ..... | S77 |
| References .....                                                                                | S78 |

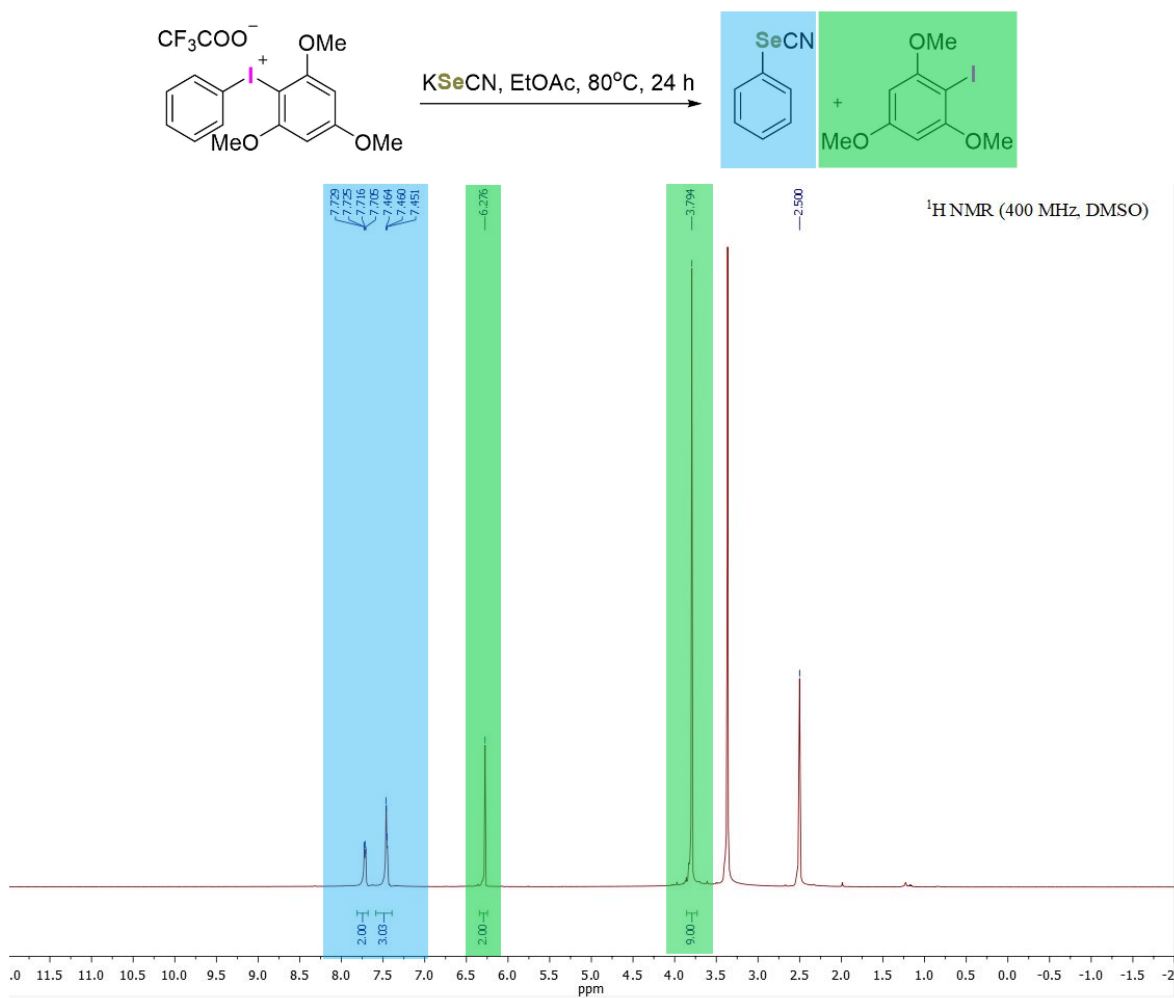

**Figure S1.** NMR spectra of reaction mass after arylation of  $\text{KSeCN}$  by IS **1a**.

**Table S1.** Arylation of PhSeCN: control experiments.<sup>a</sup>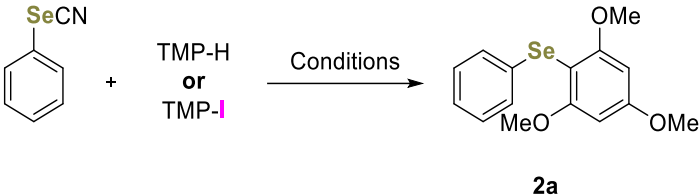

| Entry | Arene | Solvent, (solvent ratio)                   | Temperature, °C | Time, h | Yield, % <sup>b</sup> |
|-------|-------|--------------------------------------------|-----------------|---------|-----------------------|
| 1     | TMP-H | HFIP/CH <sub>2</sub> Cl <sub>2</sub> (1/1) | r.t             | 10      | trace                 |
| 2     | TMP-H | HFIP                                       | r.t             | 10      | trace                 |
| 3     | TMP-H | HFIP                                       | 60              | 1.5     | ~5                    |
| 4     | TMP-H | HFIP                                       | 60              | 24      | 15                    |
| 5     | TMP-I | HFIP                                       | r.t             | 24      | trace                 |
| 6     | TMP-I | HFIP                                       | 60              | 1.5     | <5                    |
| 7     | TMP-I | HFIP                                       | 60              | 24      | 15                    |

<sup>a</sup>Reaction conditions: phenylselenocyanate (0.25 mmol), TMP-H or TMP-I (0.3 mmol), solvent (1.5 mL);

<sup>b</sup>Isolated yield.

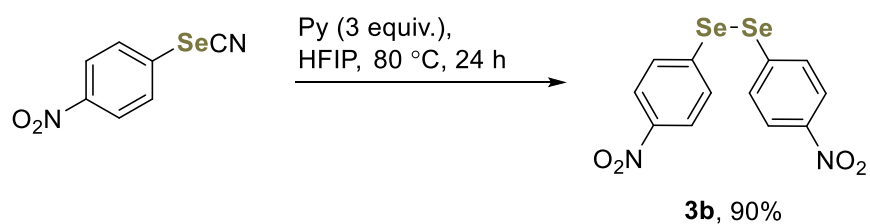

Reaction conditions: (A) 4-nitrophenylselenocyanate (1 equiv., 0.25 mmol), pyridine (3 equiv.), 24 h, 80 °C.

**Figure S2.** Control experiment of diselenide formation.<sup>a</sup>

## General information and synthetic procedures

**General information.** Reagents and solvents were obtained from commercial sources and used without further purification. HFIP was distilled and stored over the molecular sieves (4 Å). Iodonium salts were obtained by the previously reported procedures.<sup>1</sup> Thin layer chromatography (TLC) was performed using precoated plates purchased from Macherey–Nagel (silica gel 60, 0.20 mm). Column chromatography was performed on 63–200 µm silica gel purchased from Macherey–Nagel. Melting points were measured on a BUCHI M-560 apparatus in capillaries and are not corrected. NMR spectra were recorded on Bruker Avance III HD (400 MHz). <sup>1</sup>H NMR spectra were recorded at 400 MHz, <sup>13</sup>C NMR spectra were recorded at 100 MHz, <sup>77</sup>Se NMR spectra were recorded at 76 MHz and <sup>19</sup>F NMR spectra were recorded at 376 MHz. Chemical shifts are reported in parts per million (ppm). <sup>1</sup>H and <sup>13</sup>C chemical shifts are referenced relative to the residual solvent signal. High-resolution mass spectra (HRMS) were recorded using atmospheric pressure chemical ionization (APCI) and electrospray ionization (ESI) methods for **2a–k**, **3a,b** on a Shimadzu LCMS-9030 Q-TOF mass spectrometer coupled with LC-30 UHPLC system.

**X-ray structure determinations.** X-ray diffraction data were collected at 100 K on a XtaLAB Synergy, Single source at home/near, HyPix diffractometer using Cu K $\alpha$  ( $\lambda = 1.54184$  Å; **2g,i** and **3b**). The structures were solved with the ShelXT<sup>2</sup> structure solution program using Intrinsic Phasing and refined with the ShelXL<sup>3</sup> refinement package incorporated in the OLEX2 program package<sup>4</sup> using Least Squares minimization. XRD data and structural refinement parameters are summarized in **Table S2**. Hydrogen atoms in all structures are placed in ideal calculated positions accordingly to neutron diffraction statistical data<sup>5</sup> and refined as colliding atoms with parameters of relative isotropic displacement. Supplementary crystallographic data have been deposited at Cambridge Crystallographic Data Centre (CCDC structures 2250168, 2250169, 2250170) and can be obtained free of charge via [www.ccdc.cam.ac.uk/data request/cif](http://www.ccdc.cam.ac.uk/data_request/cif).

**General procedure for synthesis of diarylselenides 2a–k, 3a,b (GP1).** Screw cap tube was charged with a mixture of iodonium salt **1** (0.25 mmol, 1 equiv.) and KSeCN (40 mg, 0.275 mmol, 1.1 equiv.), whereupon EtOAc (2 mL) was added and the resulting mixture was heated to 80 °C and stirred for 24 h. The mixture was concentrated under a reduced pressure at 45 °C and pyridine (60  $\mu$ L, 3 equiv.) in previously distilled and dried over molecular sieves (4 Å) HFIP (1.5 mL) was added to the formed residue. The resulting mixture was heated at 80 °C for 24 h until the full conversion of arylselenocyanate (monitored by TLC with 8:2, v/v, hexane: EtOAc was used as eluent). The reaction mixture was then diluted with water (10 mL) and the product was extracted by dichloromethane (3 $\times$ 10 mL). Organic layers were combined, dried over Na<sub>2</sub>SO<sub>4</sub>, and concentrated under a reduced pressure at 45 °C. Selanes **2** were isolated by flash column chromatography (hexane:EtOAc 9:1, v/v).

**General procedure for the preparation of diaryliodonium trifluoroacetates 1a–n. (GP2).** Diaryliodonium trifluoroacetates **1a–q** was obtained using previously reported procedure.<sup>1</sup> In a round-bottom flask equipped with a magnetic stirring bar and condenser, aryl iodide (2.0 mmol, 1 equiv.) was dissolved in acetonitrile (2 mL). *m*CPBA (2.4 mmol, 0.538 g, 1.2 equiv.) was added in one portion, followed by the dropwise addition of trifluoroacetic acid (2 mmol, 154  $\mu$ L, 1 equiv.). The reaction was placed in an oil bath set to 55 °C and stirred 50 minutes (the reaction was monitored by TLC using hexane/EtOAc 3:1 as eluent by disappearance of the iodoarene). 1,3,5-trimethoxybenzene (2 mmol, 0.336 g, 1 equiv.) or 1,3-dimethoxybenzene (2 mmol, 0.336 g, 1 equiv.) was added and reaction mixture was stirred at 55 °C for another 15 minutes. The reaction mixture was concentrated under the reduced pressure. To the residue diethyl ether was added (15 mL) and stirred for 15 min. The precipitated trifluoroacetate salt was collected by vacuum filtration and washed with diethyl ether (3  $\times$  10 mL). The product was dried under reduced pressure.

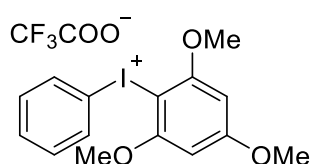

**phenyl(2,4,6-trimethoxyphenyl)iodonium trifluoroacetate (1a).**<sup>1</sup>

The reaction of iodobenzene (2 mmol, 223  $\mu$ L), *m*CPBA (77%,

2.4 mmol, 538 mg), 1,3,5-trimethoxybenzene (2 mmol, 336 mg) and trifluoroacetic acid (154  $\mu\text{L}$ ) according to procedure **GP2** afforded 881 mg (91%) as a slightly pink solid; mp 155–157  $^{\circ}\text{C}$  (mp lit. 153–155  $^{\circ}\text{C}$ ).<sup>1</sup>  $^1\text{H}$  NMR (400 MHz,  $\text{DMSO-}d_6$ )  $\delta$  7.91 (d,  $J = 7.6$  Hz, 2H), 7.61 (t,  $J = 7.4$  Hz, 1H), 7.47 (t,  $J = 7.6$  Hz, 2H), 6.46 (s, 2H), 3.94 (s, 6H), 3.87 (s, 3H).  $^{13}\text{C}\{^1\text{H}\}$  NMR (100 MHz,  $\text{DMSO-}d_6$ )  $\delta$  166.2, 159.4, 157.7 (d,  $J_{\text{C-F}} = 30$  Hz), 134.3, 131.6, 117.4 (q,  $J_{\text{C-F}} = 300$  Hz), 116.2, 92.1, 87.1, 57.3, 56.2.  $^{19}\text{F}\{^1\text{H}\}$  NMR (376 MHz,  $\text{DMSO-}d_6$ )  $\delta$  -73.4.

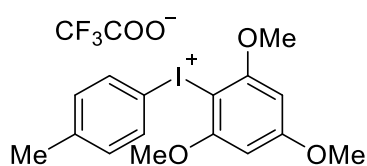

***p*-tolyl(2,4,6-trimethoxyphenyl)iodonium trifluoroacetate**

**(1b)**.<sup>1</sup> The reaction of 4-iodotoluene (2 mmol, 436 mg), *m*CPBA (77%, 2.4 mmol, 538 mg), 1,3,5-trimethoxybenzene (2 mmol, 336 mg) and trifluoroacetic acid (154  $\mu\text{L}$ ) according to procedure **GP2** afforded 935 mg (93%) as a colorless solid; mp 161–163  $^{\circ}\text{C}$  (mp lit. 161–163  $^{\circ}\text{C}$ ).<sup>1</sup>  $^1\text{H}$  NMR (400 MHz,  $\text{DMSO-}d_6$ )  $\delta$  7.79 (d,  $J = 8.4$  Hz, 2H), 7.27 (d,  $J = 8.0$  Hz, 2H), 6.45 (s, 2H), 3.94 (s, 6H), 3.86 (s, 3H), 2.32 (s, 3H).  $^{13}\text{C}\{^1\text{H}\}$  NMR (100 MHz,  $\text{DMSO-}d_6$ )  $\delta$  166.1, 159.3, 157.7 (q,  $J_{\text{C-F}} = 30$  Hz), 141.9, 134.4, 132.1, 117.4 (q,  $J_{\text{C-F}} = 300$  Hz), 112.6, 92.0, 87.3, 57.3, 56.1, 20.8.  $^{19}\text{F}\{^1\text{H}\}$  NMR (376 MHz,  $\text{DMSO-}d_6$ )  $\delta$  -73.4.

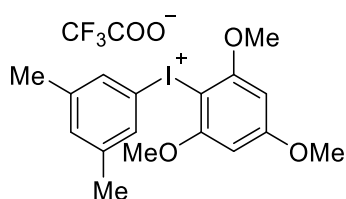

**(3,5-dimethylphenyl)(2,4,6-trimethoxyphenyl)iodonium trifluoroacetate (1c)**.<sup>1</sup>

The reaction of 1-iodo-3,5-dimethylbenzene (2 mmol, 289  $\mu\text{L}$ ), *m*CPBA (77%, 2.4 mmol, 538 mg), 1,3,5-trimethoxybenzene (2 mmol, 336 mg) and trifluoroacetic acid (154  $\mu\text{L}$ ) according to procedure **GP2** afforded 953 mg (89%) as a colorless solid; mp 186–187  $^{\circ}\text{C}$  (mp lit. 187–189  $^{\circ}\text{C}$ ).<sup>6</sup>  $^1\text{H}$  NMR (400 MHz,  $\text{DMSO-}d_6$ )  $\delta$  7.55 (s, 2H), 7.24 (s, 1H), 6.46 (s, 2H), 3.95 (s, 6H), 3.86 (s, 3H), 2.28 (s, 6H).  $^{13}\text{C}\{^1\text{H}\}$  NMR (100 MHz,  $\text{DMSO-}d_6$ )  $\delta$  166.1, 159.4, 157.6 (q,  $J_{\text{C-F}} = 30$  Hz), 141.1, 133.1, 131.8, 117.4 (q,  $J_{\text{C-F}} = 300$  Hz), 115.7, 92.1, 86.8, 57.3, 56.2, 20.7.  $^{19}\text{F}\{^1\text{H}\}$  NMR (376 MHz,  $\text{DMSO-}d_6$ )  $\delta$  -73.4.

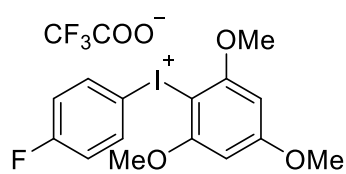

**(4-fluorophenyl)(2,4,6-trimethoxyphenyl)iodonium**

**trifluoroacetate (1d).**<sup>1</sup> The reaction of 1-fluoro-4-iodobenzene

(2 mmol, 231  $\mu$ L), *m*CPBA (77%, 2.4 mmol, 538 mg), 1,3,5-trimethoxybenzene (2 mmol, 336 mg) and trifluoroacetic acid (154  $\mu$ L) according to procedure **GP2** afforded 892 mg (88%) as a colorless solid; mp 167–169 °C (mp lit. 165–169 °C).<sup>1</sup> <sup>1</sup>H NMR (400 MHz, DMSO-*d*<sub>6</sub>)  $\delta$  7.99–7.96 (m, 2H), 7.35–7.31 (m, 2H), 6.46 (s, 2H), 3.94 (s, 6H), 3.87 (s, 3H). <sup>13</sup>C{<sup>1</sup>H} NMR (100 MHz, DMSO-*d*<sub>6</sub>)  $\delta$  166.2, 163.6 (d,  $J_{C-F}$  = 249 Hz), 159.3, 157.7 (q,  $J_{C-F}$  = 30 Hz), 137.2 (d,  $J_{C-F}$  = 9 Hz), 119.0 (d,  $J_{C-F}$  = 23 Hz), 117.0 (q,  $J_{C-F}$  = 266 Hz), 110.4 (d,  $J_{C-F}$  = 3 Hz), 92.1, 87.5, 57.4, 56.2. <sup>19</sup>F{<sup>1</sup>H} NMR (376 MHz, DMSO-*d*<sub>6</sub>)  $\delta$  -73.4, -107.5 (m).

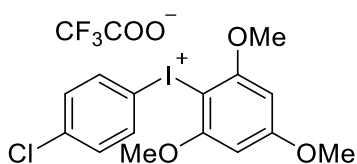

**(4-chlorophenyl)(2,4,6-trimethoxyphenyl)iodonium**

**trifluoroacetate (1e).**<sup>1</sup> The reaction of 1-chloro-4-iodobenzene

(2 mmol, 476 mg), *m*CPBA (77%, 2.4 mmol, 538 mg), 1,3,5-trimethoxybenzene (2 mmol, 336 mg) and trifluoroacetic acid (154  $\mu$ L) according to procedure **GP2** afforded 812 mg (79%) as a colorless solid; mp 168–171 °C (mp lit. 168–172 °C).<sup>1</sup> <sup>1</sup>H NMR (400 MHz, DMSO-*d*<sub>6</sub>)  $\delta$  7.91 (d,  $J$  = 8.8 Hz, 2H), 7.54 (d,  $J$  = 8.8 Hz, 2H), 6.47 (s, 2H), 3.94 (s, 6H), 3.87 (s, 3H). <sup>13</sup>C{<sup>1</sup>H} NMR (100 MHz, DMSO-*d*<sub>6</sub>)  $\delta$  166.3, 159.4, 157.7 (q,  $J_{C-F}$  = 29 Hz), 136.7, 136.1, 131.5, 117.4 (q,  $J_{C-F}$  = 300 Hz), 114.0, 92.1, 87.3, 57.4, 56.2. <sup>19</sup>F{<sup>1</sup>H} NMR (376 MHz, DMSO-*d*<sub>6</sub>)  $\delta$  -73.4.

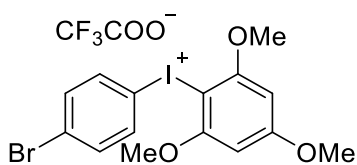

**(4-bromophenyl)(2,4,6-trimethoxyphenyl)iodonium**

**trifluoroacetate (1f).**<sup>1</sup> The reaction of 1-bromo-4-iodobenzene

(2 mmol, 566 mg), *m*CPBA (77%, 2.4 mmol, 538 mg), 1,3,5-trimethoxybenzene (2 mmol, 336 mg) and trifluoroacetic acid (154  $\mu$ L) according to procedure **GP2** afforded 910 mg (81%) as a colorless solid; mp 171–174 °C (mp lit. 171–173 °C).<sup>1</sup> <sup>1</sup>H NMR (400 MHz, DMSO-*d*<sub>6</sub>)  $\delta$  7.83 (d,  $J$  = 8.4 Hz, 2H), 7.67 (d,  $J$  = 8.8 Hz, 2H), 6.47 (s, 2H), 3.94 (s, 6H), 3.87 (s, 3H). <sup>13</sup>C{<sup>1</sup>H} NMR (100 MHz, DMSO-*d*<sub>6</sub>)  $\delta$  166.3, 159.4, 157.7 (d,  $J_{C-F}$  = 31 Hz),

136.2, 134.4, 125.5, 117.4 (d,  $J_{C-F} = 299$  Hz), 114.7, 92.1, 87.2, 57.4, 56.2.  $^{19}\text{F}\{^1\text{H}\}$  NMR (376 MHz,  $\text{DMSO-}d_6$ )  $\delta$  -73.4.

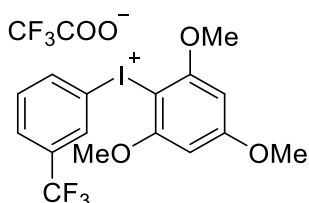

**(3-(trifluoromethyl)phenyl)(2,4,6-trimethoxyphenyl)iodonium**

**trifluoroacetate (1g).**<sup>1</sup> The reaction of 3-iodobenzotrifluoride (2 mmol, 288  $\mu\text{L}$ ), *m*CPBA (77%, 2.4 mmol, 538 mg), 1,3,5-trimethoxybenzene (2 mmol, 336 mg) and trifluoroacetic acid (154  $\mu\text{L}$ ) according

to procedure **GP2** afforded 800 mg (71%) as a colorless solid; mp 155–157 °C (mp lit. 142–144 °C).<sup>6</sup>  $^1\text{H}$  NMR (400 MHz,  $\text{DMSO-}d_6$ )  $\delta$  8.34 (s, 1H), 8.14 (d,  $J = 8.0$  Hz, 1H), 8.00 (d,  $J = 8.0$  Hz, 1H), 7.69 (t,  $J = 7.8$  Hz, 1H), 6.48 (s, 2H), 3.94 (s, 6H), 3.87 (s, 3H).  $^{13}\text{C}\{^1\text{H}\}$  NMR (100 MHz,  $\text{DMSO-}d_6$ )  $\delta$  166.4, 159.4, 157.7 (q,  $J_{C-F} = 30$  Hz), 138.1, 132.7, 131.1 (q,  $J_{C-F} = 33$  Hz), 130.8 (q,  $J_{C-F} = 4$  Hz), 128.3 (q,  $J_{C-F} = 4$  Hz), 123.0 (q,  $J_{C-F} = 272$  Hz), 117.4 (q,  $J_{C-F} = 299$  Hz), 116.4, 92.2, 87.2, 57.3, 56.2.  $^{19}\text{F}\{^1\text{H}\}$  NMR (376 MHz,  $\text{DMSO-}d_6$ )  $\delta$  -61.3, -73.4.

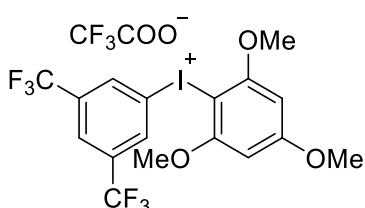

**(3,5-bis(trifluoromethyl)phenyl)(2,4,6-**

**trimethoxyphenyl)iodonium trifluoroacetate (1h).**<sup>1</sup> The reaction

of 3,5-bis(trifluoromethyl)iodobenzene (2 mmol, 465  $\mu\text{L}$ ), *m*CPBA (77%, 2.4 mmol, 538 mg), 1,3,5-trimethoxybenzene (2 mmol, 336 mg) and trifluoroacetic acid (154  $\mu\text{L}$ ) according to procedure **GP2** afforded 855 mg (69%) as a colorless solid; mp 151–153 °C.  $^1\text{H}$  NMR (400 MHz,  $\text{DMSO-}d_6$ )  $\delta$  8.60 (s, 2H), 8.44 (s, 1H), 6.49 (s, 2H), 3.94 (s, 6H), 3.87 (s, 3H).  $^{13}\text{C}\{^1\text{H}\}$  NMR (100 MHz,  $\text{DMSO-}d_6$ )  $\delta$  166.6, 159.4, 157.8 (q,  $J_{C-F} = 30$  Hz), 135.0, 132.1 (q,  $J_{C-F} = 34$  Hz), 125.7, 122.2 (q,  $J_{C-F} = 272$  Hz), 117.3, 117.3 (q,  $J_{C-F} = 299$  Hz), 92.2, 87.4, 57.3, 56.3.  $^{19}\text{F}\{^1\text{H}\}$  NMR (376 MHz,  $\text{DMSO-}d_6$ )  $\delta$  -61.3, -73.5. HRMS (ESI)  $m/z$  calcd. for  $[\text{M}]^+$   $\text{C}_{17}\text{H}_{14}\text{F}_6\text{IO}_3^+$ : 506.9889, found 506.9886.

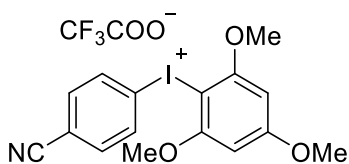

**(4-cyanophenyl)(2,4,6-trimethoxyphenyl)iodonium**

**trifluoroacetate (1i).**<sup>1</sup> The reaction of 4-iodobenzonitrile (2 mmol, 458 mg), *m*CPBA (77%, 2.4 mmol, 538 mg), 1,3,5-



trimethoxybenzene (2 mmol, 336 mg) and trifluoroacetic acid (154  $\mu$ L) according to procedure **GP2** afforded 783 mg (72%) as a colorless solid; mp 166–167  $^{\circ}$ C (mp lit. 166–167  $^{\circ}$ C).<sup>1</sup>  $^1\text{H}$  NMR (400 MHz, DMSO- $d_6$ )  $\delta$  8.06 (d,  $J$  = 8.4 Hz, 2H), 7.92 (d,  $J$  = 8.4 Hz, 2H), 6.49 (s, 2H), 3.93 (s, 6H), 3.88 (s, 3H).  $^{13}\text{C}\{^1\text{H}\}$  NMR (100 MHz, DMSO- $d_6$ )  $\delta$  166.5, 159.5, 157.9 (q,  $J_{\text{C-F}}$  = 31 Hz), 134.9, 134.8, 121.2, 117.6, 117.3 (q,  $J_{\text{C-F}}$  = 300 Hz), 114.1, 107.1, 92.2, 87.2, 57.4, 56.2.  $^{19}\text{F}\{^1\text{H}\}$  NMR (376 MHz, DMSO- $d_6$ )  $\delta$  -73.4.

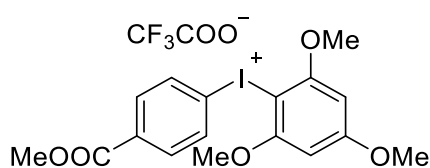

**(4-(methoxycarbonyl)phenyl)(2,4,6-**

**trimethoxyphenyl)iodonium trifluoroacetate (1j).**<sup>1</sup> The

reaction of methyl 4-iodobenzoate (2 mmol, 524 mg), *m*CPBA (77%, 2.4 mmol, 538 mg), 1,3,5-trimethoxybenzene (2 mmol, 336 mg) and trifluoroacetic acid (154  $\mu$ L) according to procedure **GP2** afforded 835 mg (77%) as a colorless solid; mp 150–153  $^{\circ}$ C (mp lit. 152–155  $^{\circ}$ C).<sup>7</sup>  $^1\text{H}$  NMR (400 MHz, DMSO- $d_6$ )  $\delta$  8.04 (d,  $J$  = 8.4 Hz, 2H), 7.97 (d,  $J$  = 8.4 Hz, 2H), 6.48 (s, 2H), 3.94 (s, 6H), 3.87 (s, 3H), 3.85 (s, 3H).  $^{13}\text{C}\{^1\text{H}\}$  NMR (100 MHz, DMSO- $d_6$ )  $\delta$  166.4, 165.2, 159.4, 157.8 (q,  $J_{\text{C-F}}$  = 30 Hz), 134.6, 132.1, 131.8, 121.1, 117.4 (q,  $J_{\text{C-F}}$  = 300 Hz), 92.2, 87.1, 57.4, 56.2, 52.7.  $^{19}\text{F}\{^1\text{H}\}$  NMR (376 MHz, DMSO- $d_6$ )  $\delta$  -73.4.

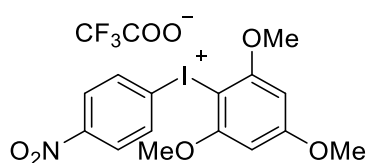

**(4-nitrophenyl)(2,4,6-trimethoxyphenyl)iodonium**

**trifluoroacetate (1k).**<sup>1</sup> The reaction of 1-iodo-4-nitrobenzene

(2 mmol, 498 mg), *m*CPBA (77%, 2.4 mmol, 538 mg), 1,3,5-trimethoxybenzene (2 mmol, 336 mg) and trifluoroacetic acid (154  $\mu$ L) according to procedure **GP2** afforded 518 mg (45%) as a colorless solid; mp 143–144  $^{\circ}$ C (mp lit. 144–147  $^{\circ}$ C).<sup>7</sup>  $^1\text{H}$  NMR (400 MHz, DMSO- $d_6$ )  $\delta$  8.23 (d,  $J$  = 9.2 Hz, 2H), 8.14 (d,  $J$  = 9.2 Hz, 2H), 6.49 (s, 2H), 3.94 (s, 6H), 3.88 (s, 3H).  $^{13}\text{C}\{^1\text{H}\}$  NMR (100 MHz, DMSO- $d_6$ )  $\delta$  166.5, 159.5, 157.7 (q,  $J_{\text{C-F}}$  = 30 Hz), 149.1, 135.4, 126.1, 122.5, 117.4 (q,  $J_{\text{C-F}}$  = 299 Hz), 92.2, 87.2, 57.5, 56.3.  $^{19}\text{F}\{^1\text{H}\}$  NMR (376 MHz, DMSO- $d_6$ )  $\delta$  -73.4.

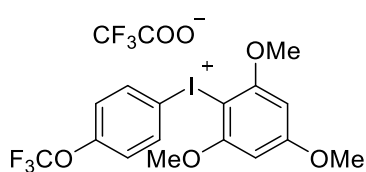

**(4-(trifluoromethoxy)phenyl)(2,4,6-trimethoxyphenyl)iodonium trifluoroacetate (11).**<sup>1</sup> The reaction

of 1-iodo-4-(trifluoromethoxy)benzene (2 mmol, 576 mg), *m*CPBA (77%, 2.4 mmol, 538 mg), 1,3,5-trimethoxybenzene (2 mmol, 336 mg) and trifluoroacetic acid (154  $\mu$ L) according to procedure **GP2** afforded 518 mg (45%) as a colorless solid; mp 142–144  $^{\circ}$ C (mp lit. 144–147  $^{\circ}$ C).<sup>6</sup>  $^1\text{H}$  NMR (400 MHz, DMSO-*d*<sub>6</sub>)  $\delta$  8.04 (d,  $J$  = 8.8 Hz, 2H), 7.48 (d,  $J$  = 8.4 Hz, 2H), 6.48 (s, 2H), 3.95 (s, 6H), 3.87 (s, 3H).  $^{13}\text{C}\{^1\text{H}\}$  NMR (100 MHz, DMSO-*d*<sub>6</sub>)  $\delta$  166.3, 159.4, 157.7 (q,  $J_{\text{C-F}}$  = 30 Hz), 150.2 (d,  $J_{\text{C-F}}$  = 2 Hz), 136.7, 123.9, 119.9 (q,  $J_{\text{C-F}}$  = 256 Hz), 117.4 (q,  $J_{\text{C-F}}$  = 300 Hz), 113.8, 92.1, 87.3, 57.4, 56.2.  $^{19}\text{F}\{^1\text{H}\}$  NMR (376 MHz, DMSO-*d*<sub>6</sub>)  $\delta$  -56.9, -73.4.

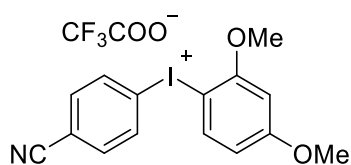

**(4-cyanophenyl)(2,4-dimethoxyphenyl)iodonium trifluoroacetate (1m).**<sup>1</sup> The reaction of 4-iodobenzonitrile (2 mmol,

458 mg), *m*CPBA (77%, 2.4 mmol, 538 mg), 1,3-dimethoxybenzene (2 mmol, 262  $\mu$ L) and trifluoroacetic acid (154  $\mu$ L) according to procedure **GP2** afforded 713 mg (70%) as a colorless solid; mp 128–130  $^{\circ}$ C.  $^1\text{H}$  NMR (400 MHz, Acetone-*d*<sub>6</sub>)  $\delta$  8.29 (d,  $J$  = 8.4 Hz, 2H), 8.18 (d,  $J$  = 8.8 Hz, 1H), 7.85 (d,  $J$  = 8.4 Hz, 2H), 6.79 (d,  $J$  = 2.4 Hz, 1H), 6.69 (dd,  $J_1$  = 8.8 Hz,  $J_2$  = 2.4 Hz, 1H), 3.96 (s, 3H), 3.89 (s, 3H).  $^{13}\text{C}\{^1\text{H}\}$  NMR (100 MHz, Acetone-*d*<sub>6</sub>)  $\delta$  166.3, 161.0 (q,  $J_{\text{C-F}}$  = 33 Hz), 160.0, 139.7, 136.2, 135.2, 123.2, 118.2, 117.8 (q,  $J_{\text{C-F}}$  = 295 Hz), 115.7, 109.7, 100.5, 98.2, 57.5, 56.4.  $^{19}\text{F}\{^1\text{H}\}$  NMR (376 MHz, Acetone-*d*<sub>6</sub>)  $\delta$  -73.4.

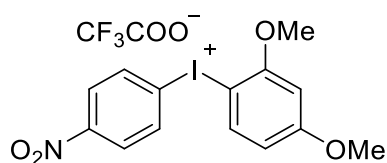

**(4-nitrophenyl)(2,4-dimethoxyphenyl)iodonium trifluoroacetate (1n).**<sup>1</sup> The reaction of 1-iodo-4-nitrobenzene

(2 mmol, 498 mg), *m*CPBA (77%, 2.4 mmol, 538 mg), 1,3-dimethoxybenzene (2 mmol, 262  $\mu$ L) and trifluoroacetic acid (154  $\mu$ L) according to procedure **GP2** afforded 494 mg (64%) as a colorless solid; mp 141–143  $^{\circ}$ C.  $^1\text{H}$  NMR (400 MHz, DMSO-*d*<sub>6</sub>)  $\delta$  8.30–8.20 (m, 5H), 6.82 (d,  $J$  = 2.4 Hz, 1H), 6.72 (dd,  $J_1$  = 8.8,  $J_2$  = 2.4 Hz, 1H), 3.92 (s, 3H), 3.84 (s, 3H).  $^{13}\text{C}\{^1\text{H}\}$  NMR (100 MHz, DMSO-*d*<sub>6</sub>)  $\delta$  165.0, 158.3, 157.8 (q,  $J_{\text{C-F}}$  = 30 Hz), 149.2, 138.6,

135.8, 126.0, 122.7, 117.3 (q,  $J_{C-F} = 299$  Hz), 109.1, 99.8, 96.2, 57.2, 56.1.  $^{19}\text{F}\{^1\text{H}\}$  NMR (376 MHz, DMSO- $d_6$ )  $\delta -73.4$ . HRMS (ESI)  $m/z$  calcd. for  $[\text{M} - \text{CF}_3\text{COO}^-]^+ \text{C}_{14}\text{H}_{13}\text{INO}_4^+$ : 385.9884, found 385.9886.

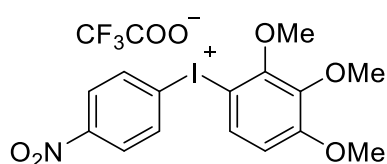

**(4-nitrophenyl)(2,3,4-trimethoxyphenyl)iodonium trifluoroacetate (10).**<sup>1</sup> The reaction of 1-iodo-4-nitrobenzene (2 mmol, 498 mg), *m*CPBA (77%, 2.4 mmol, 538 mg), 1,2,3-trimethoxybenzene (2 mmol, 336 mg) and trifluoroacetic acid (154  $\mu\text{L}$ ) according to procedure

**GP2** afforded 772 mg (73%) as a colorless solid; mp 139–141  $^\circ\text{C}$ .  $^1\text{H}$  NMR (400 MHz, DMSO- $d_6$ )  $\delta$  8.33 (d,  $J = 8.8$  Hz, 2H), 8.28 (d,  $J = 9.2$  Hz, 2H), 8.10 (d,  $J = 9.2$  Hz, 1H), 7.04 (d,  $J = 8.8$  Hz, 1H), 3.90 (s, 3H), 3.87 (s, 3H), 3.76 (s, 3H).  $^{13}\text{C}\{^1\text{H}\}$  NMR (100 MHz, DMSO- $d_6$ )  $\delta$  158.4, 157.9 (q,  $J_{C-F} = 30$  Hz), 151.5, 149.3, 141.2, 136.0, 132.1, 126.2, 123.0, 117.3 (q,  $J_{C-F} = 299$  Hz), 110.7, 103.0, 62.1, 60.9, 56.6.  $^{19}\text{F}\{^1\text{H}\}$  NMR (376 MHz, DMSO- $d_6$ )  $\delta -73.4$ .

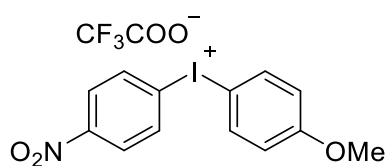

**(4-methoxyphenyl)(4-nitrophenyl)iodonium trifluoroacetate (1p).**<sup>1</sup> The reaction of 1-iodo-4-nitrobenzene (2 mmol, 498 mg), *m*CPBA (77%, 2.4 mmol, 538 mg), anisole (2 mmol, 217  $\mu\text{L}$ ) and trifluoroacetic acid (154  $\mu\text{L}$ ) according to procedure

**GP2** afforded 486 mg (52%) as a colorless solid; mp 147–148  $^\circ\text{C}$ .  $^1\text{H}$  NMR (400 MHz, DMSO- $d_6$ )  $\delta$  8.42 (d,  $J = 8.4$  Hz, 2H), 8.29 (d,  $J = 8.4$  Hz, 2H), 8.23 (d,  $J = 8.4$  Hz, 2H), 7.09 (d,  $J = 8.4$  Hz, 2H), 3.80 (s, 3H).  $^{13}\text{C}\{^1\text{H}\}$  NMR (100 MHz, DMSO- $d_6$ )  $\delta$  162.2, 157.9 (q,  $J_{C-F} = 30$  Hz), 149.3, 137.6, 136.0, 126.1, 123.4, 117.6, 117.3 (q,  $J_{C-F} = 299$  Hz), 105.9, 55.8.  $^{19}\text{F}\{^1\text{H}\}$  NMR (376 MHz, DMSO- $d_6$ )  $\delta -73.4$ .

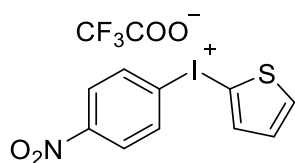

**(4-nitrophenyl)(thiophen-2-yl)iodonium trifluoroacetate (1q).**<sup>1</sup> The reaction of 1-iodo-4-nitrobenzene (2 mmol, 538 mg), *m*CPBA (77%, 2.4 mmol, 538 mg), thiophene (2 mmol, 162  $\mu\text{L}$ ) and trifluoroacetic acid

(154  $\mu\text{L}$ ) according to procedure **GP2** afforded 427 mg (48%) as a colorless solid; mp 122–123  $^\circ\text{C}$ .  $^1\text{H}$  NMR (400 MHz, DMSO- $d_6$ )  $\delta$  8.49 (d,  $J = 8.4$  Hz, 2H), 8.30 (d,  $J = 8.4$  Hz, 2H), 8.13 (d,  $J = 3.2$  Hz, 1H), 7.99 (d,  $J = 5.2$  Hz, 1H), 7.20 (t,  $J = 4.4$  Hz, 1H).  $^{13}\text{C}\{^1\text{H}\}$  NMR (100 MHz, DMSO-

$d_6$ )  $\delta$ : 157.9 (q,  $J_{C-F}$  = 30 Hz), 140.3, 137.2, 134.6, 132.0, 131.7, 129.6, 119.6, 117.3 (q,  $J_{C-F}$  = 299 Hz), 101.2.  $^{19}\text{F}\{^1\text{H}\}$  NMR (376 MHz, DMSO- $d_6$ )  $\delta$  -73.5.

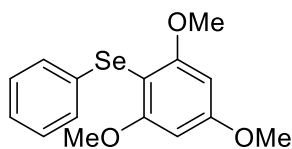

**phenyl(2,4,6-trimethoxyphenyl)selane (2a)**.<sup>8</sup> The reaction of phenyl(2,4,6-trimethoxyphenyl)iodonium trifluoroacetate **1a** (0.25 mmol, 121 mg) according to general procedure **GP1** afforded

58 mg (73%) of **2a** isolated as the colorless crystalline solid; mp 105–107 °C (lit. yellow oil<sup>8</sup>).  $^1\text{H}$  NMR (400 MHz,  $\text{CDCl}_3$ )  $\delta$  7.19–7.08 (m, 5H), 6.21 (s, 2H), 3.87 (s, 3H), 3.79 (s, 6H).  $^{13}\text{C}\{^1\text{H}\}$  (100 MHz,  $\text{CDCl}_3$ )  $\delta$  163.1, 162.0, 133.7, 128.8, 125.4, 97.1, 91.2, 56.4, 55.6.  $^{77}\text{Se}\{^1\text{H}\}$  NMR (76 MHz,  $\text{CDCl}_3$ )  $\delta$  224.4. HRMS (ESI)  $m/z$  calcd. for  $[\text{M}+\text{Na}]^+$   $\text{C}_{15}\text{H}_{16}\text{NaO}_3\text{Se}^+$ : 347.0157, found 347.0157.

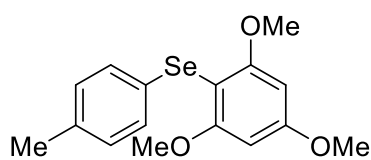

**p-tolyl(2,4,6-trimethoxyphenyl)selane (2b)**.<sup>8</sup> The reaction of *p*-tolyl(2,4,6-trimethoxyphenyl)iodonium trifluoroacetate **1b** (0.25 mmol, 125 mg) according to general procedure **GP1**

afforded 32 mg (37%) of **2b** isolated as colorless oil (lit.<sup>8</sup> yellow oil).  $^1\text{H}$  NMR (400 MHz,  $\text{CDCl}_3$ )  $\delta$  7.10 (d,  $J$  = 6.8 Hz, 2H), 6.95 (d,  $J$  = 7.6 Hz, 2H), 6.19 (s, 2H), 3.86 (s, 3H), 3.79 (s, 6H), 2.25 (s, 3H).  $^{13}\text{C}\{^1\text{H}\}$  (100 MHz,  $\text{CDCl}_3$ )  $\delta$  163.0, 162.0, 135.2, 129.7, 129.7, 129.3, 97.7, 91.2, 56.4, 55.5, 21.1.  $^{77}\text{Se}\{^1\text{H}\}$  NMR (76 MHz,  $\text{CDCl}_3$ )  $\delta$  157.4. HRMS (ESI)  $m/z$  calcd. for  $[\text{M}]^+$   $\text{C}_{16}\text{H}_{18}\text{O}_3\text{Se}^+$ : 338.0416, found 338.0416.

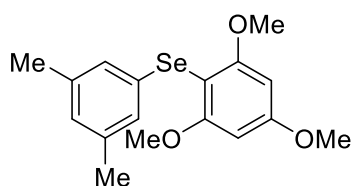

**(3,5-dimethylphenyl)(2,4,6-trimethoxyphenyl)selane (2c)**. The reaction of (3,5-dimethylphenyl)(2,4,6-trimethoxyphenyl)iodonium trifluoroacetate **1c** (0.25 mmol, 128 mg) according to general

procedure **GP1** afforded 32 mg (26%) of **2c** isolated as a colorless solid; mp 102–104 °C.  $^1\text{H}$  NMR (400 MHz,  $\text{CDCl}_3$ )  $\delta$  6.80 (s, 2H), 6.71 (s, 1H), 6.20 (s, 2H), 3.87 (s, 3H), 3.79 (s, 6H), 2.19 (s, 6H).  $^{13}\text{C}\{^1\text{H}\}$  (100 MHz,  $\text{CDCl}_3$ )  $\delta$  163.0, 162.1, 138.3, 133.1, 127.4, 126.5, 97.4, 91.3, 56.5, 21.4.  $^{77}\text{Se}\{^1\text{H}\}$  NMR (76 MHz,  $\text{CDCl}_3$ )  $\delta$  219.7. HRMS (APCI)  $m/z$  calcd. for  $[\text{M}+\text{H}]^+$   $\text{C}_{17}\text{H}_{21}\text{O}_3\text{Se}^+$ : 353.0656, found 353.0651.

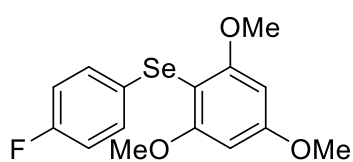

**(4-fluorophenyl)(2,4,6-trimethoxyphenyl)selane (2d).**

The reaction of (4-fluorophenyl)(2,4,6-trimethoxyphenyl)iodonium trifluoroacetate **1d** (0.25 mmol, 126 mg) according to general procedure **GP1** afforded 34 mg (40%) of **2d** isolated as the colorless solid; mp 80–81 °C.  $^1\text{H}$  NMR (400 MHz,  $\text{CDCl}_3$ )  $\delta$  7.22–7.17 (m, 2H), 6.83–6.87 (m, 2H), 6.19 (s, 2H), 3.86 (s, 3H), 3.79 (s, 6H).  $^{13}\text{C}\{^1\text{H}\}$  (100 MHz,  $\text{CDCl}_3$ )  $\delta$  163.1, 161.8, 161.6 (d,  $J_{\text{C-F}} = 242$  Hz), 131.2 (d,  $J_{\text{C-F}} = 8$  Hz), 127.8 (d,  $J_{\text{C-F}} = 3$  Hz), 115.9 (d,  $J_{\text{C-F}} = 21$  Hz), 97.7, 91.2, 56.4, 55.5.  $^{19}\text{F}\{^1\text{H}\}$  NMR (376 MHz,  $\text{CDCl}_3$ )  $\delta$  -117.7.  $^{77}\text{Se}\{^1\text{H}\}$  NMR (76 MHz,  $\text{CDCl}_3$ )  $\delta$  223.1. HRMS (APCI)  $m/z$  calcd. for  $[\text{M}+\text{H}]^+$   $\text{C}_{15}\text{H}_{16}\text{FO}_3\text{Se}^+$ : 343.0249, found 343.0245.

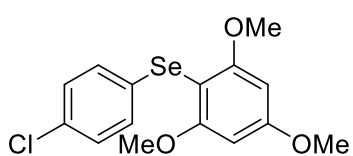

**(4-chlorophenyl)(2,4,6-trimethoxyphenyl)selane (2e).**

The reaction of (4-chlorophenyl)(2,4,6-trimethoxyphenyl)iodonium trifluoroacetate **1e** (0.25 mmol, 130 mg) according to general procedure **GP1** afforded 50 mg (57%) of **2e** isolated as the colorless solid; mp 92–94 °C.  $^1\text{H}$  NMR (400 MHz,  $\text{CDCl}_3$ )  $\delta$  7.14 – 7.05 (m, 4H), 6.20 (s, 2H), 3.87 (s, 3H), 3.79 (s, 6H).  $^{13}\text{C}\{^1\text{H}\}$  NMR (100 MHz,  $\text{CDCl}_3$ )  $\delta$  163.3, 161.9, 132.1, 131.3, 130.3, 128.9, 96.9, 91.3, 56.4, 55.6.  $^{77}\text{Se}\{^1\text{H}\}$  NMR (76 MHz,  $\text{CDCl}_3$ )  $\delta$  227.2. HRMS (APCI)  $m/z$  calcd. for  $[\text{M}+\text{H}]^+$   $\text{C}_{15}\text{H}_{16}\text{ClO}_3\text{Se}^+$ : 358.9953, found 358.9946.

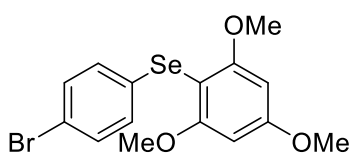

**(4-bromophenyl)(2,4,6-trimethoxyphenyl)selane (2f).**<sup>8</sup>

The reaction of (4-bromophenyl)(2,4,6-trimethoxyphenyl)iodonium trifluoroacetate **1f** (0.25 mmol, 141 mg) according to general procedure **GP1** afforded 69 mg (68%) of **2f** isolated as a colorless solid; mp 108–109 °C from hexane: EtOAc (mp lit.<sup>8</sup> 100–102 °C from hexane: EtOAc). HRMS (APCI)  $m/z$  calcd. for  $[\text{M}+\text{H}]^+$   $\text{C}_{15}\text{H}_{16}\text{BrO}_3\text{Se}^+$ : 402.9443, found 402.9438. The formation and purity of **2f** was confirm by GCMS (EI)  $m/z$  402 that was process instantly after isolation of **2f**.

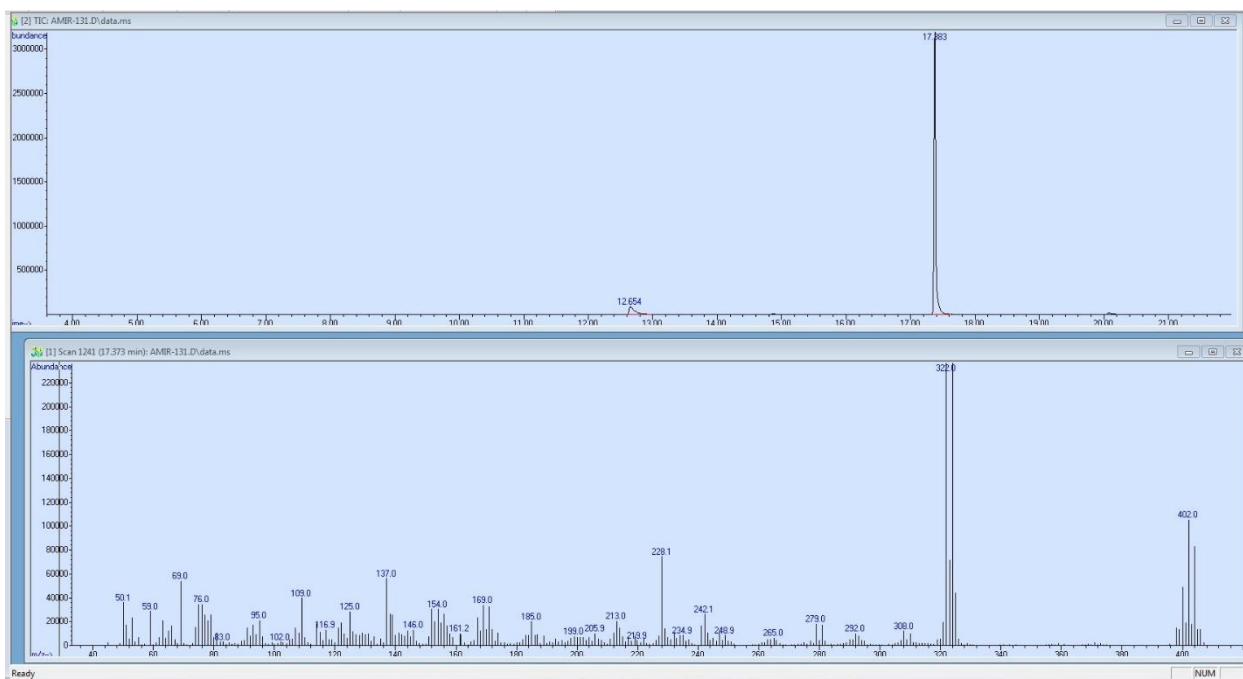

**Figure S3.** Chromatogram and mass spectrum of **2f**.

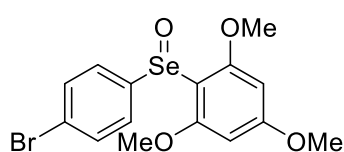

$^1\text{H}$  NMR (400 MHz,  $\text{CDCl}_3$ )  $\delta$  7.61–7.56 (m, 4H), 6.04 (s, 2H), 3.81 (s, 3H), 3.68 (s, 6H).  $^{13}\text{C}\{^1\text{H}\}$  NMR (100 MHz,  $\text{CDCl}_3$ )  $\delta$  165.3, 161.9, 141.0, 131.8, 128.1, 124.4, 110.6, 91.4, 56.1, 55.7.  $^{77}\text{Se}\{^1\text{H}\}$  NMR (76 MHz,  $\text{CDCl}_3$ )  $\delta$  839.8. Compound **2f** is unstable on air and during storage undergoes oxidation to corresponding selenoxide. An  $^{77}\text{Se}\{^1\text{H}\}$  NMR spectra revealed chemical shift of selenoxide on 839.8 ppm.<sup>9</sup> Additionally, the molecular ion of selenoxide was detected in HRMS (APCI) spectra of **2f**:  $m/z$  calcd.  $[\text{M}_{\text{selenoxide}}+\text{H}]^+$   $\text{C}_{15}\text{H}_{16}\text{BrO}_4\text{Se}^+$ : 418.9392, found 418.9386.

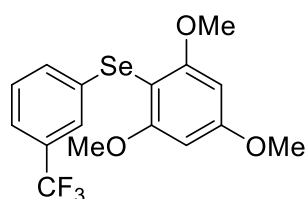

**(3-trifluoromethyl)phenyl)(2,4,6-trimethoxyphenyl)selane (2g)**. The reaction of (3-(trifluoromethyl)phenyl)(2,4,6-trimethoxyphenyl)iodonium trifluoroacetate **1g** (0.25 mmol, 138 mg) according to general procedure **GP1** afforded 24 mg (23%) of **2g** isolated as a colorless solid; mp 113–114 °C.  $^1\text{H}$  NMR (400 MHz,  $\text{CDCl}_3$ )  $\delta$  7.43 (s, 1H), 7.33 (d,  $J = 7.6$  Hz 2H), 7.23 (t,  $J = 7.8$  Hz, 1H), 6.22 (s, 2H), 3.88 (s, 3H), 3.79 (s, 6H).  $^{13}\text{C}\{^1\text{H}\}$  NMR (100 MHz,  $\text{CDCl}_3$ )  $\delta$  163.5, 161.9, 135.0, 131.9 (q,  $J_{\text{C-F}} = 1.1$  Hz), 131.0 (q,  $J_{\text{C-F}} = 32$  Hz), 129.0, 125.5 (q,  $J_{\text{C-F}} = 4$  Hz), 124.0 (q,  $J_{\text{C-F}} = 271$  Hz), 122.1 (q,  $J_{\text{C-F}} = 4$  Hz), 96.1, 91.3, 56.4, 55.6.  $^{19}\text{F}\{^1\text{H}\}$  NMR (376 MHz,  $\text{CDCl}_3$ )  $\delta$

-62.7.  $^{77}\text{Se}\{^1\text{H}\}$  NMR (76 MHz,  $\text{CDCl}_3$ )  $\delta$  239.2. HRMS (APCI)  $m/z$  calcd. for  $[\text{M}+\text{H}]^+$   $\text{C}_{16}\text{H}_{16}\text{F}_3\text{O}_3\text{Se}^+$ : 393.0217, found 393.0212.

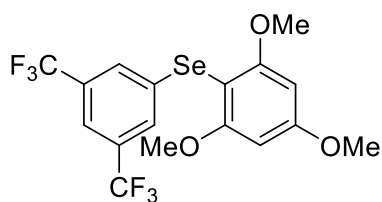

**(3,5-bis(trifluoromethyl)phenyl)(2,4,6-trimethoxyphenyl)selane (2h).** The reaction of (3,5-

bis(trifluoromethyl)phenyl)(2,4,6-trimethoxyphenyl)iodonium trifluoroacetate **1h** (0.25 mmol, 155 mg) according to general procedure **GP1** afforded 62 mg (54%) of **2h** isolated as the light yellow solid; mp 103–104 °C.  $^1\text{H}$  NMR (400 MHz,  $\text{CDCl}_3$ )  $\delta$  7.52–7.59 (m, 3H), 6.23 (s, 2H), 3.89 (s, 3H), 3.80 (s, 6H).  $^{13}\text{C}\{^1\text{H}\}$  NMR (100 MHz,  $\text{CDCl}_3$ )  $\delta$  163.9, 161.8, 137.1, 131.6 (q,  $J_{\text{C-F}} = 33$  Hz), 128.5 (m), 123.3 (q,  $J_{\text{C-F}} = 271.3$  Hz), 119.0 (m), 94.9, 91.4, 56.3, 55.6.  $^{19}\text{F}\{^1\text{H}\}$  NMR (376 MHz,  $\text{CDCl}_3$ )  $\delta$  -63.0.  $^{77}\text{Se}\{^1\text{H}\}$  NMR (76 MHz,  $\text{CDCl}_3$ )  $\delta$  257.3. HRMS (APCI)  $m/z$  calcd. for  $[\text{M}+\text{H}]^+$   $\text{C}_{15}\text{H}_{16}\text{NO}_5\text{Se}^+$ : 461.0091, found 461.0088.

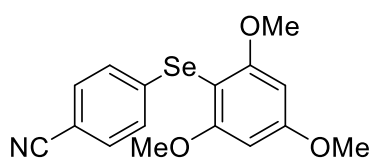

**4-((2,4,6-trimethoxyphenyl)selanyl)benzonitrile (2i).** The

reaction of (4-cyanophenyl)(2,4,6-trimethoxyphenyl)iodonium trifluoroacetate **1i** (0.25 mmol, 127 mg) according to general procedure **GP1** afforded 73 mg (83%) of **2i** isolated as a pale yellow solid; mp 128–130 °C.  $^1\text{H}$  NMR (400 MHz,  $\text{CDCl}_3$ )  $\delta$  7.37 (d,  $J = 8.4$  Hz, 2H), 7.18 (d,  $J = 8.8$  Hz, 2H), 6.23 (s, 2H), 3.89 (s, 3H), 3.79 (s, 6H).  $^{13}\text{C}\{^1\text{H}\}$  NMR (100 MHz,  $\text{CDCl}_3$ )  $\delta$  163.8, 162.0, 142.4, 132.1, 128.3, 119.5, 108.2, 95.0, 91.3, 56.4, 55.6.  $^{77}\text{Se}\{^1\text{H}\}$  NMR (76 MHz,  $\text{CDCl}_3$ )  $\delta$  253.7. HRMS (APCI)  $m/z$  calcd. for  $[\text{M}+\text{H}]^+$   $\text{C}_{16}\text{H}_{16}\text{NO}_3\text{Se}^+$ : 350.0295, found 350.0291.

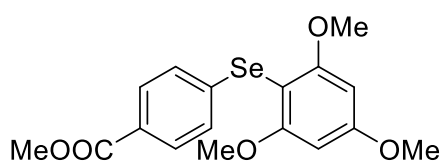

**methyl 4-((2,4,6-trimethoxyphenyl)selanyl)benzoate (2j).**

The reaction of (4-(methoxycarbonyl)phenyl)(2,4,6-trimethoxyphenyl)iodonium trifluoroacetate **1j** (0.25 mmol, 136 mg) according to general procedure **GP1** afforded 73 mg (76%) of **2j** isolated as a colorless solid; mp 125–127 °C.  $^1\text{H}$  NMR (400 MHz,  $\text{CDCl}_3$ )  $\delta$  7.77 (d,  $J = 8.4$  Hz, 2H), 7.17 (d,  $J = 8.4$  Hz, 2H), 6.23 (s, 2H), 3.89 (s, 3H), 3.86 (s, 3H), 3.79 (s, 6H).  $^{13}\text{C}\{^1\text{H}\}$  NMR (100 MHz,  $\text{CDCl}_3$ )  $\delta$  167.3, 163.5, 162.0, 141.6, 129.8, 127.7, 126.9, 95.7, 91.3, 56.4, 55.6, 52.1.  $^{77}\text{Se}\{^1\text{H}\}$  NMR (76

MHz, CDCl<sub>3</sub>)  $\delta$  242.5. HRMS (ESI)  $m/z$  calcd. for [M+H]<sup>+</sup> C<sub>16</sub>H<sub>16</sub>NO<sub>3</sub>Se<sup>+</sup>: 383.0398, found 383.0392.

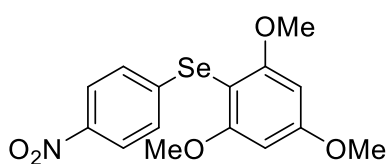

**(4-nitrophenyl)(2,4,6-trimethoxyphenyl)selane (2k)**. The reaction of (4-nitrophenyl)(2,4,6-trimethoxyphenyl)iodonium trifluoroacetate **1k** (0.25 mmol, 132 mg) according to general

procedure **GP1** afforded 85 mg (92%) of **2k** isolated as a bright yellow solid; mp 134–135 °C. <sup>1</sup>H NMR (400 MHz, CDCl<sub>3</sub>)  $\delta$  7.97 (d,  $J$  = 9.2 Hz, 2H), 7.21 (d,  $J$  = 9.2 Hz, 2H), 6.24 (s, 2H), 3.90 (s, 3H), 3.80 (s, 6H). <sup>13</sup>C{<sup>1</sup>H} NMR (100 MHz, CDCl<sub>3</sub>)  $\delta$  163.9, 162.0, 145.6, 145.5, 127.9, 123.7, 94.9, 91.3, 56.5, 55.7. <sup>77</sup>Se{<sup>1</sup>H} NMR (76 MHz, CDCl<sub>3</sub>)  $\delta$  260.0. HRMS (APCI)  $m/z$  calcd. for [M+H]<sup>+</sup> C<sub>15</sub>H<sub>16</sub>NO<sub>5</sub>Se<sup>+</sup>: 370.0194, found 370.0189.

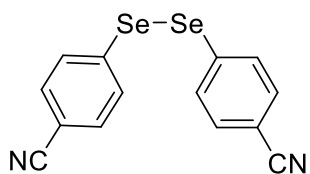

**4,4'-diselanediyldibenzonitrile (3a)**.<sup>10</sup> The reaction of (4-cyanophenyl)(2,4-dimethoxyphenyl)iodonium trifluoroacetate **1m** (0.25 mmol, 120 mg) according to general procedure **GP1** afforded

34 mg (76%) of **3a** isolated as a brown solid; mp 152–154 °C (mp lit.<sup>10</sup> 156–158 °C). <sup>1</sup>H NMR (400 MHz, CDCl<sub>3</sub>)  $\delta$  7.68 (d,  $J$  = 8.0 Hz, 4H), 7.54 (d,  $J$  = 8.0 Hz, 4H). <sup>13</sup>C{<sup>1</sup>H} NMR (100MHz, CDCl<sub>3</sub>)  $\delta$  136.5, 132.8, 130.7, 118.3, 111.5. <sup>77</sup>Se{<sup>1</sup>H} NMR (76 MHz, CDCl<sub>3</sub>)  $\delta$  456.0. HRMS (ESI)  $m/z$  calcd. for [M]<sup>+</sup> C<sub>14</sub>H<sub>8</sub>N<sub>2</sub>NaSe<sub>2</sub><sup>+</sup>: 386.8910, found 386.8913.

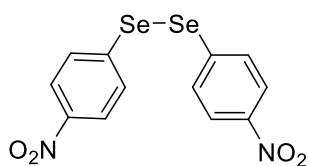

**1,2-bis(4-nitrophenyl)diselane (3b)**.<sup>11</sup> The reaction of (4-nitrophenyl)(2,4-dimethoxyphenyl)iodonium trifluoroacetate **1n** (0.25 mmol, 125 mg) according to general procedure **GP1** afforded

45 mg (89%) of **3b** isolated as a brown solid; mp 179–181 °C (mp lit.<sup>11</sup> 179–180 °C). <sup>1</sup>H NMR (400 MHz, CDCl<sub>3</sub>)  $\delta$  8.13 (d,  $J$  = 8.8 Hz, 4H), 7.75 (d,  $J$  = 8.8 Hz, 4H). <sup>13</sup>C{<sup>1</sup>H} NMR (100 MHz, CDCl<sub>3</sub>)  $\delta$  147.5, 138.7, 130.5, 124.4. <sup>77</sup>Se{<sup>1</sup>H} NMR (76 MHz, CDCl<sub>3</sub>)  $\delta$  456.2. HRMS (ESI)  $m/z$  calcd. for [M]<sup>+</sup> C<sub>12</sub>H<sub>8</sub>N<sub>2</sub>O<sub>4</sub>Se<sub>2</sub><sup>+</sup>: 403.8815, found 403.8812.



NMR spectra of **1h**, **m–q**

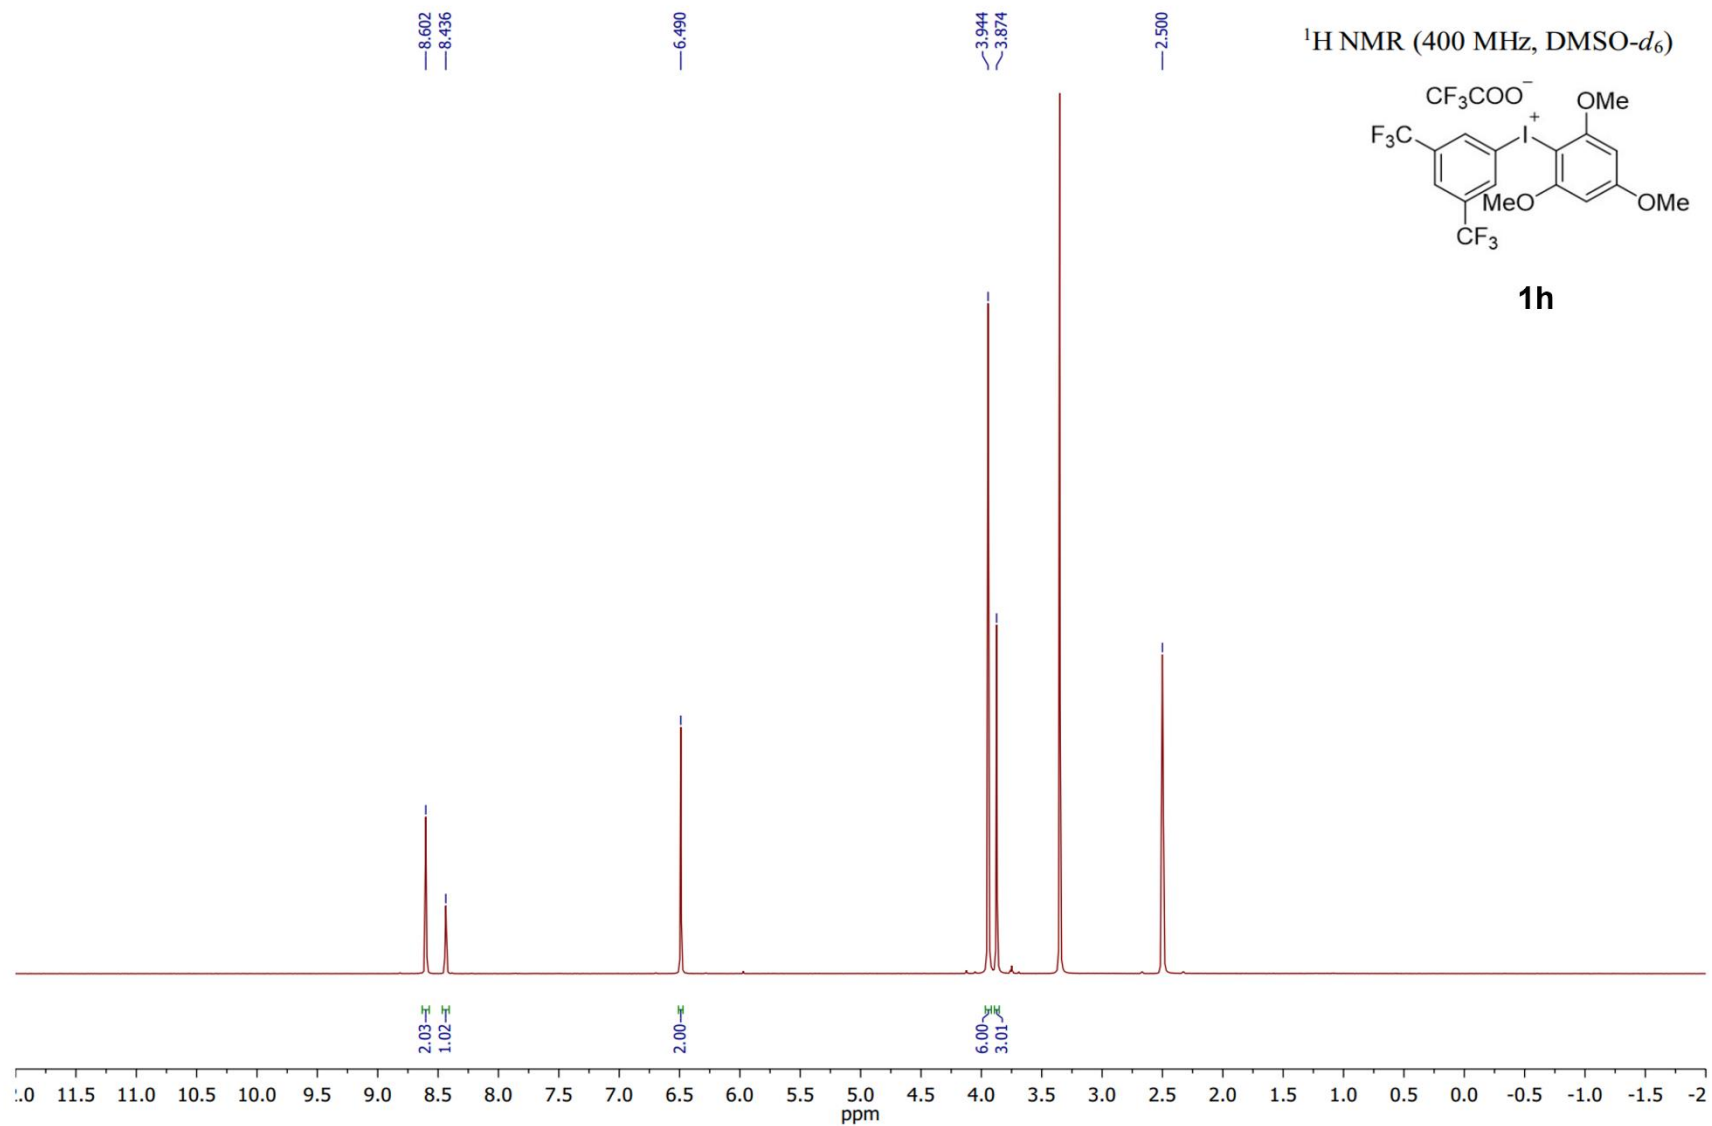

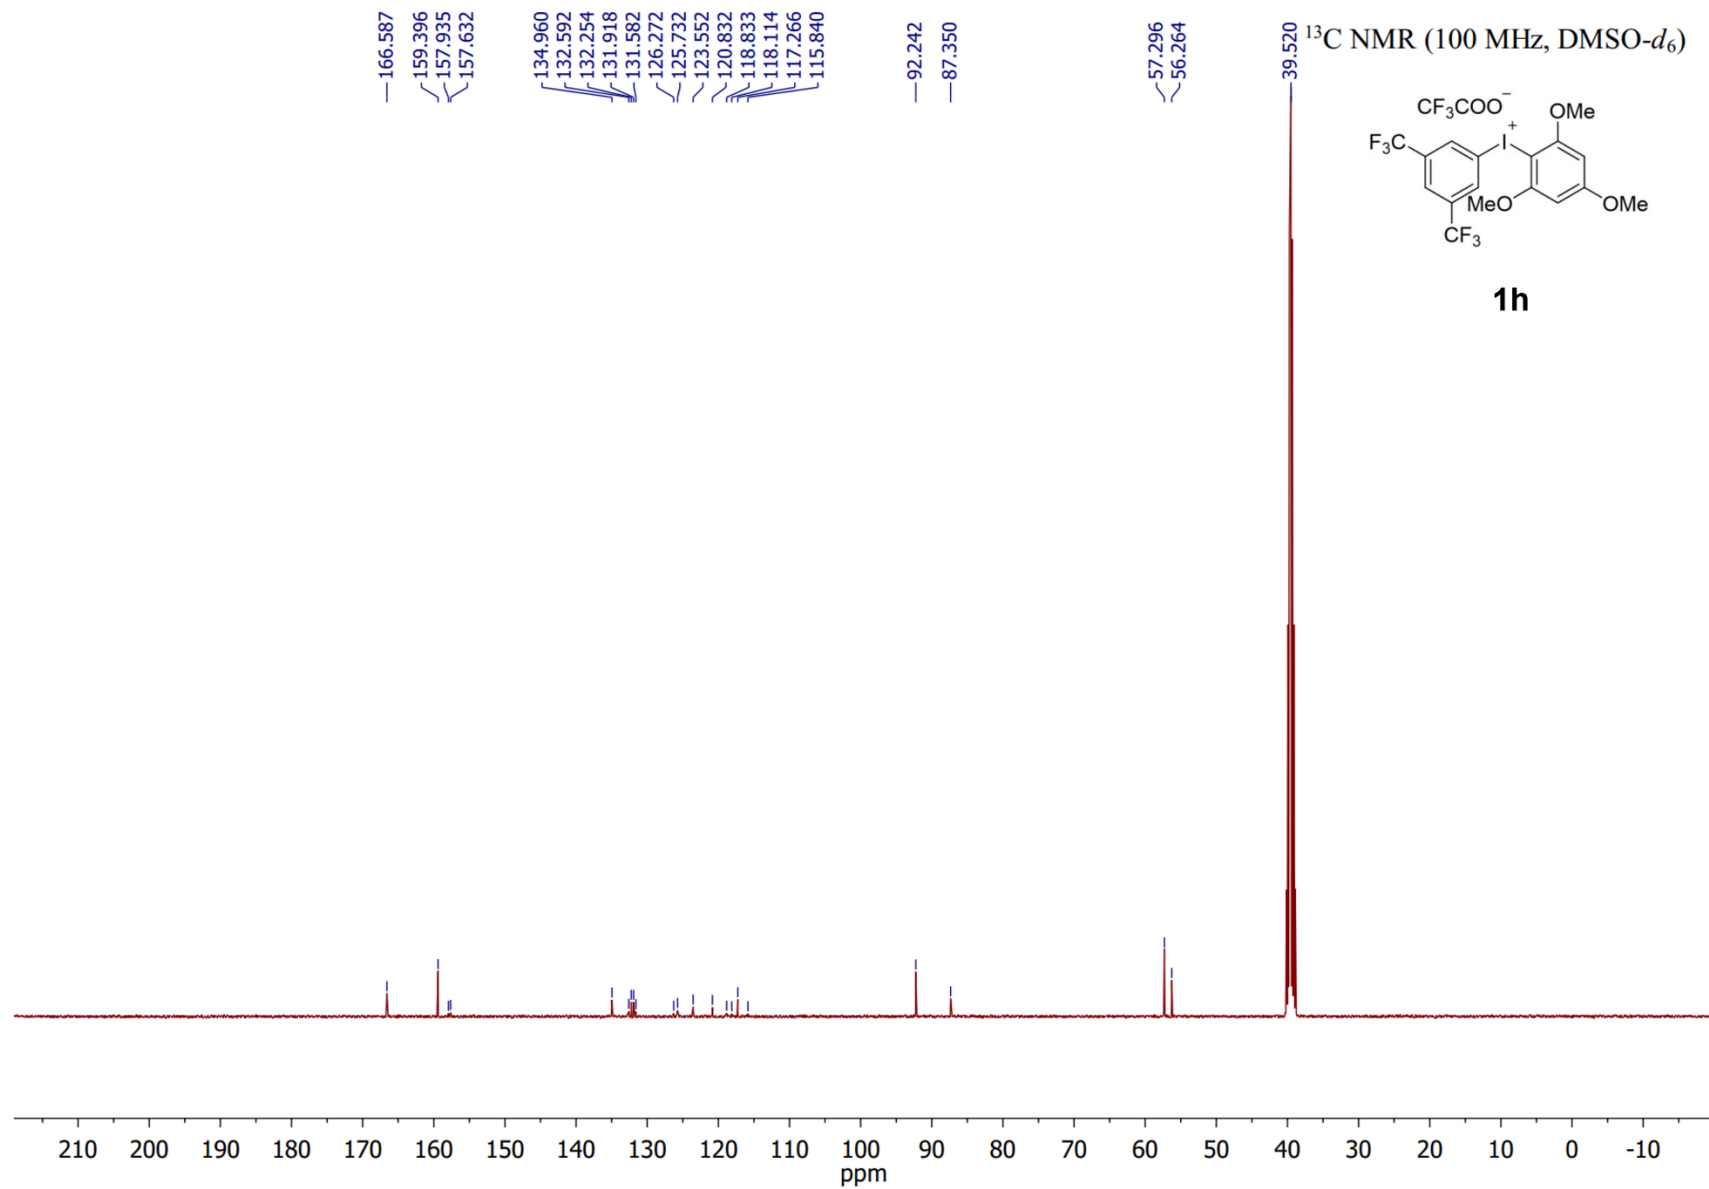

$^{19}\text{F}$  NMR (376 MHz,  $\text{DMSO-}d_6$ )

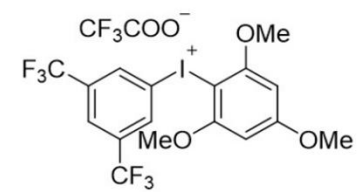

**1h**

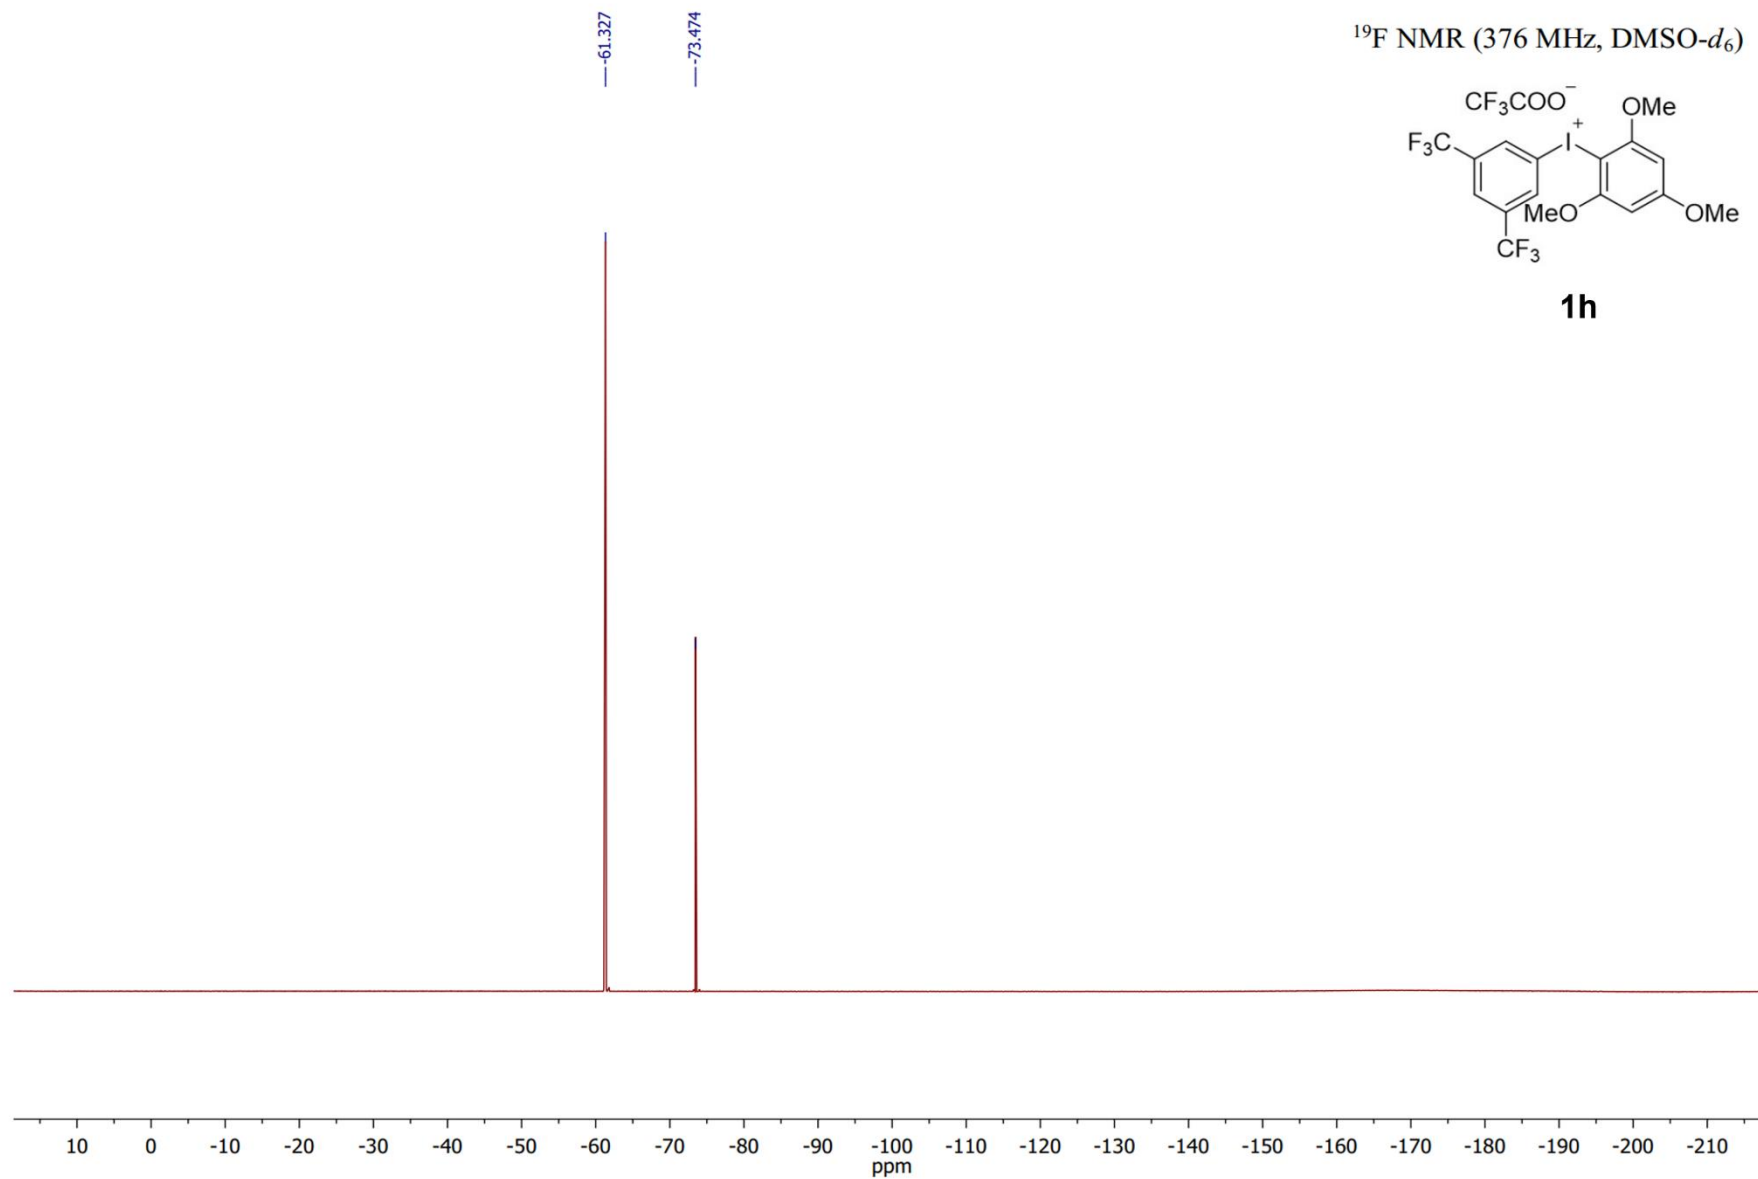

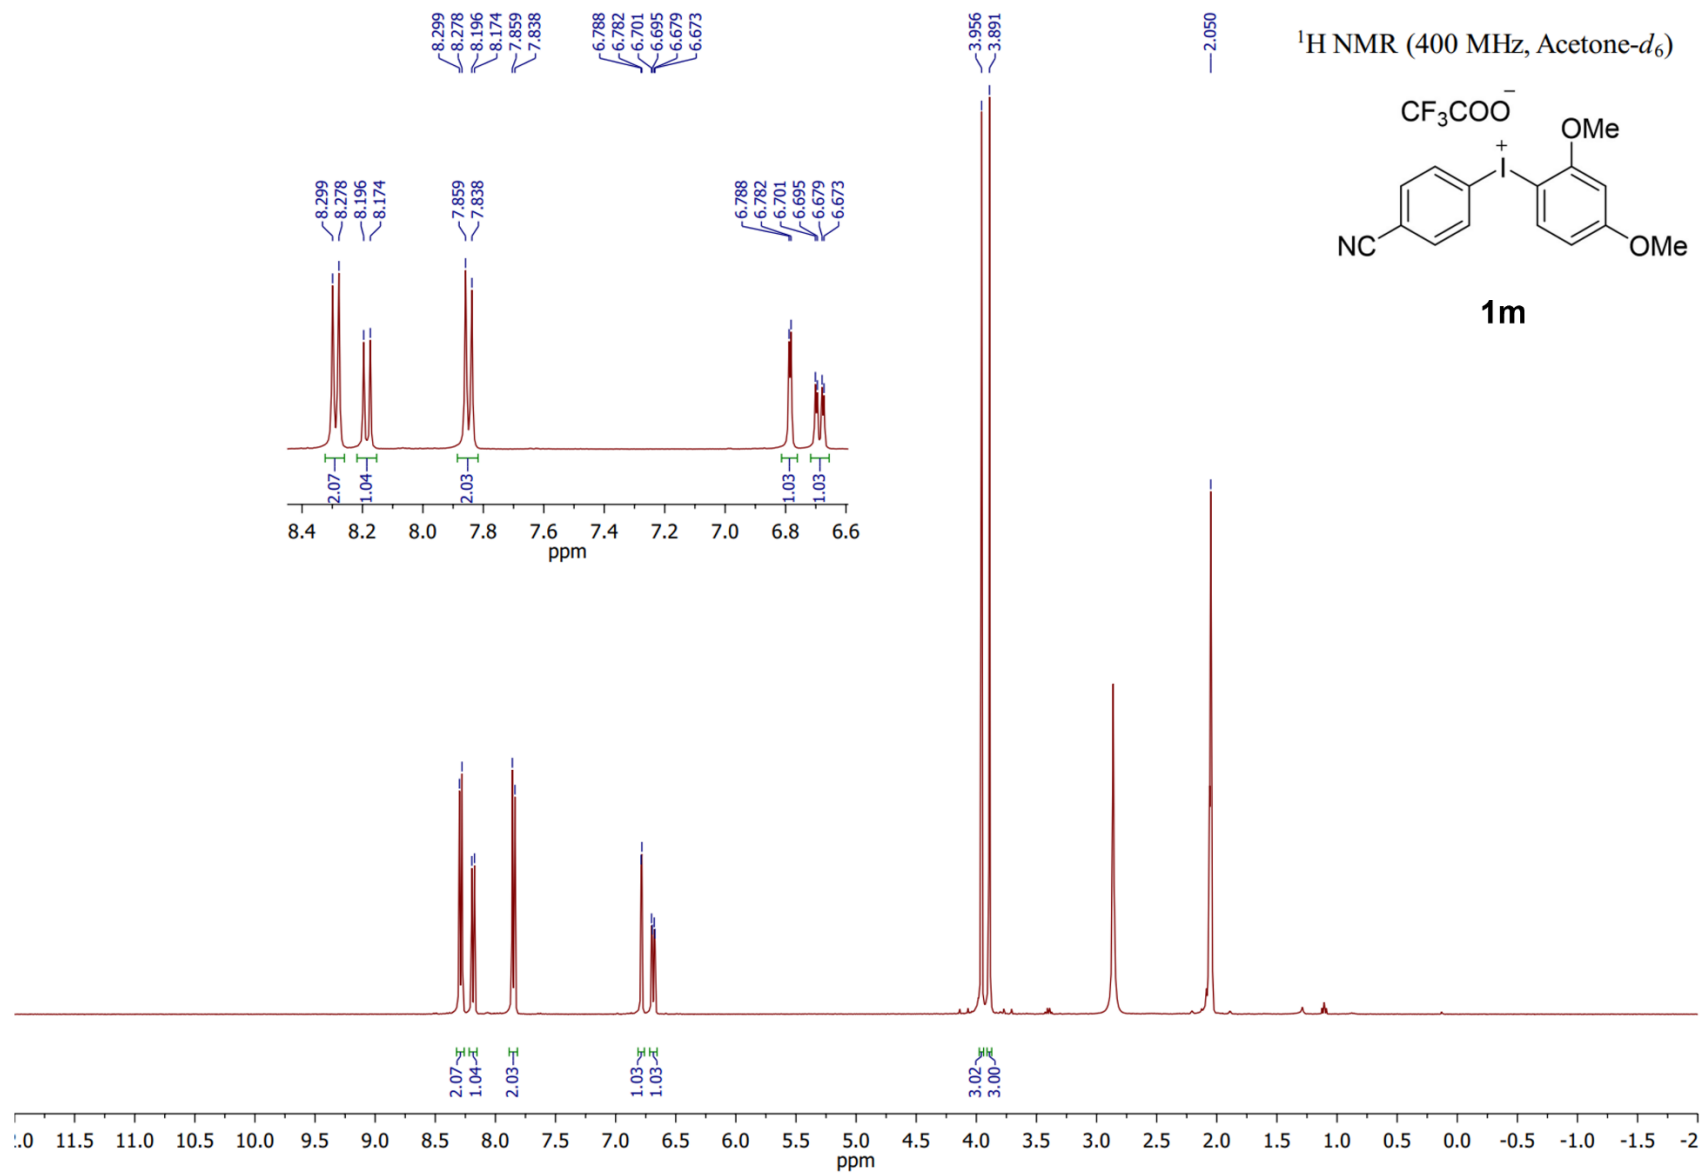

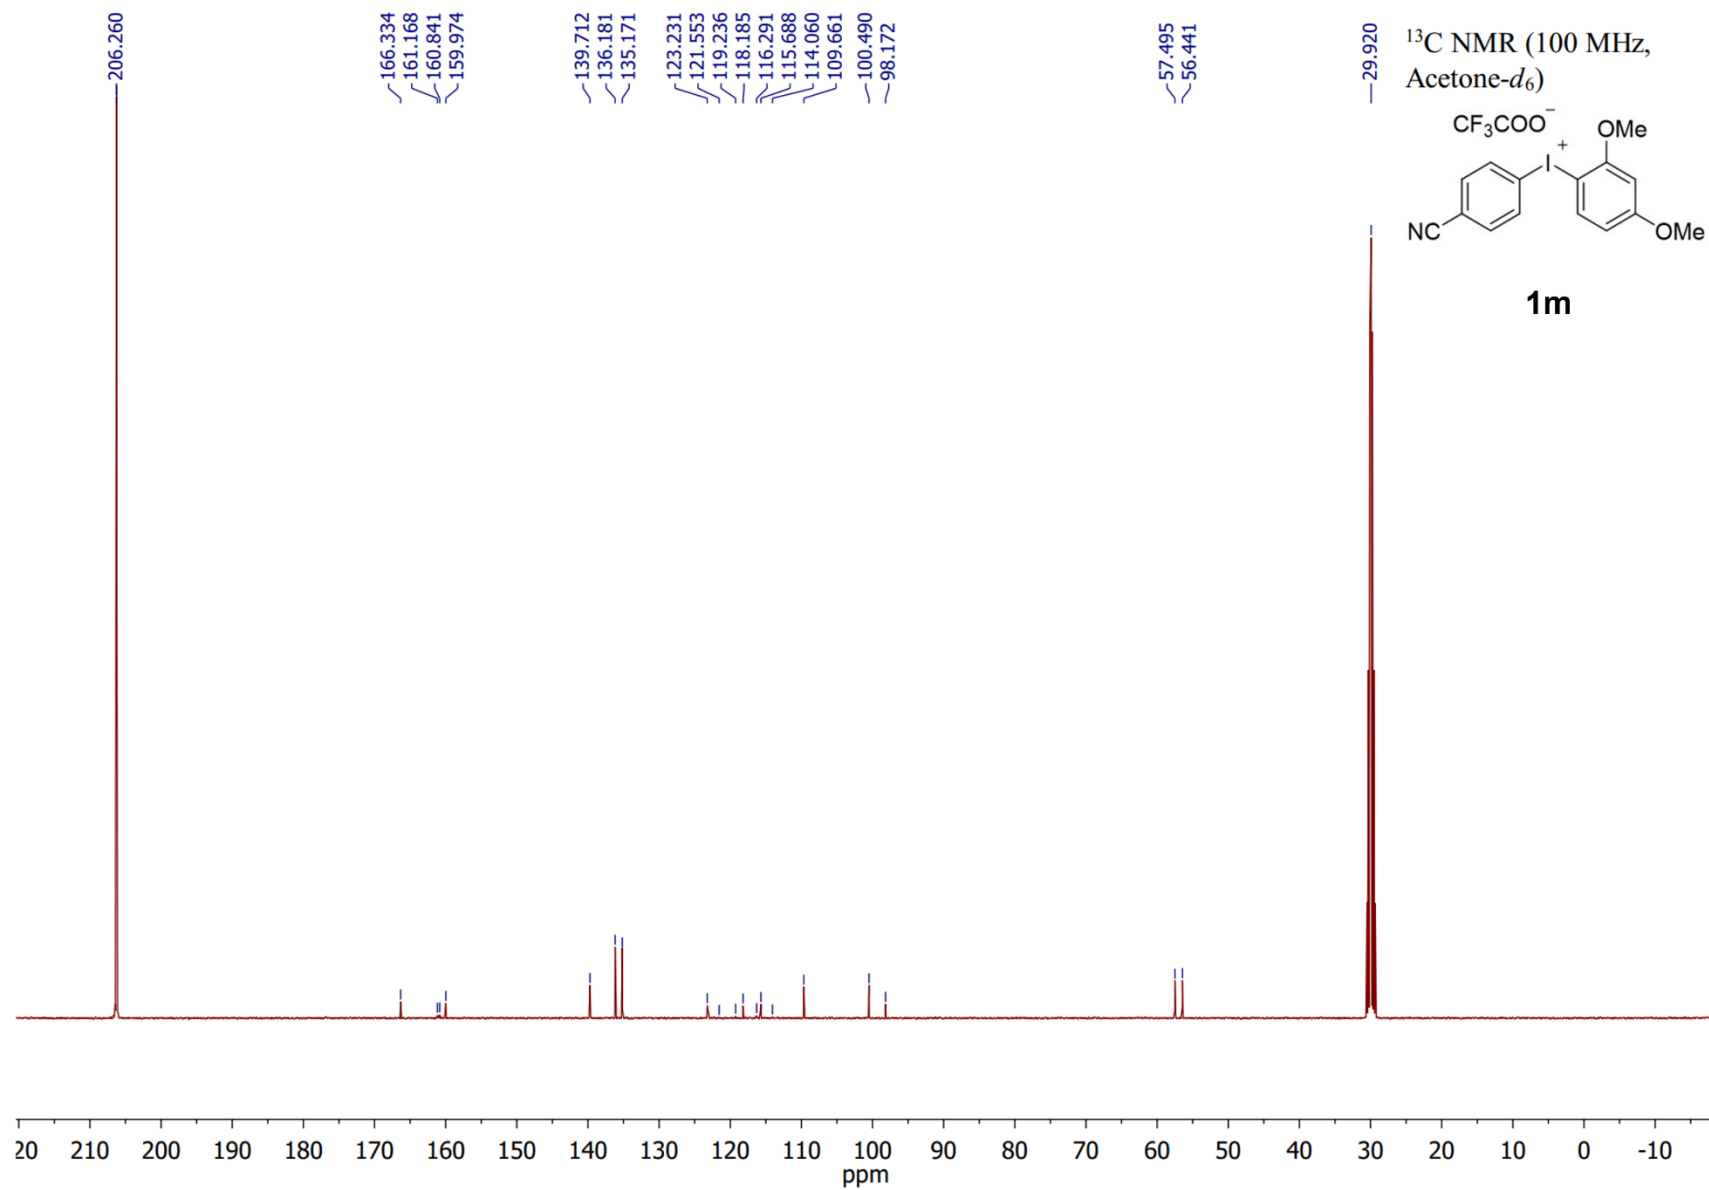

$^{19}\text{F}$  NMR (376 MHz, Acetone- $d_6$ )

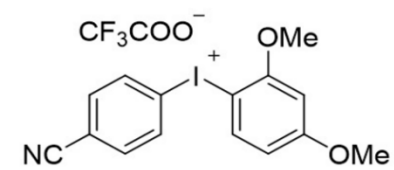

**1m**

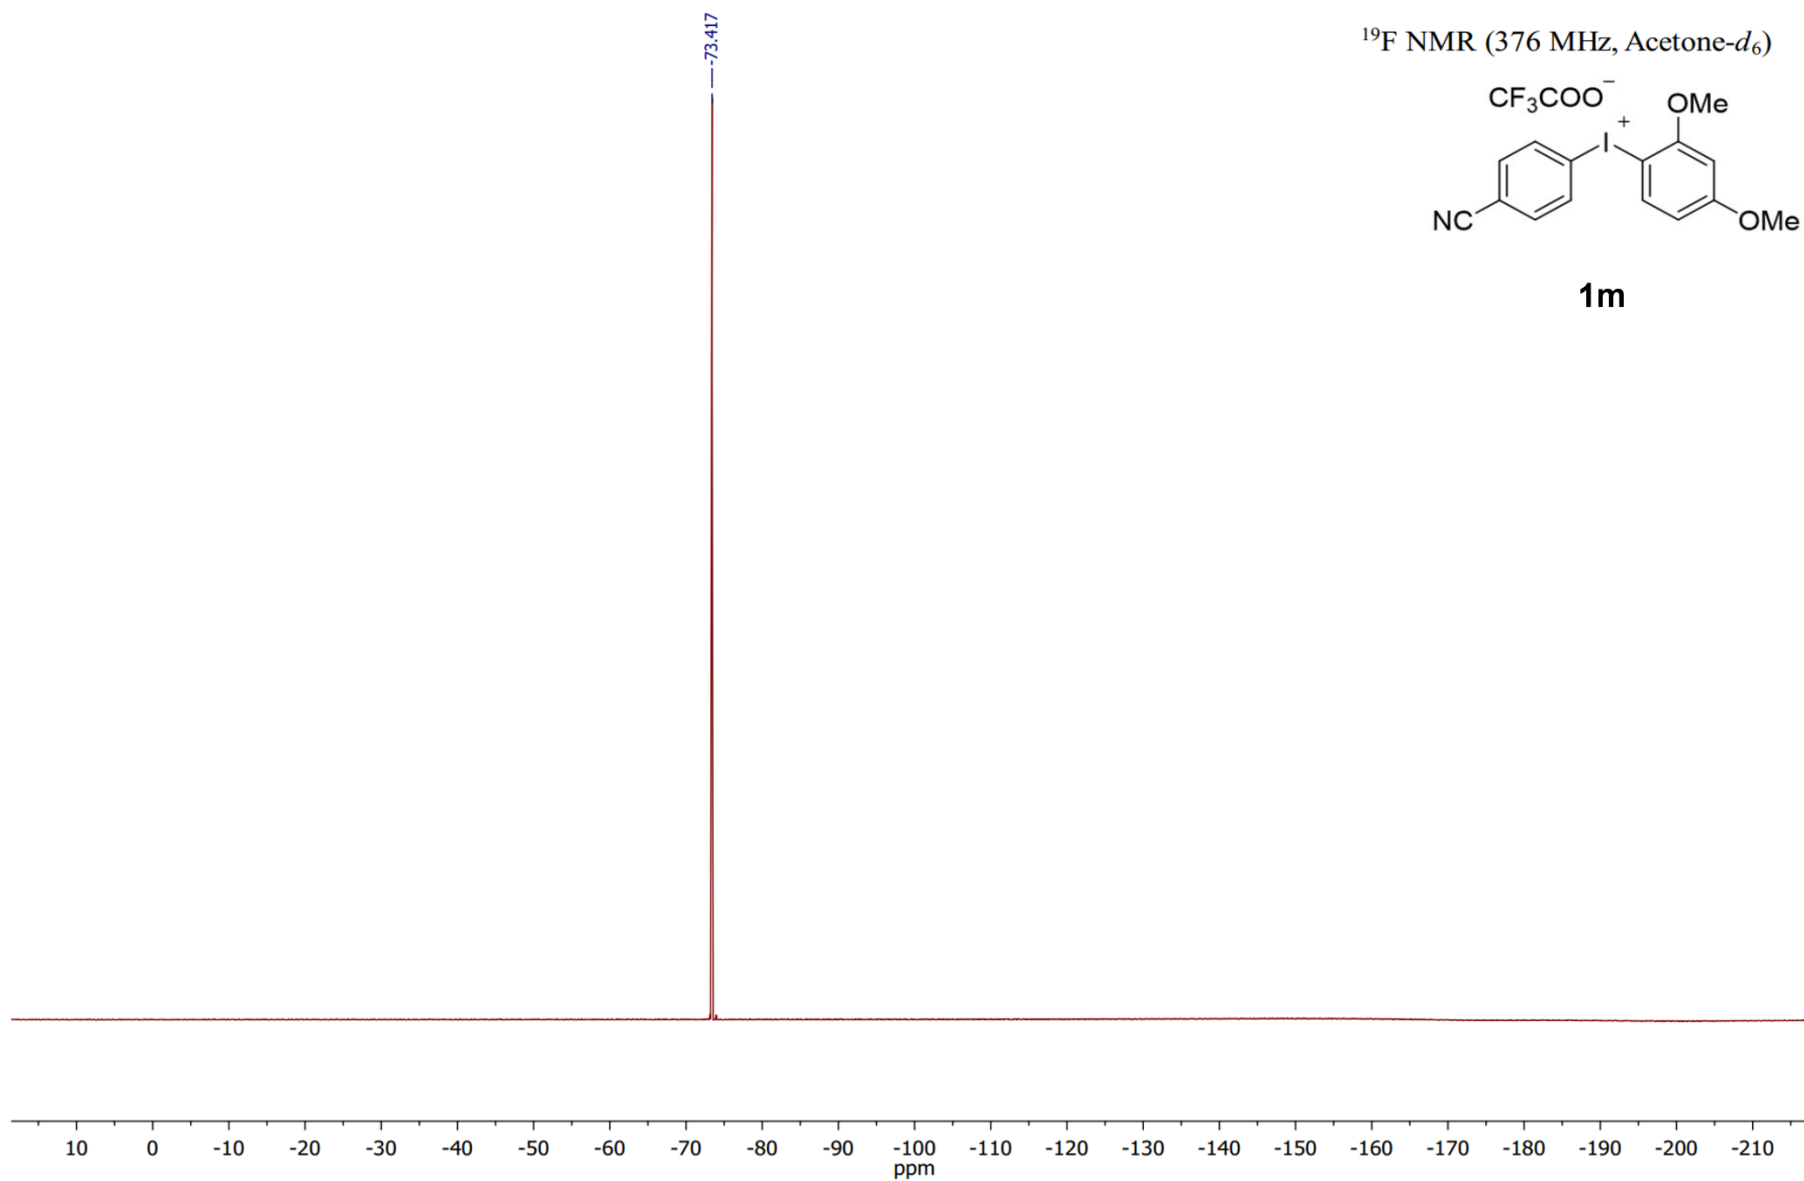

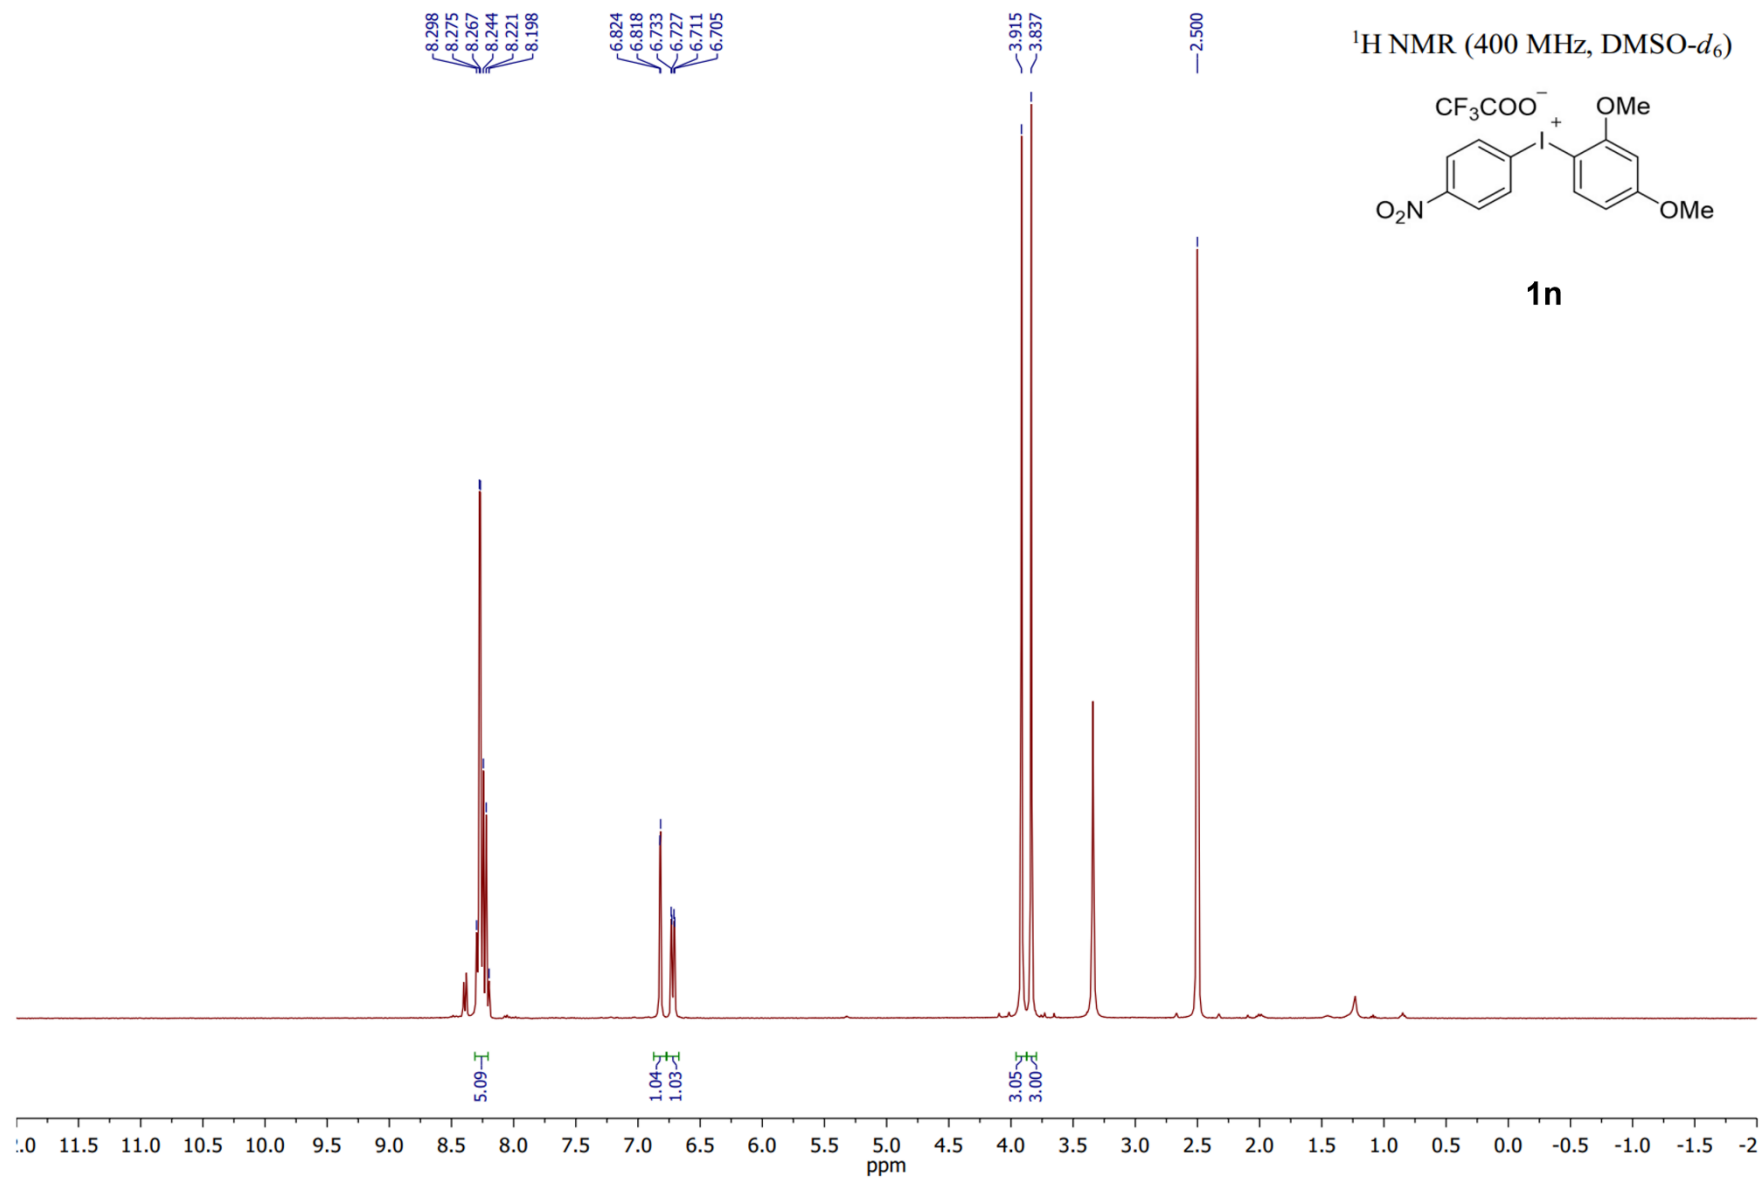

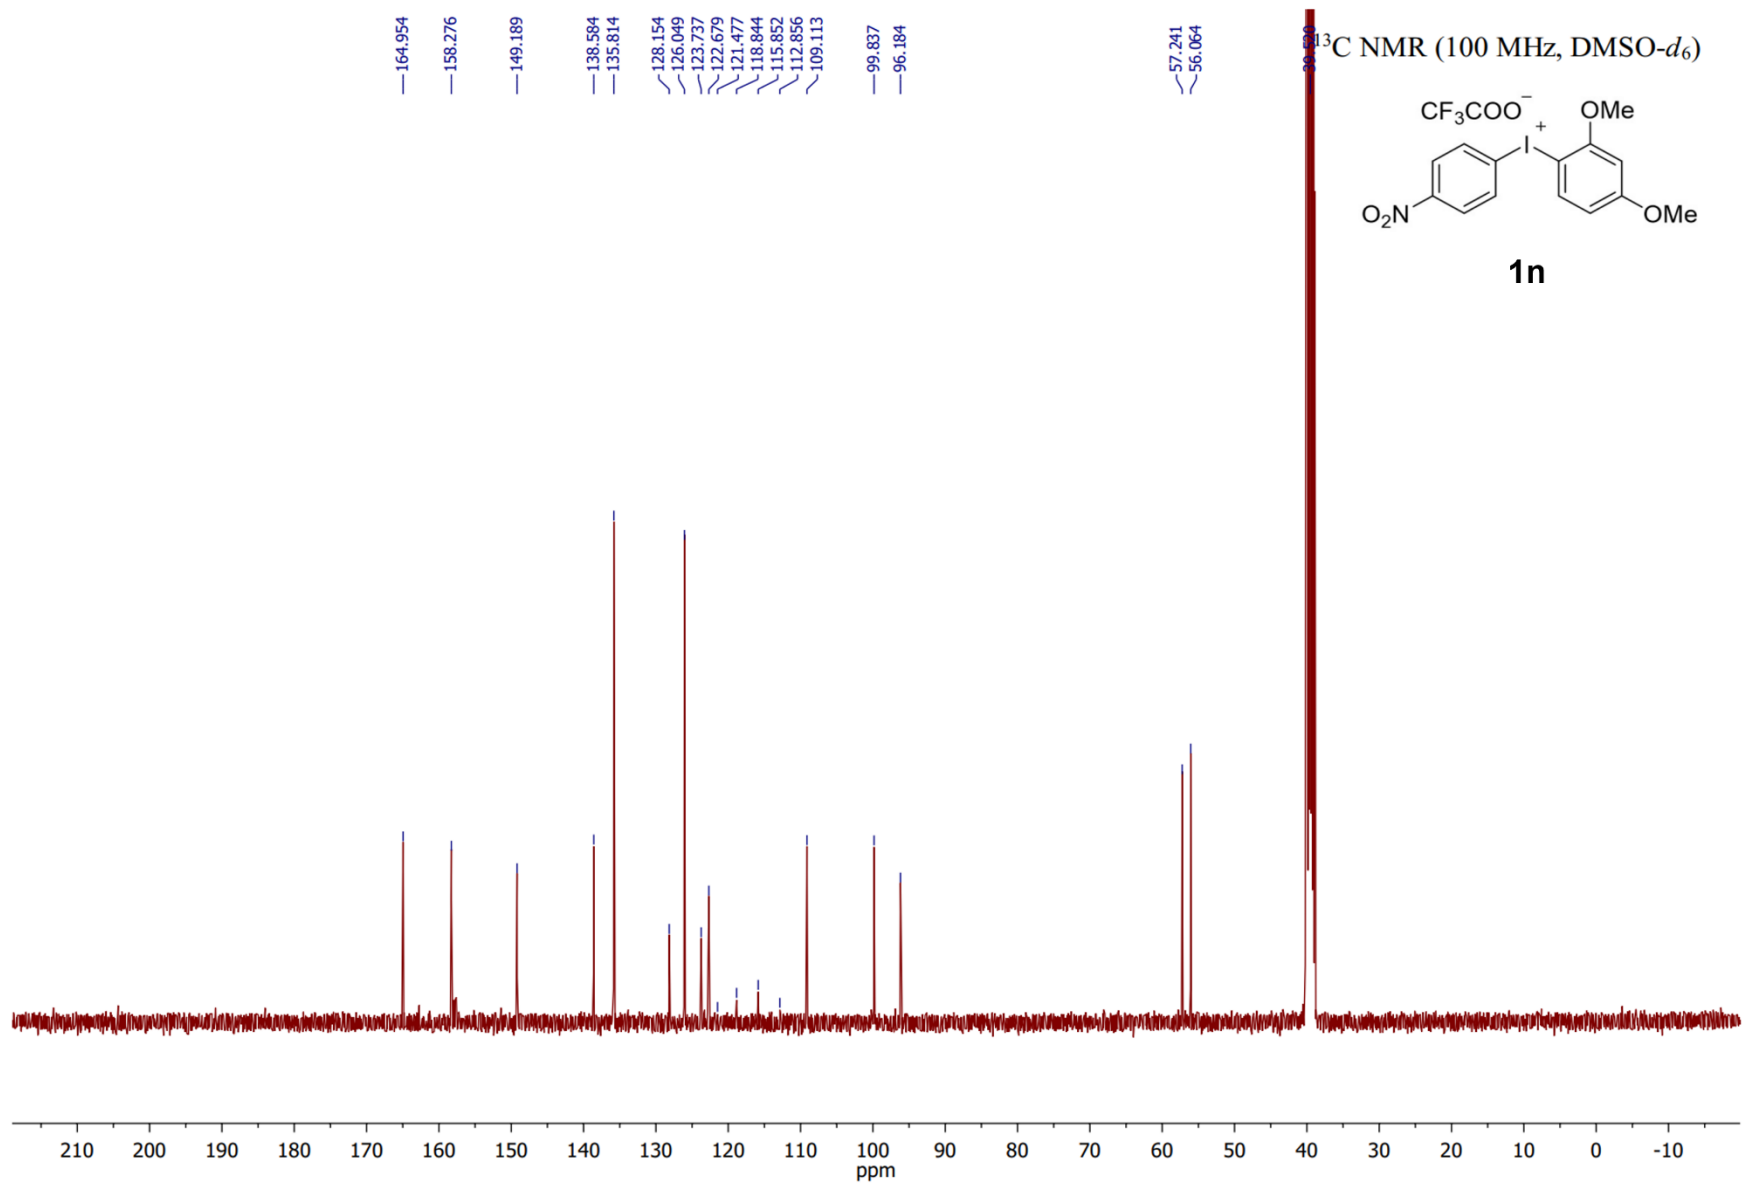



$^{19}\text{F}$  NMR (376 MHz,  $\text{DMSO-}d_6$ )

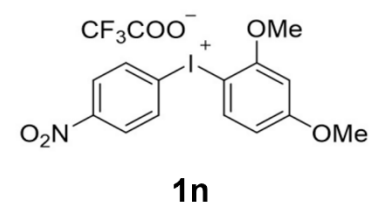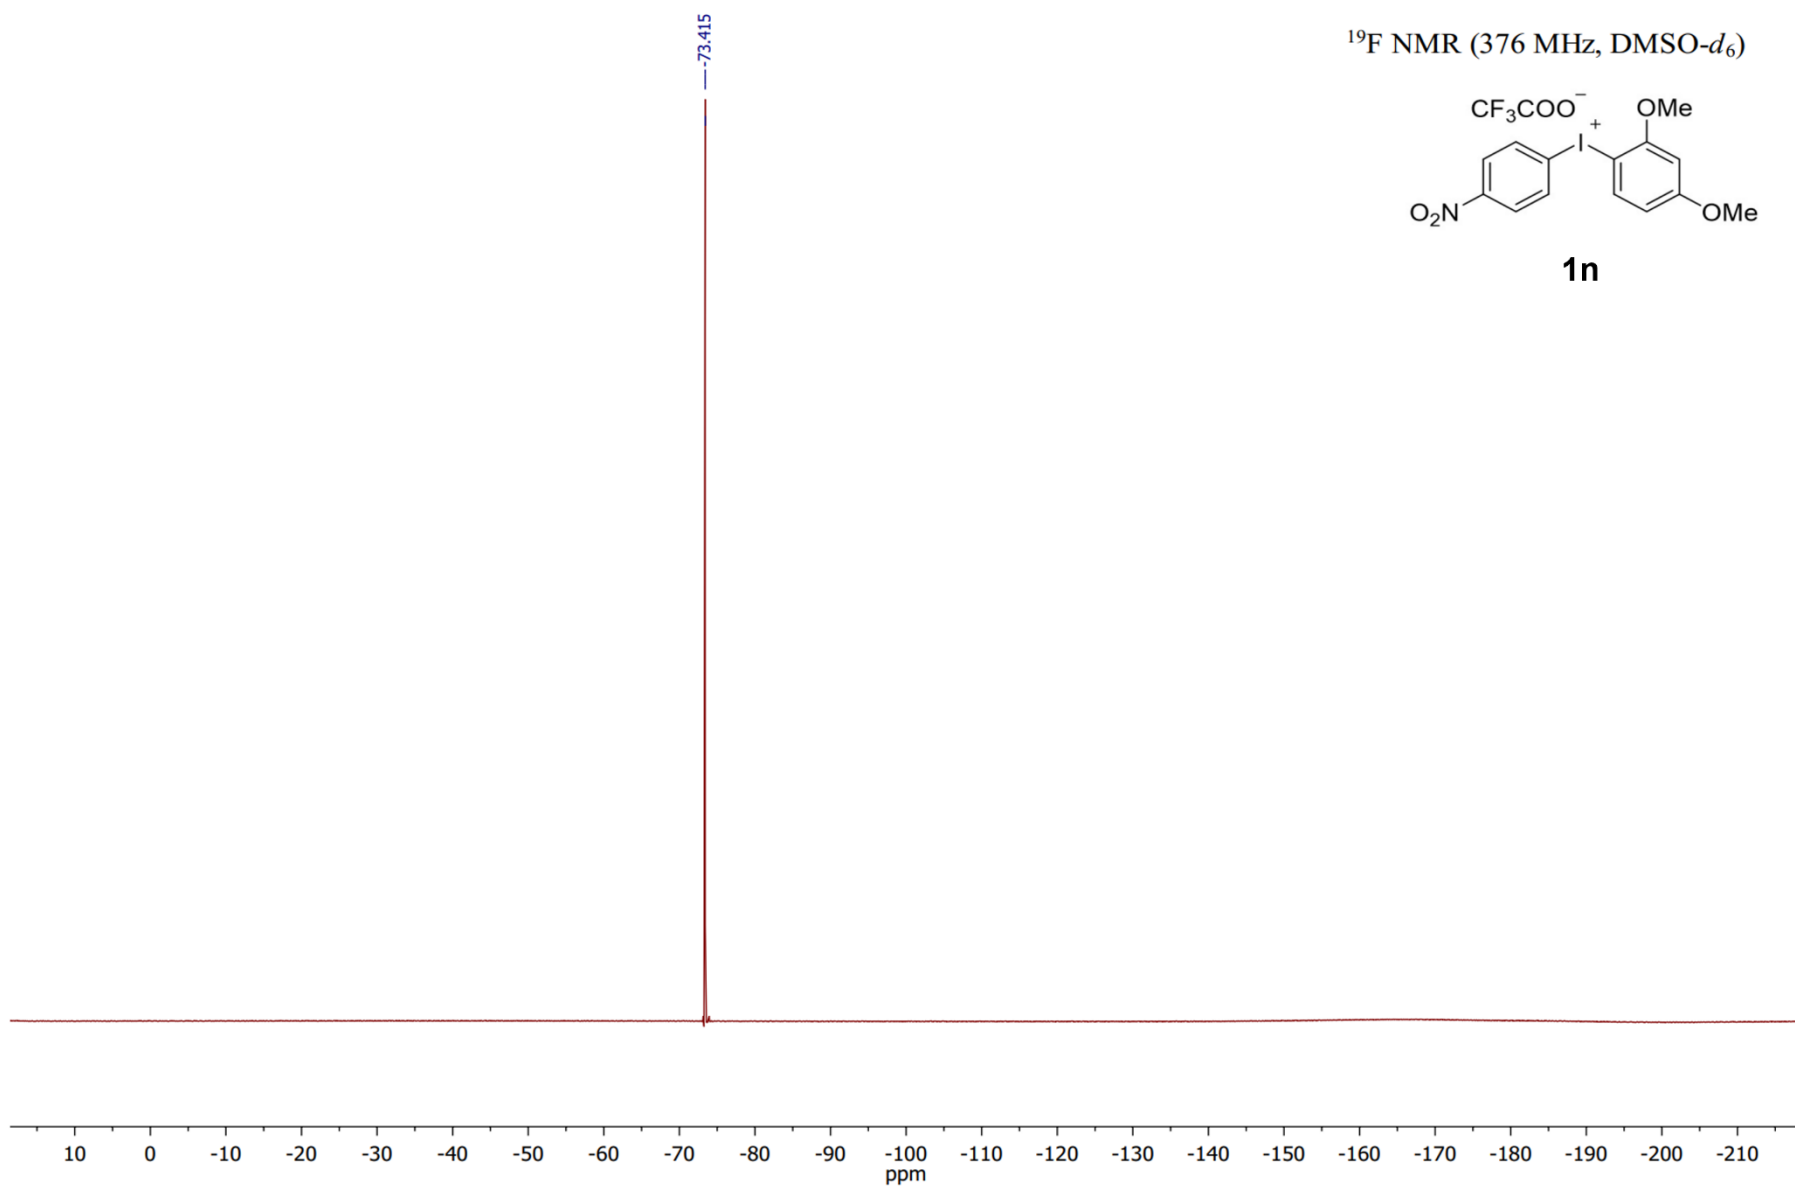

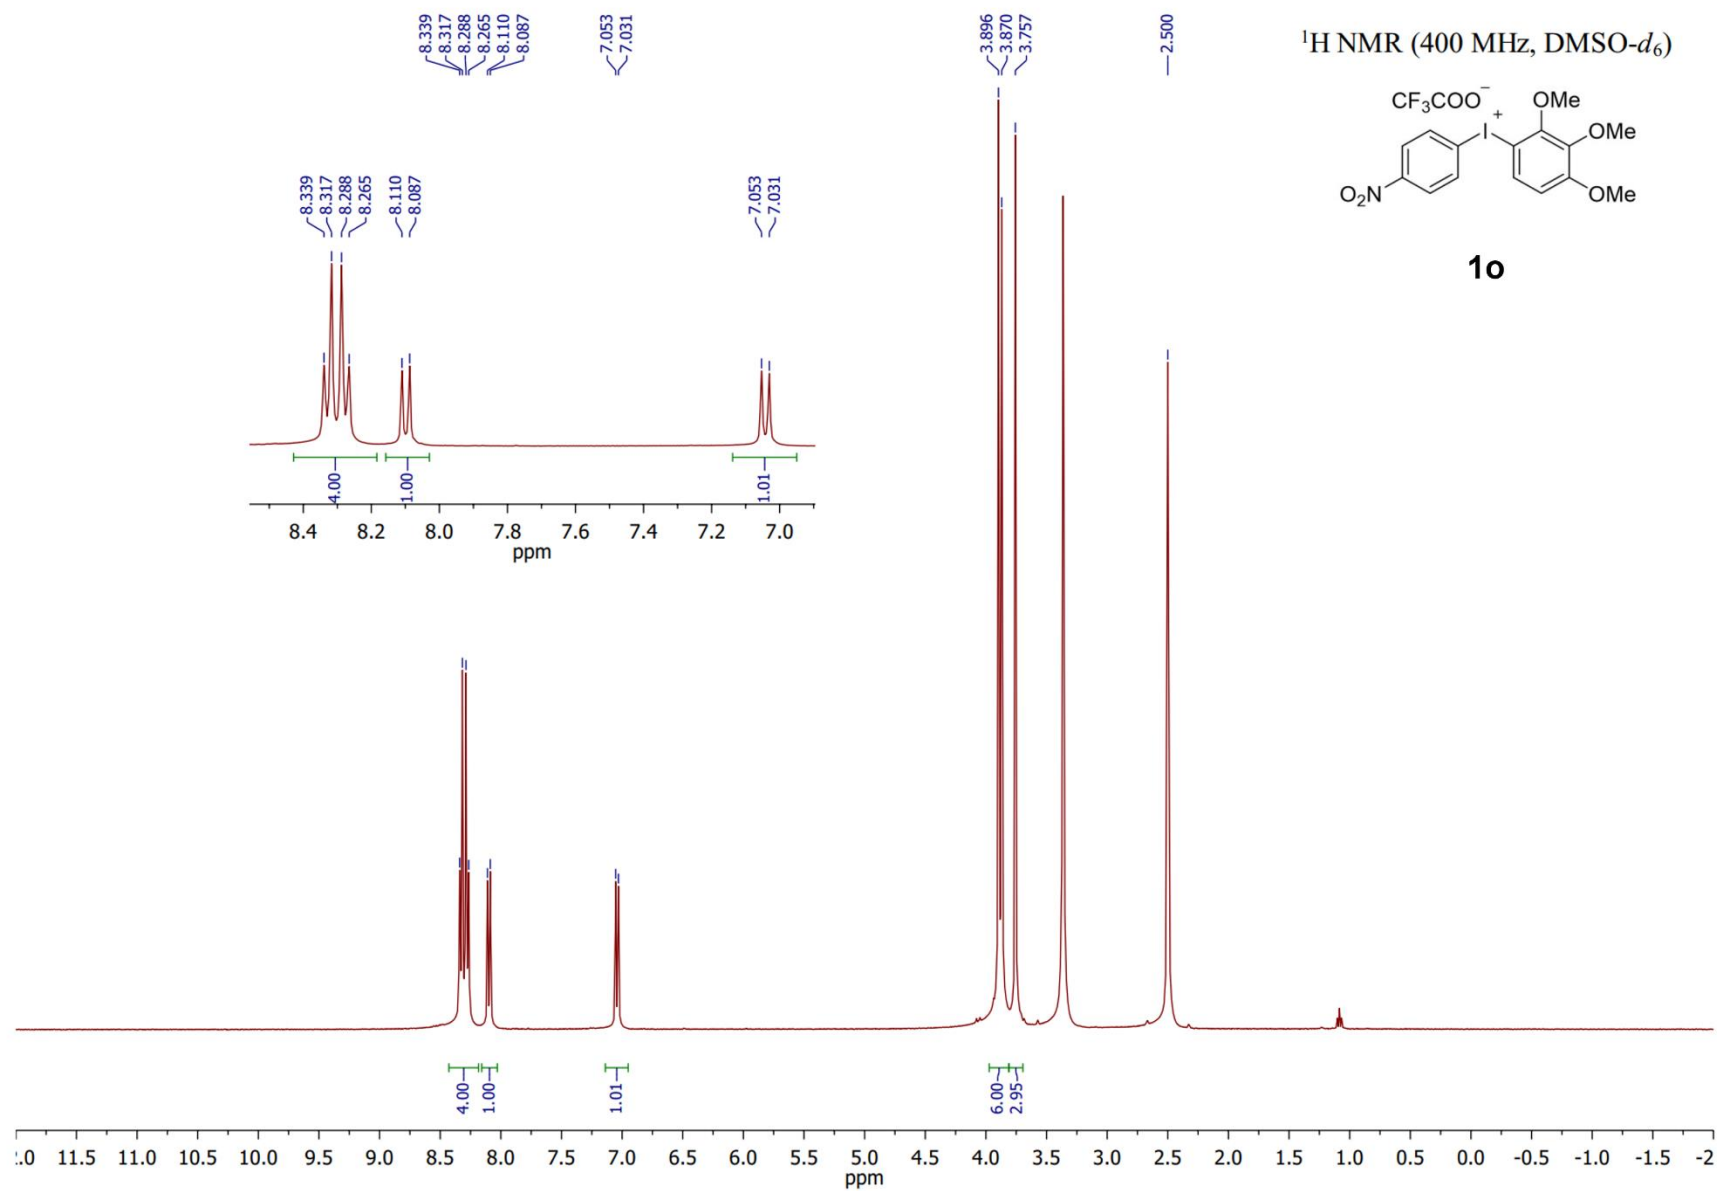

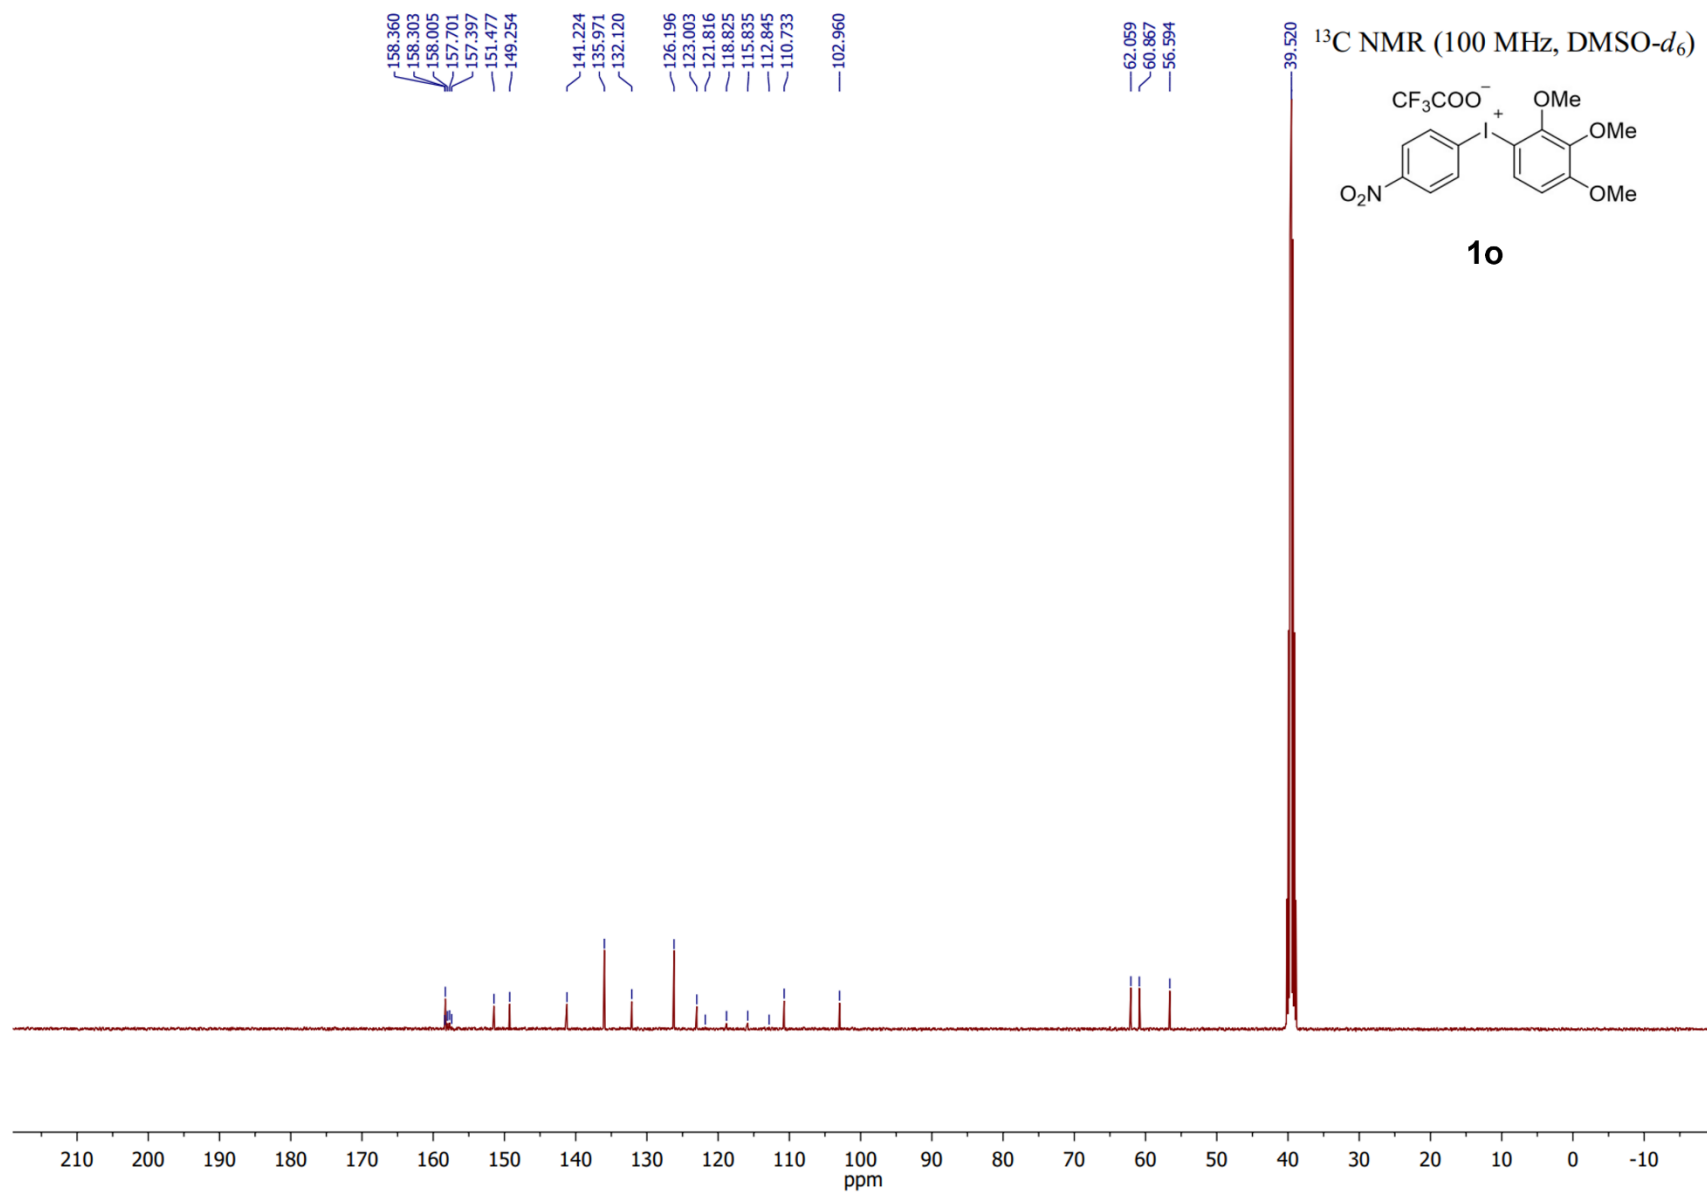

$^{19}\text{F}$  NMR (376 MHz,  $\text{DMSO-}d_6$ )

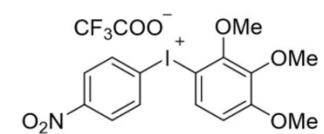

**1o**

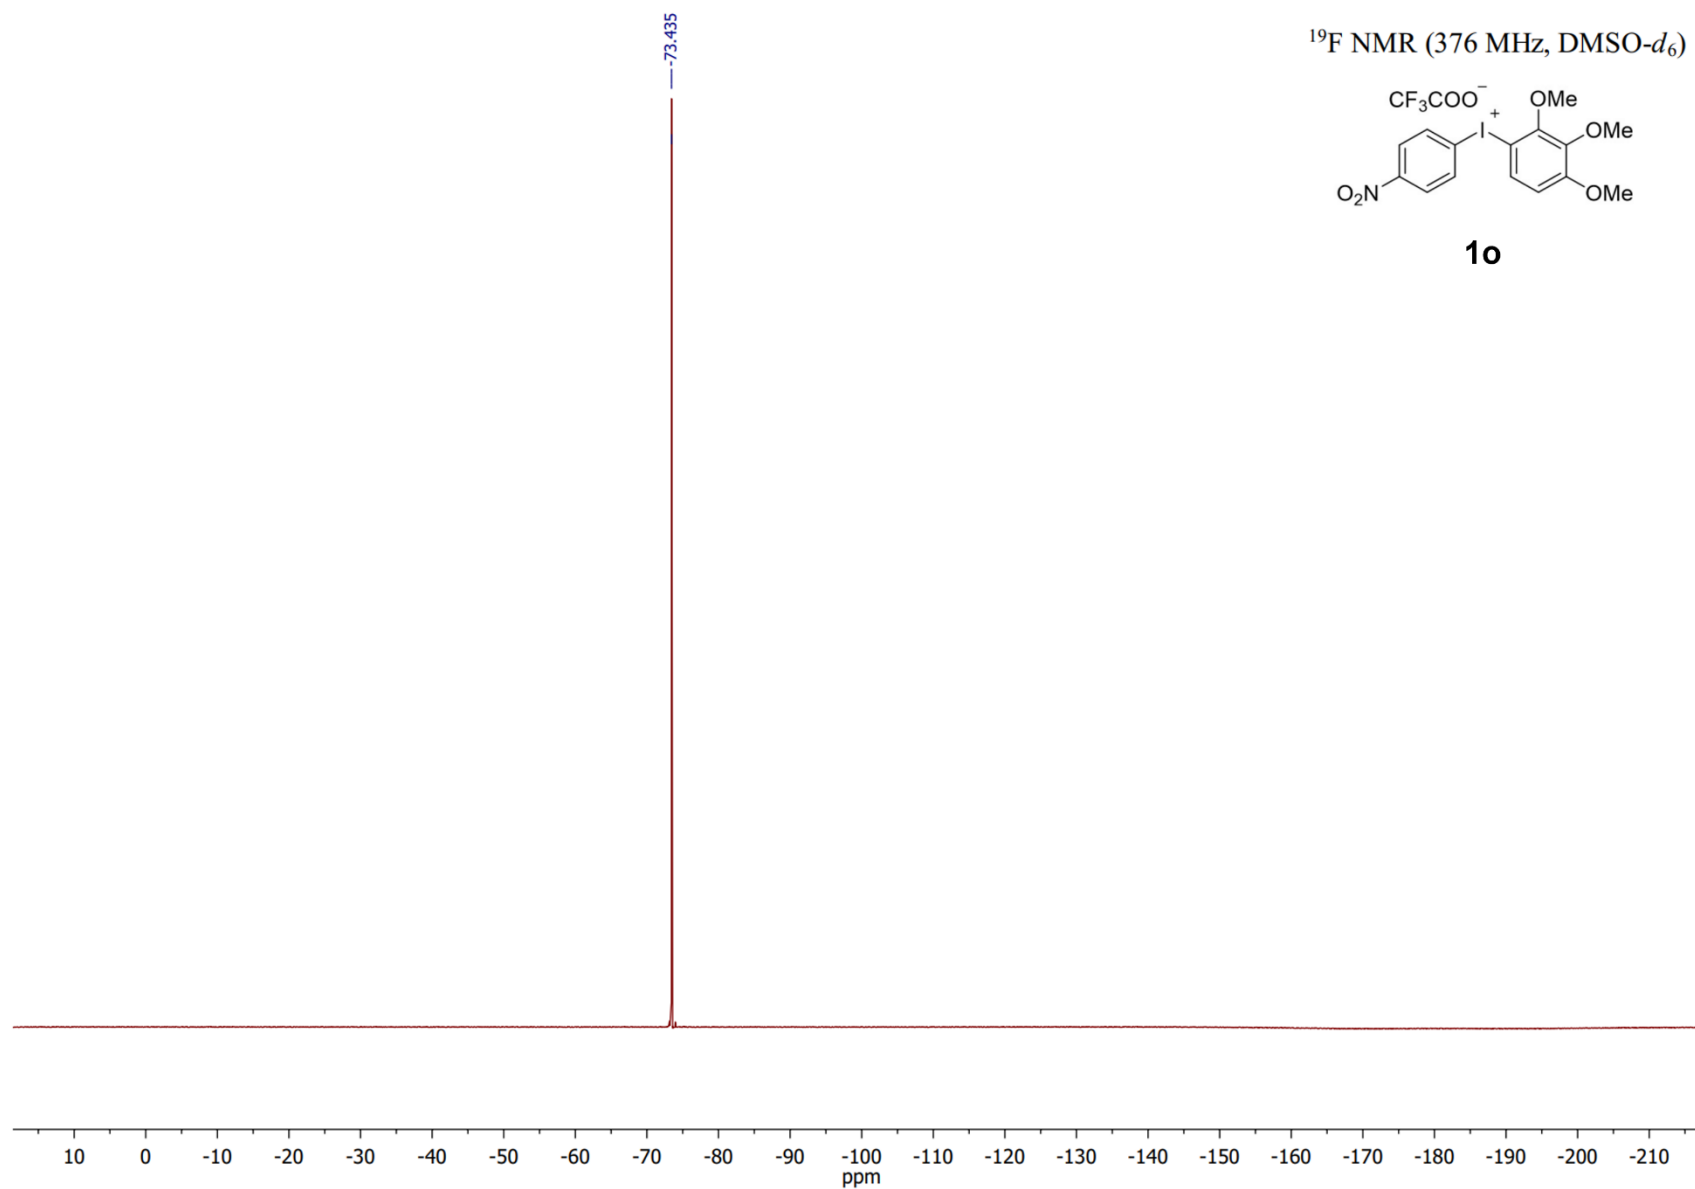

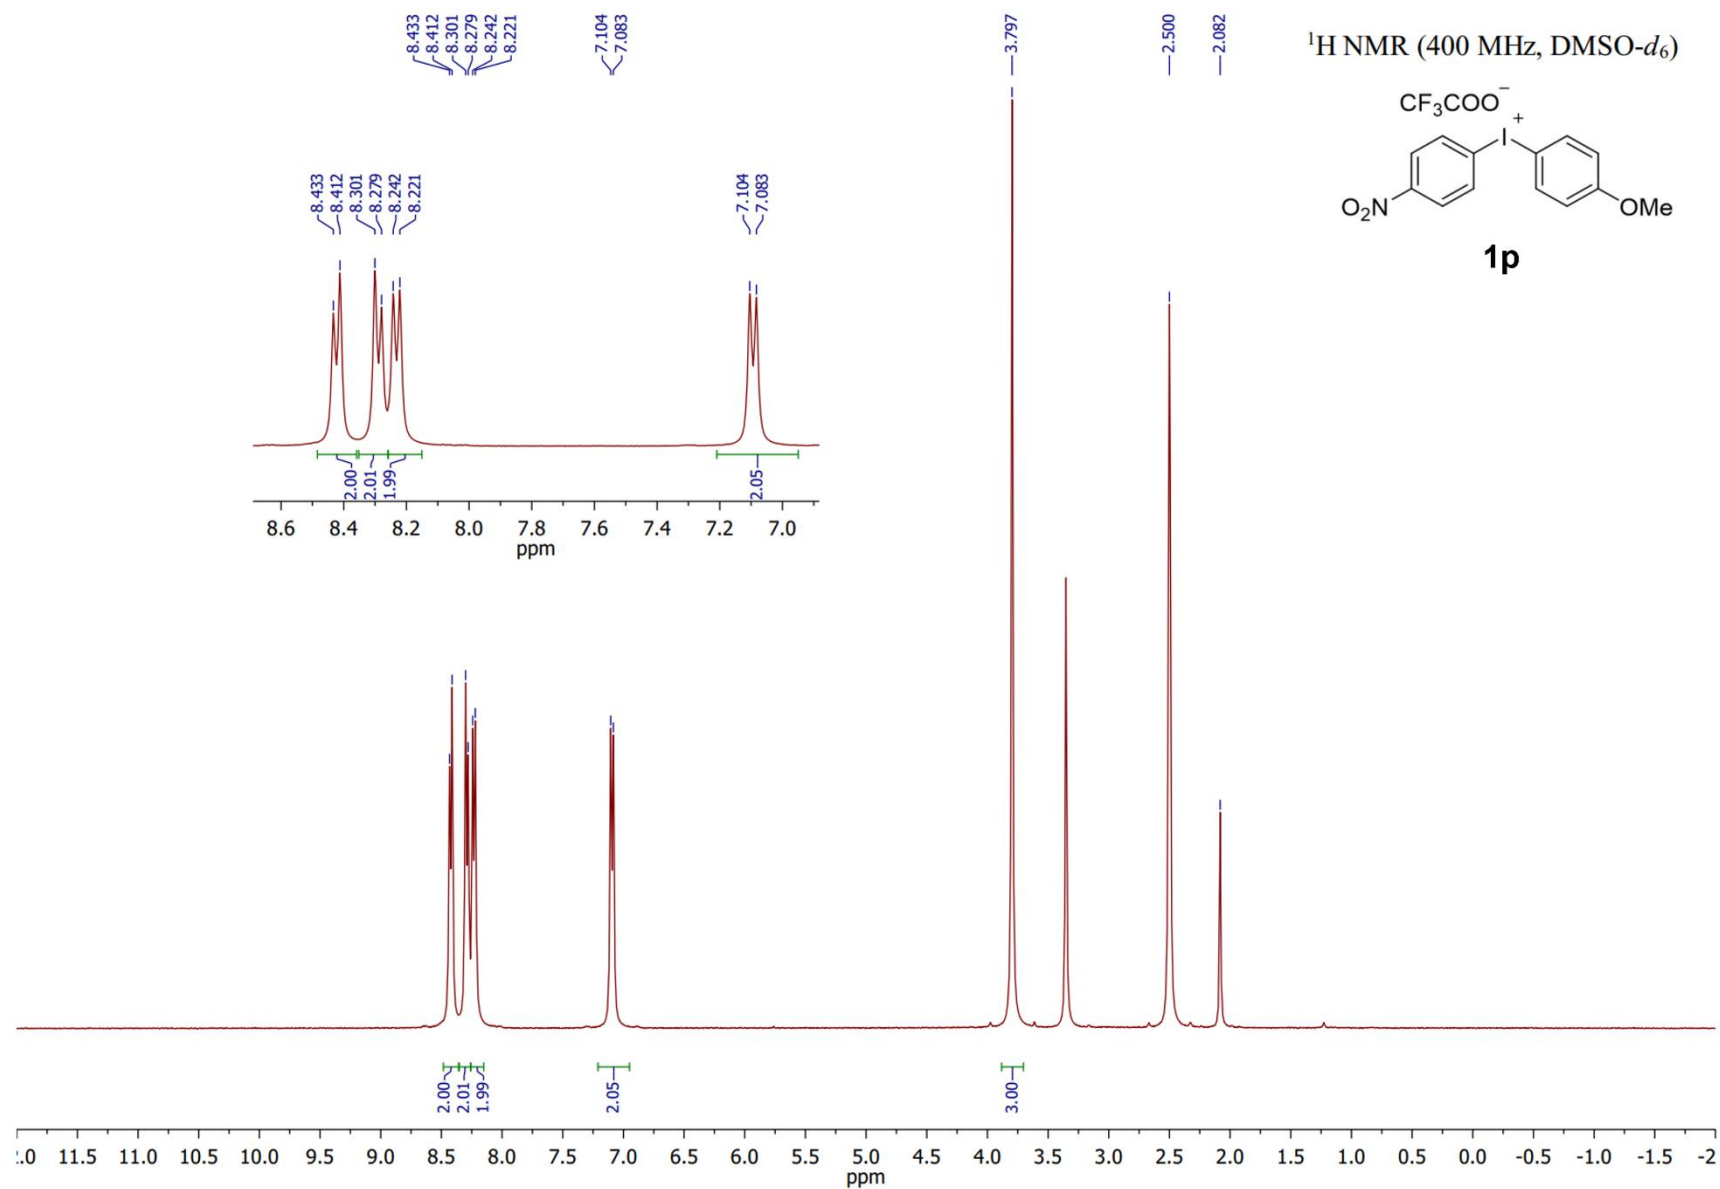

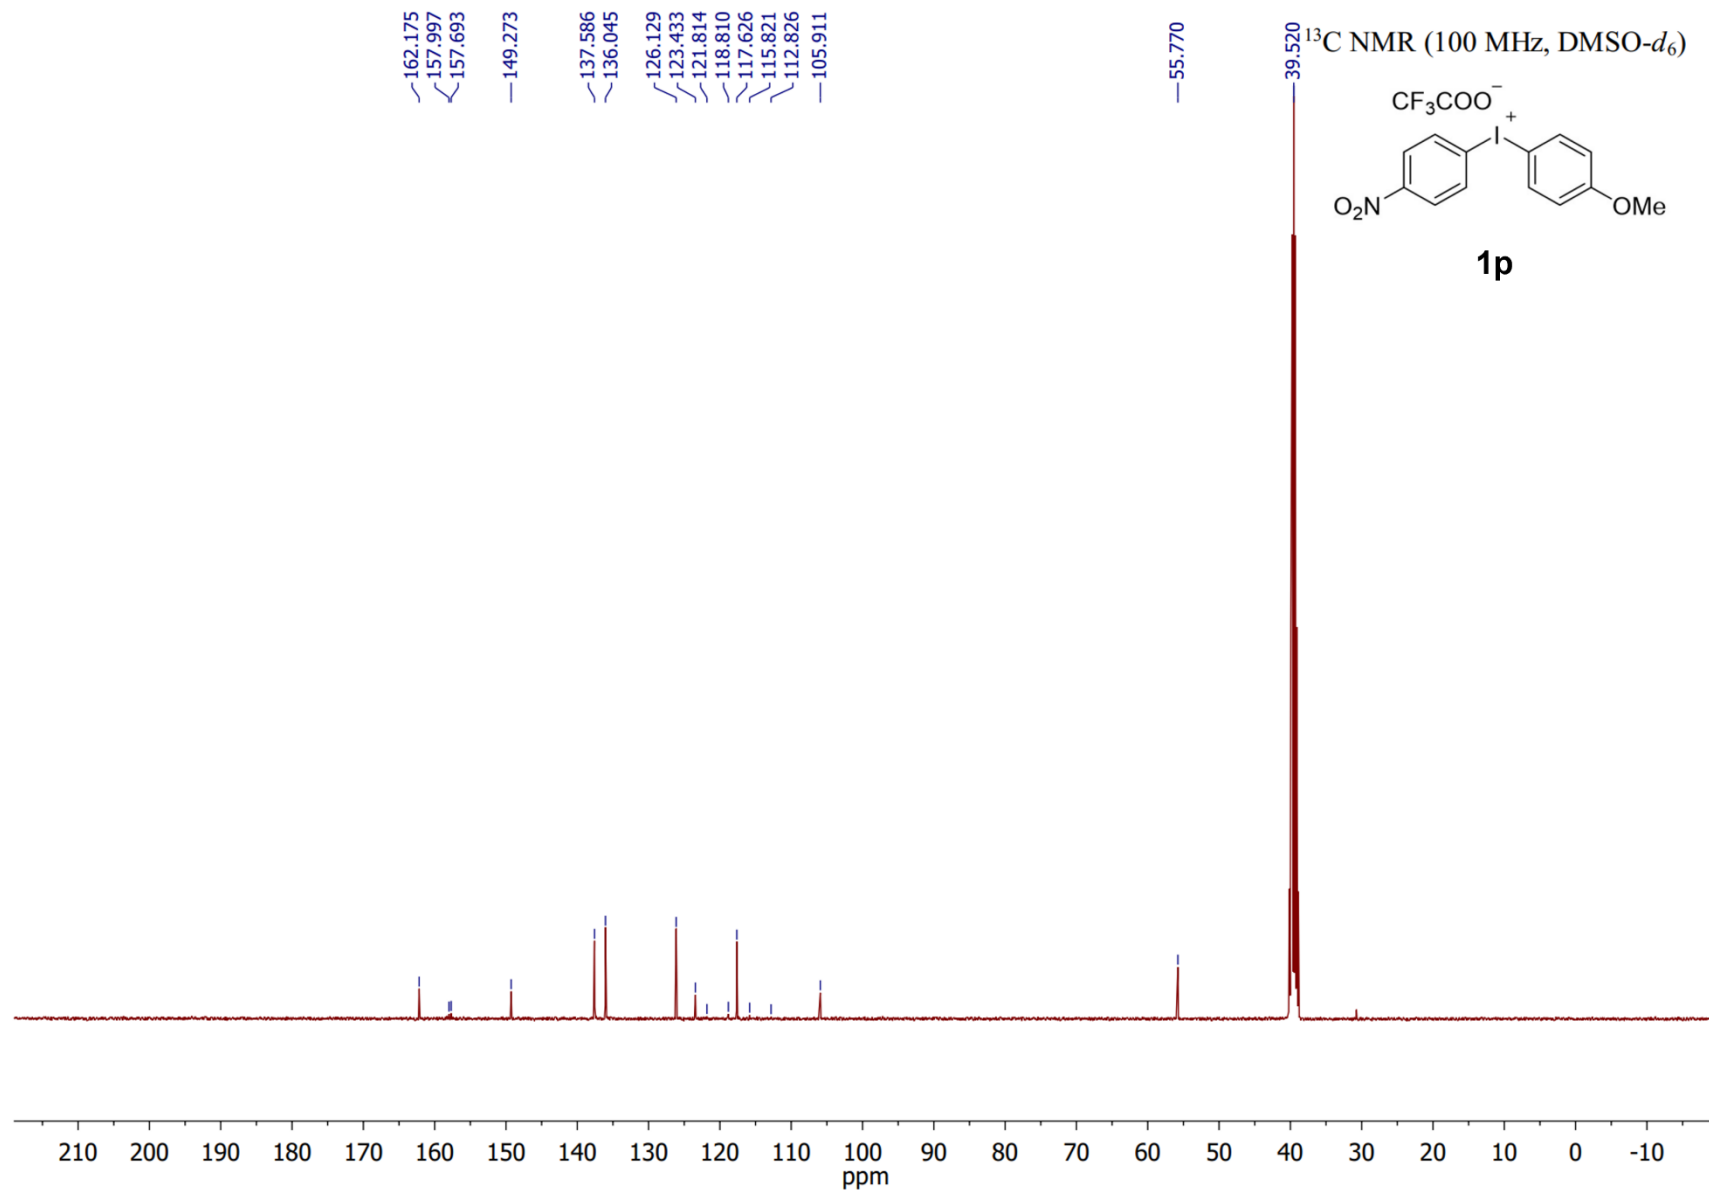

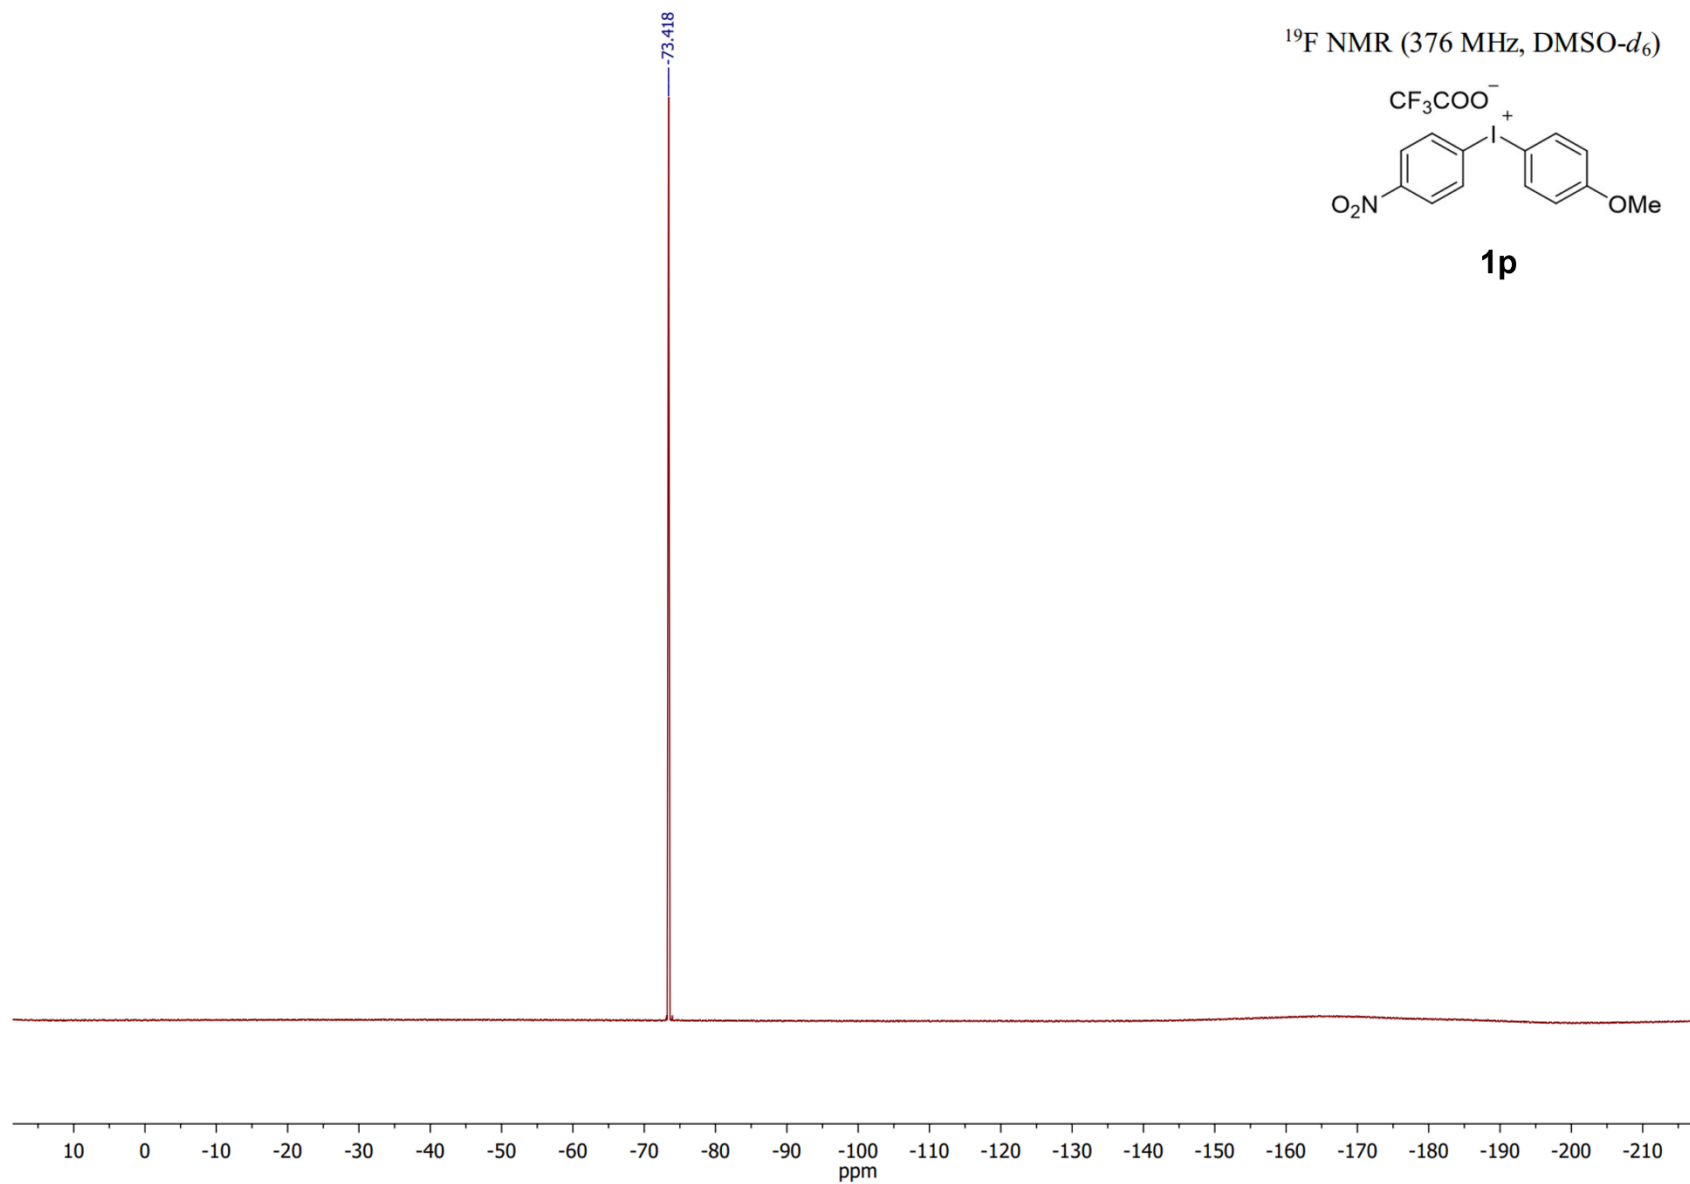

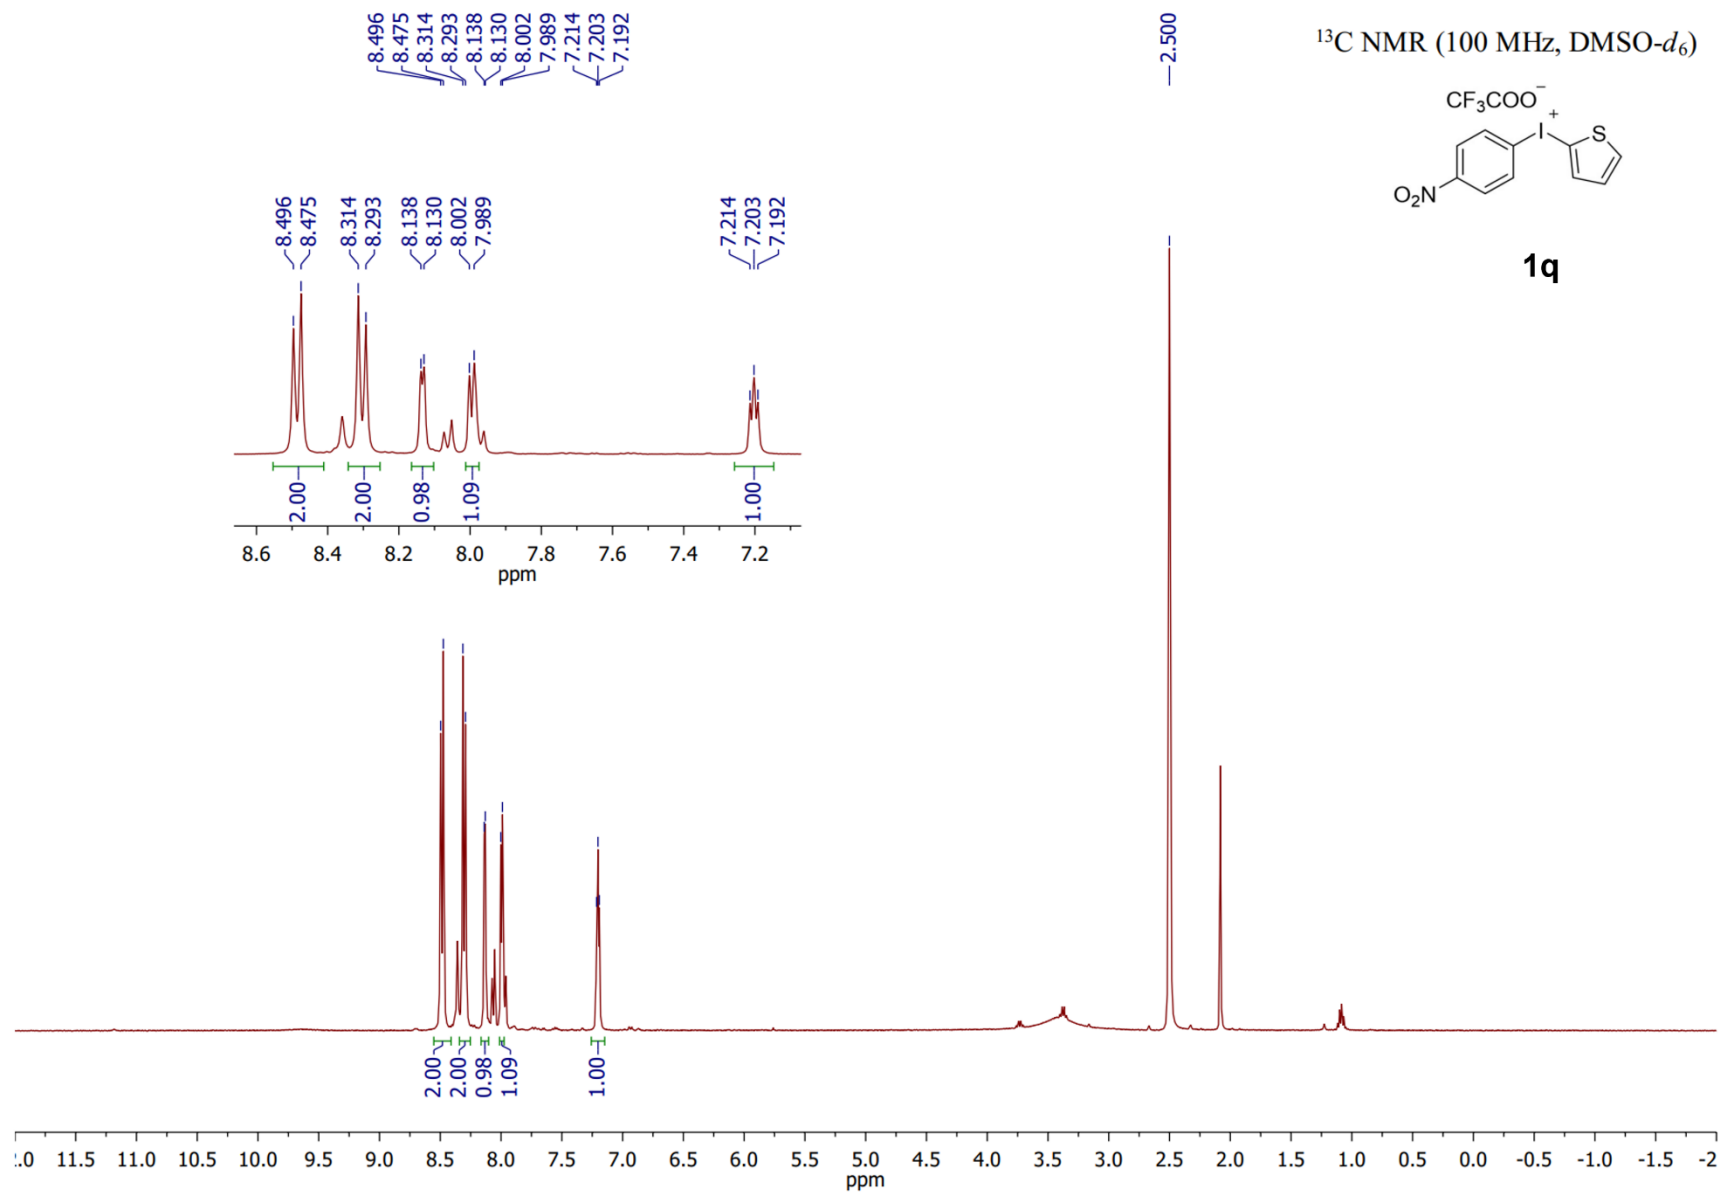



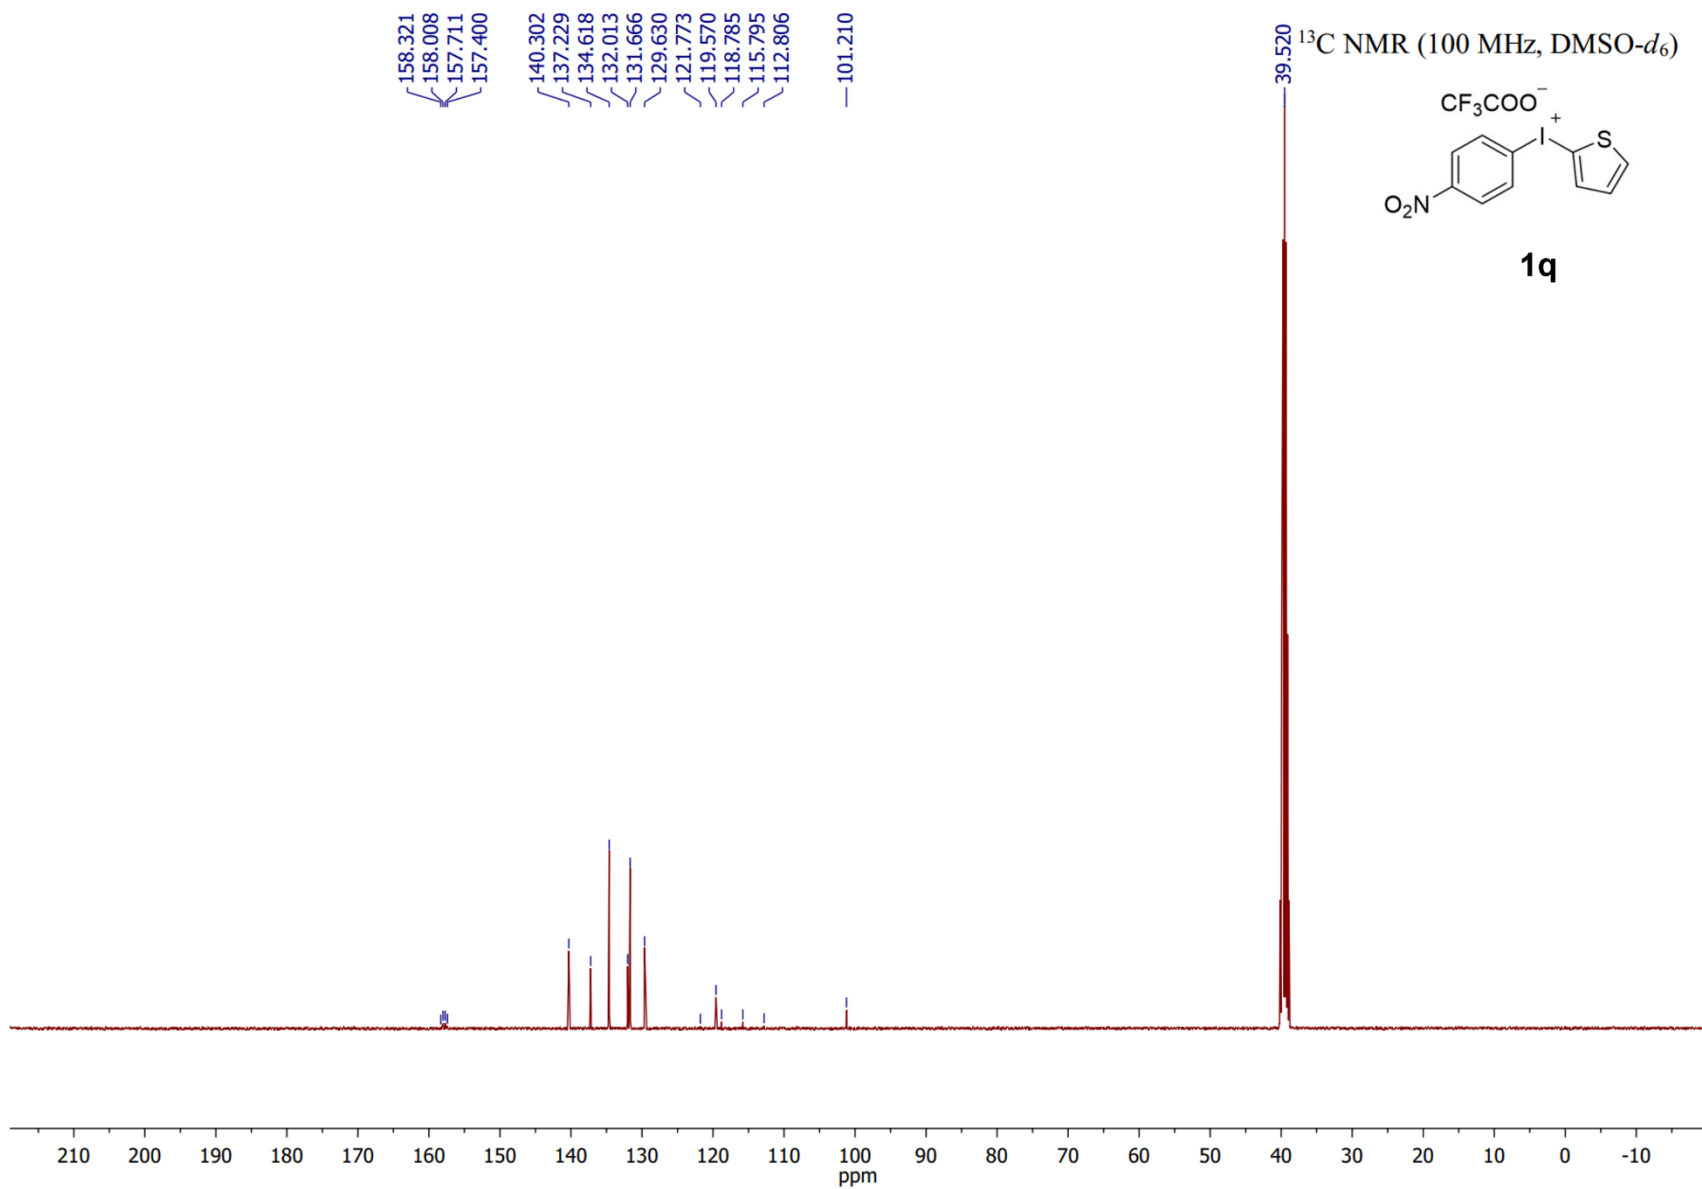

$^{19}\text{F}$  NMR (376 MHz,  $\text{DMSO-}d_6$ )

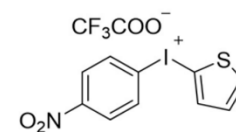

**1q**

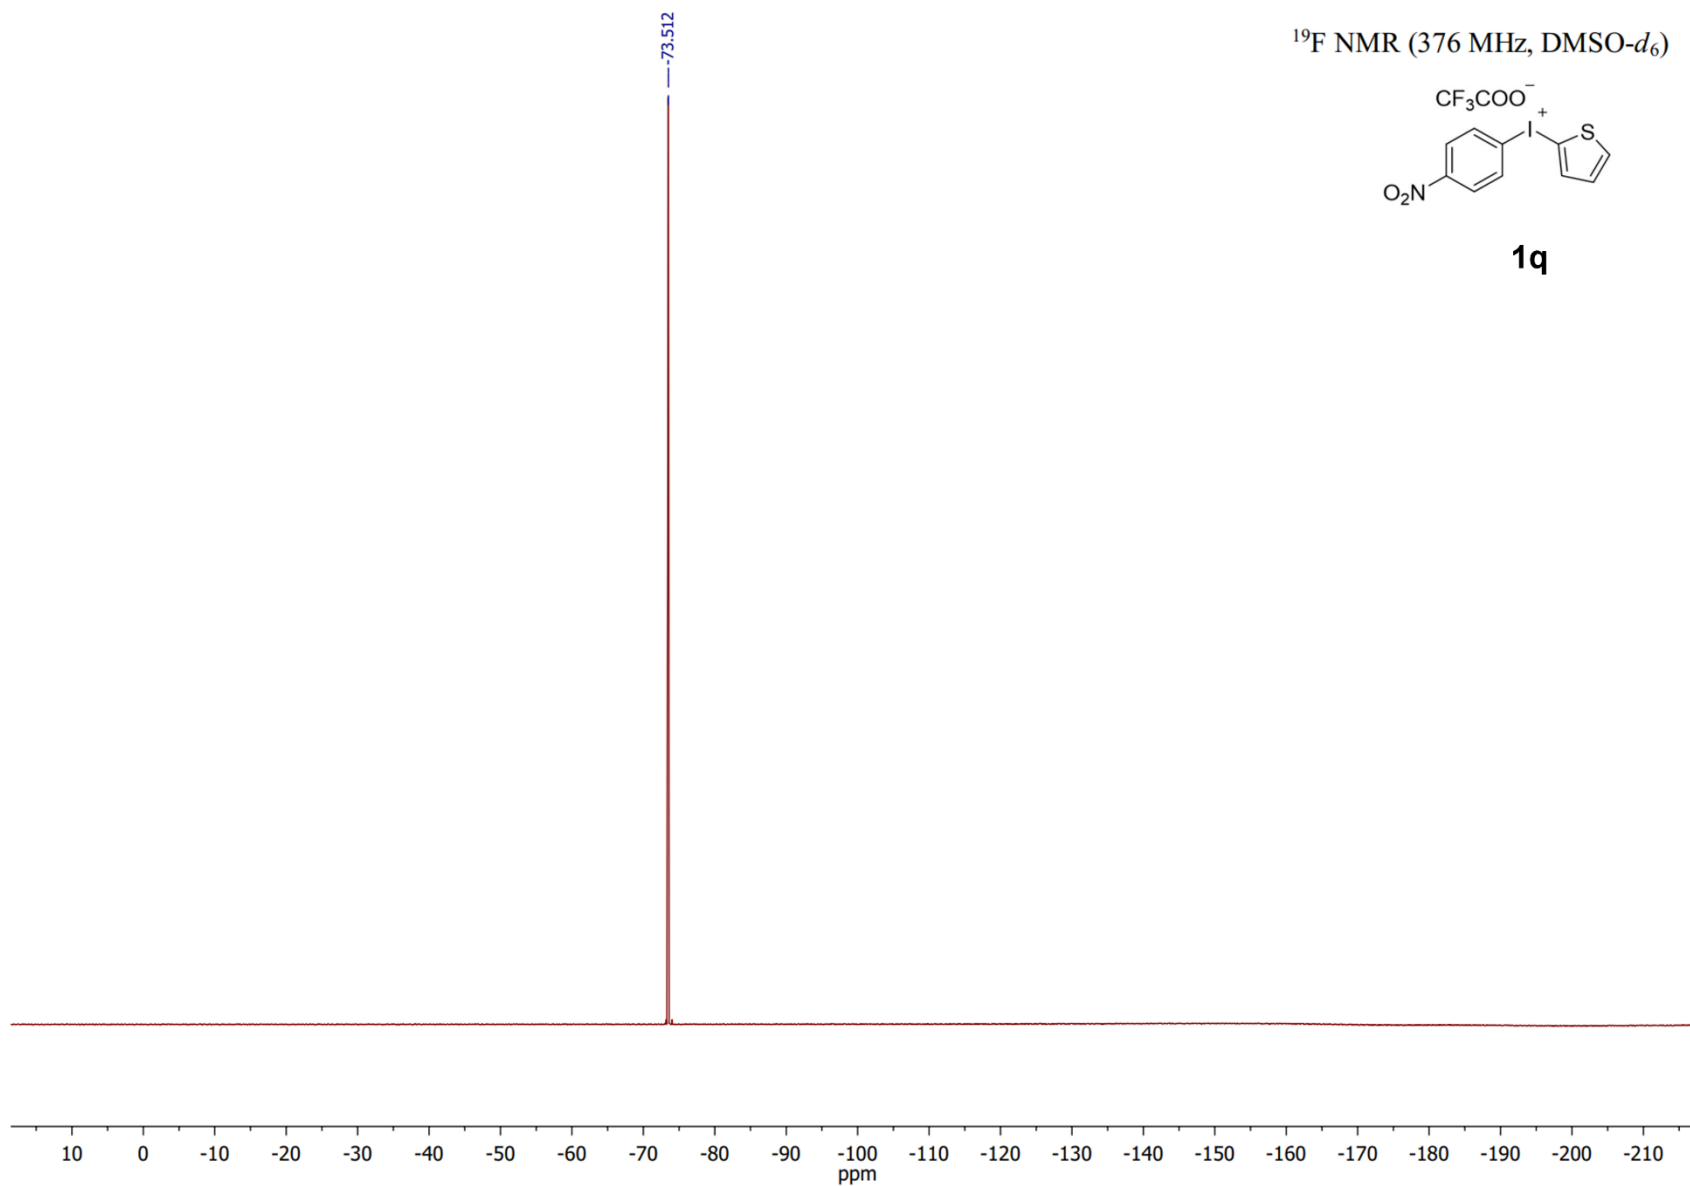

NMR spectra of **2a-k**

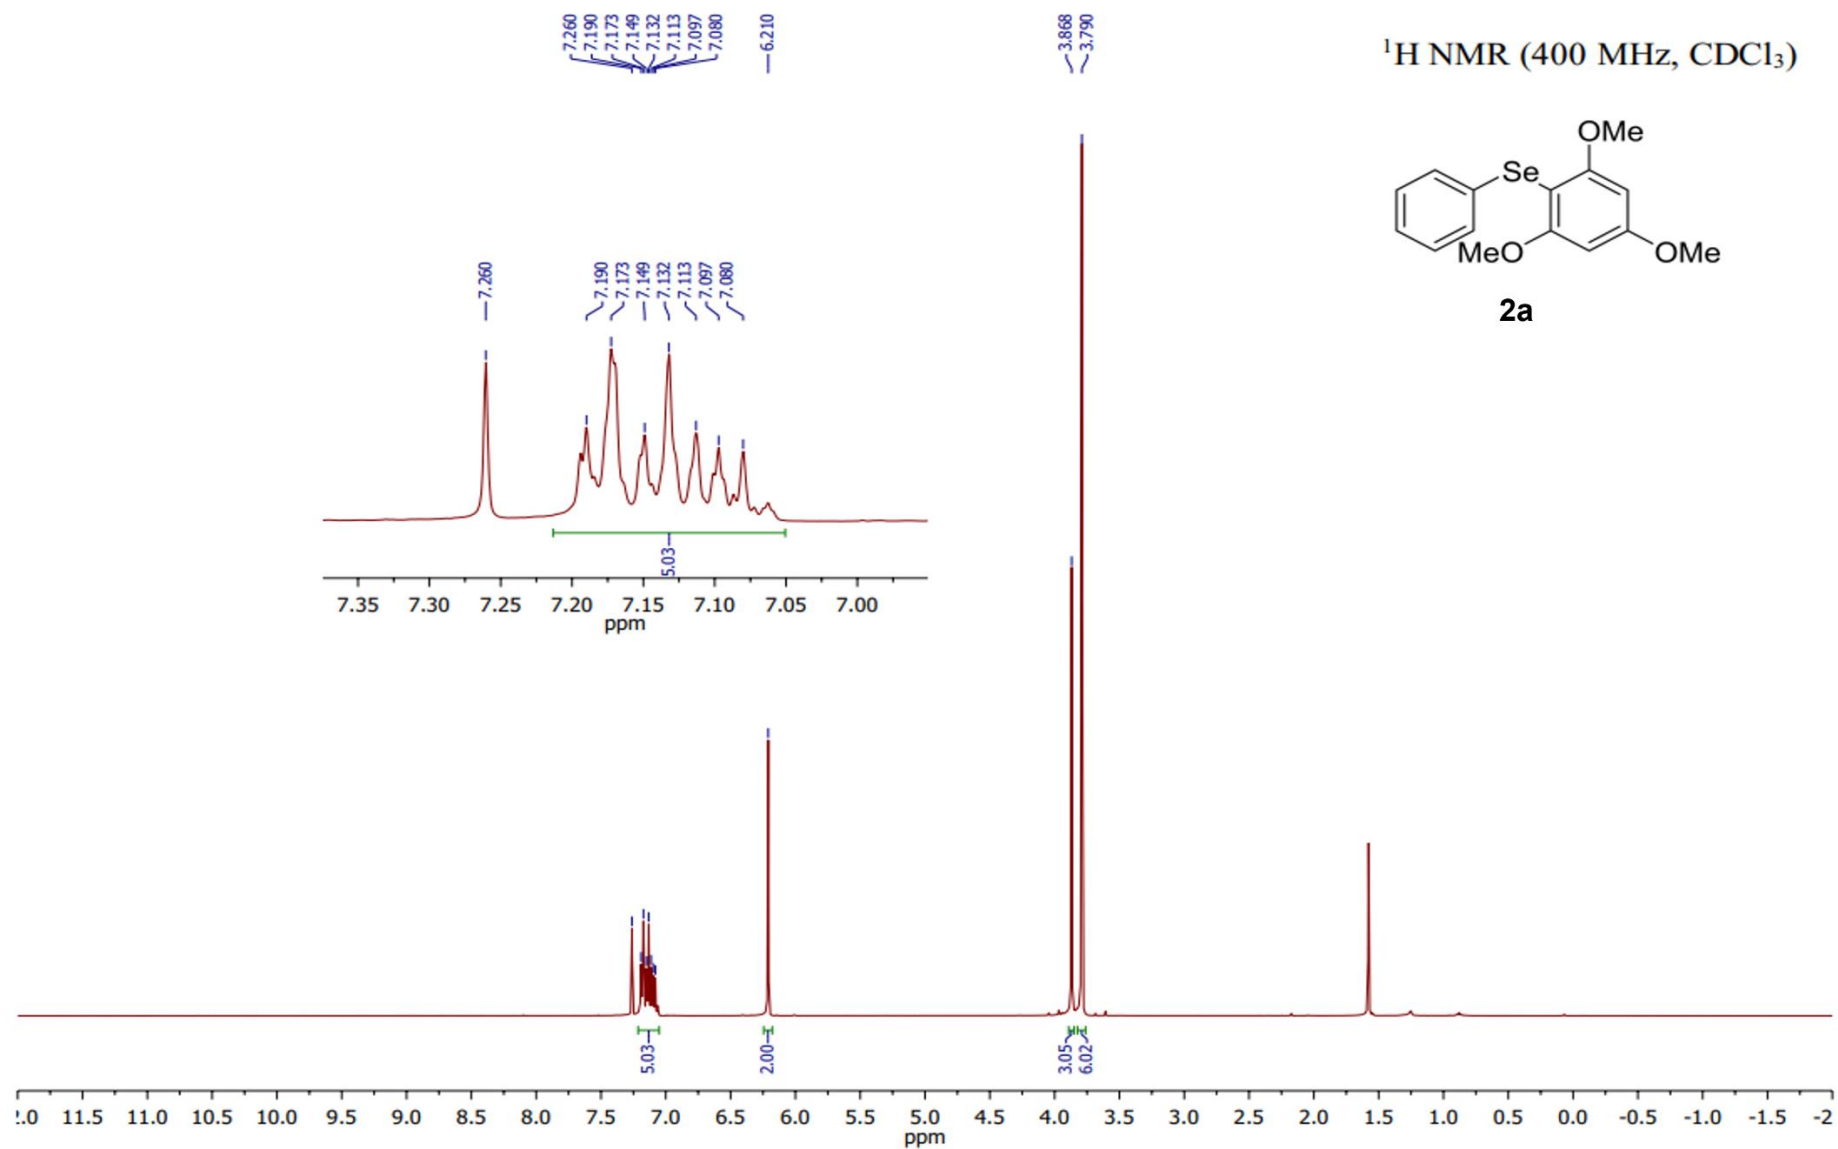

$^{13}\text{C}$  NMR (100 MHz,  $\text{CDCl}_3$ )

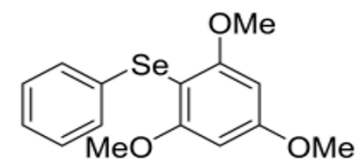

**2a**

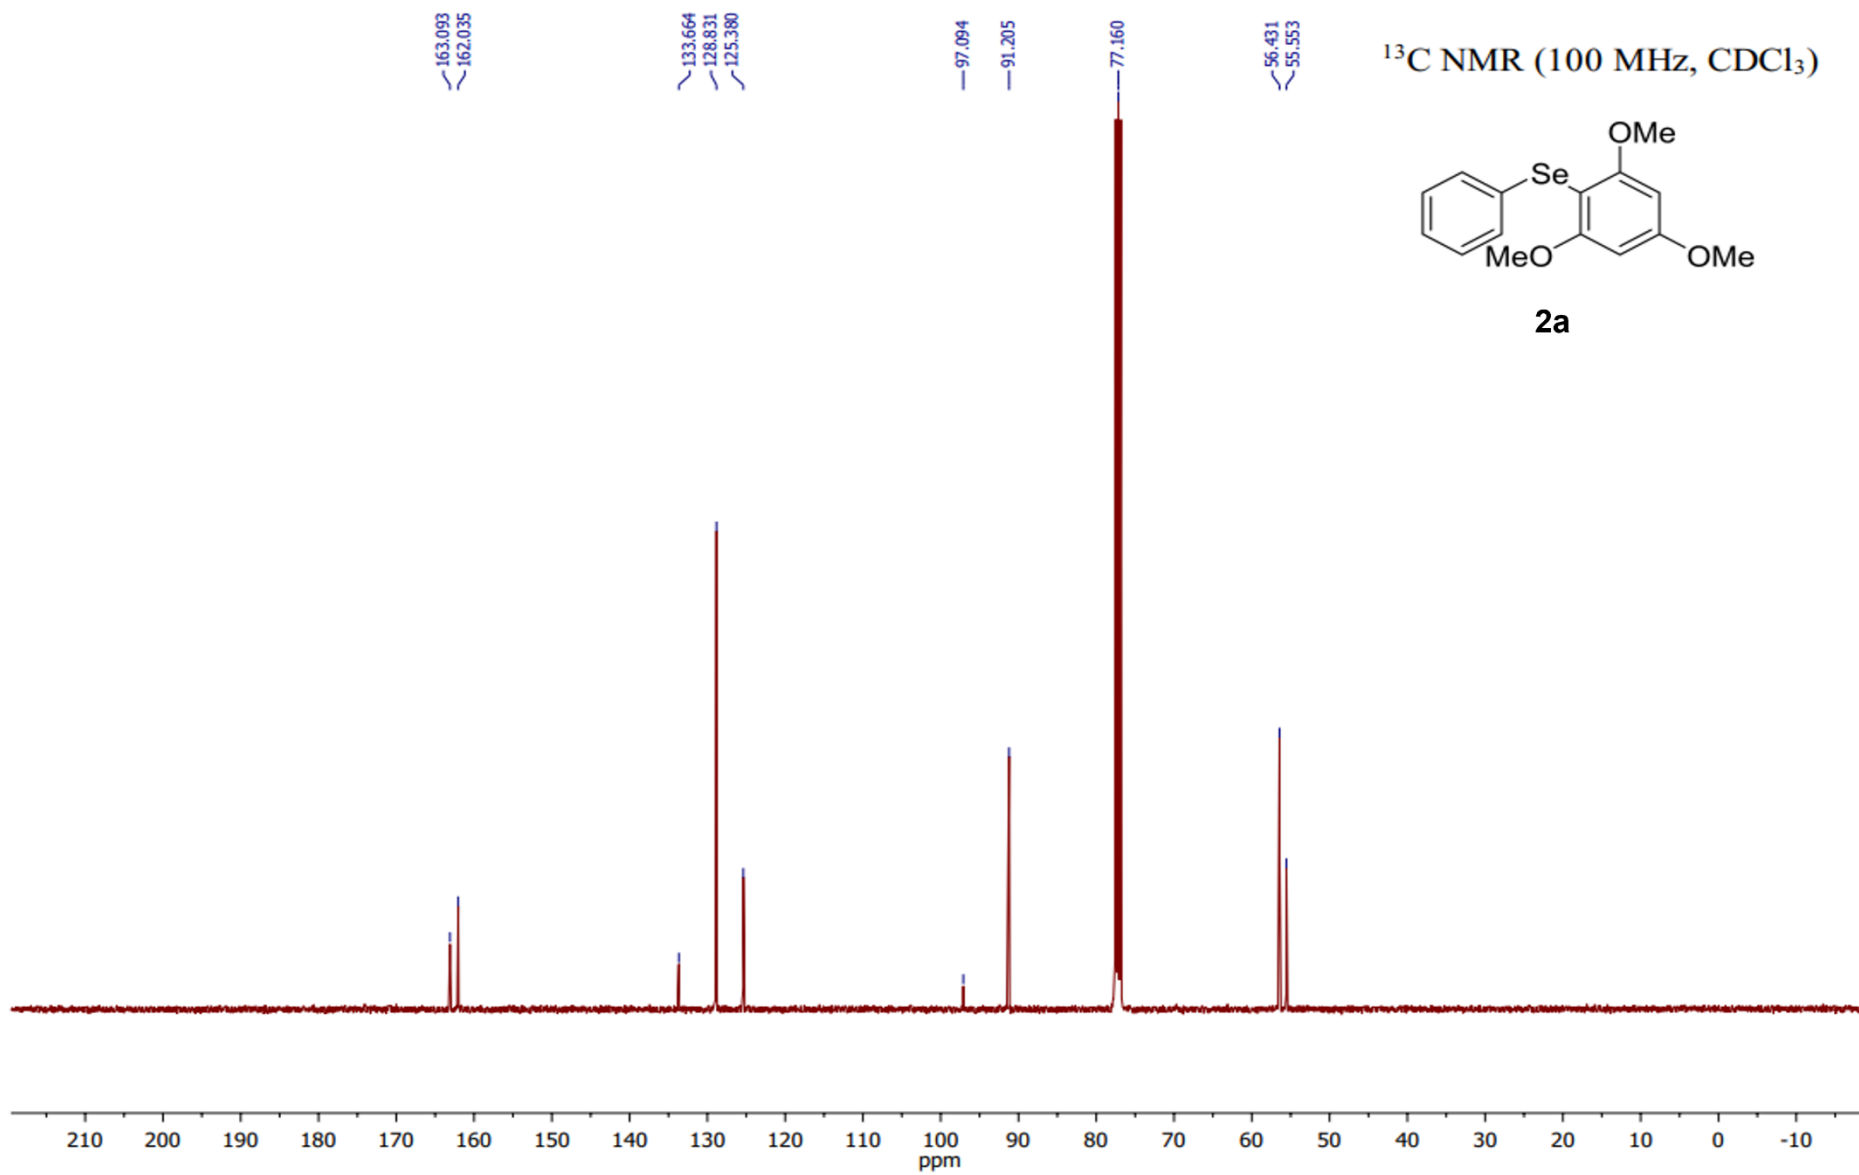

$^{77}\text{Se}$  NMR (76 MHz,  $\text{CDCl}_3$ )

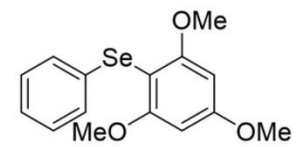

**2a**

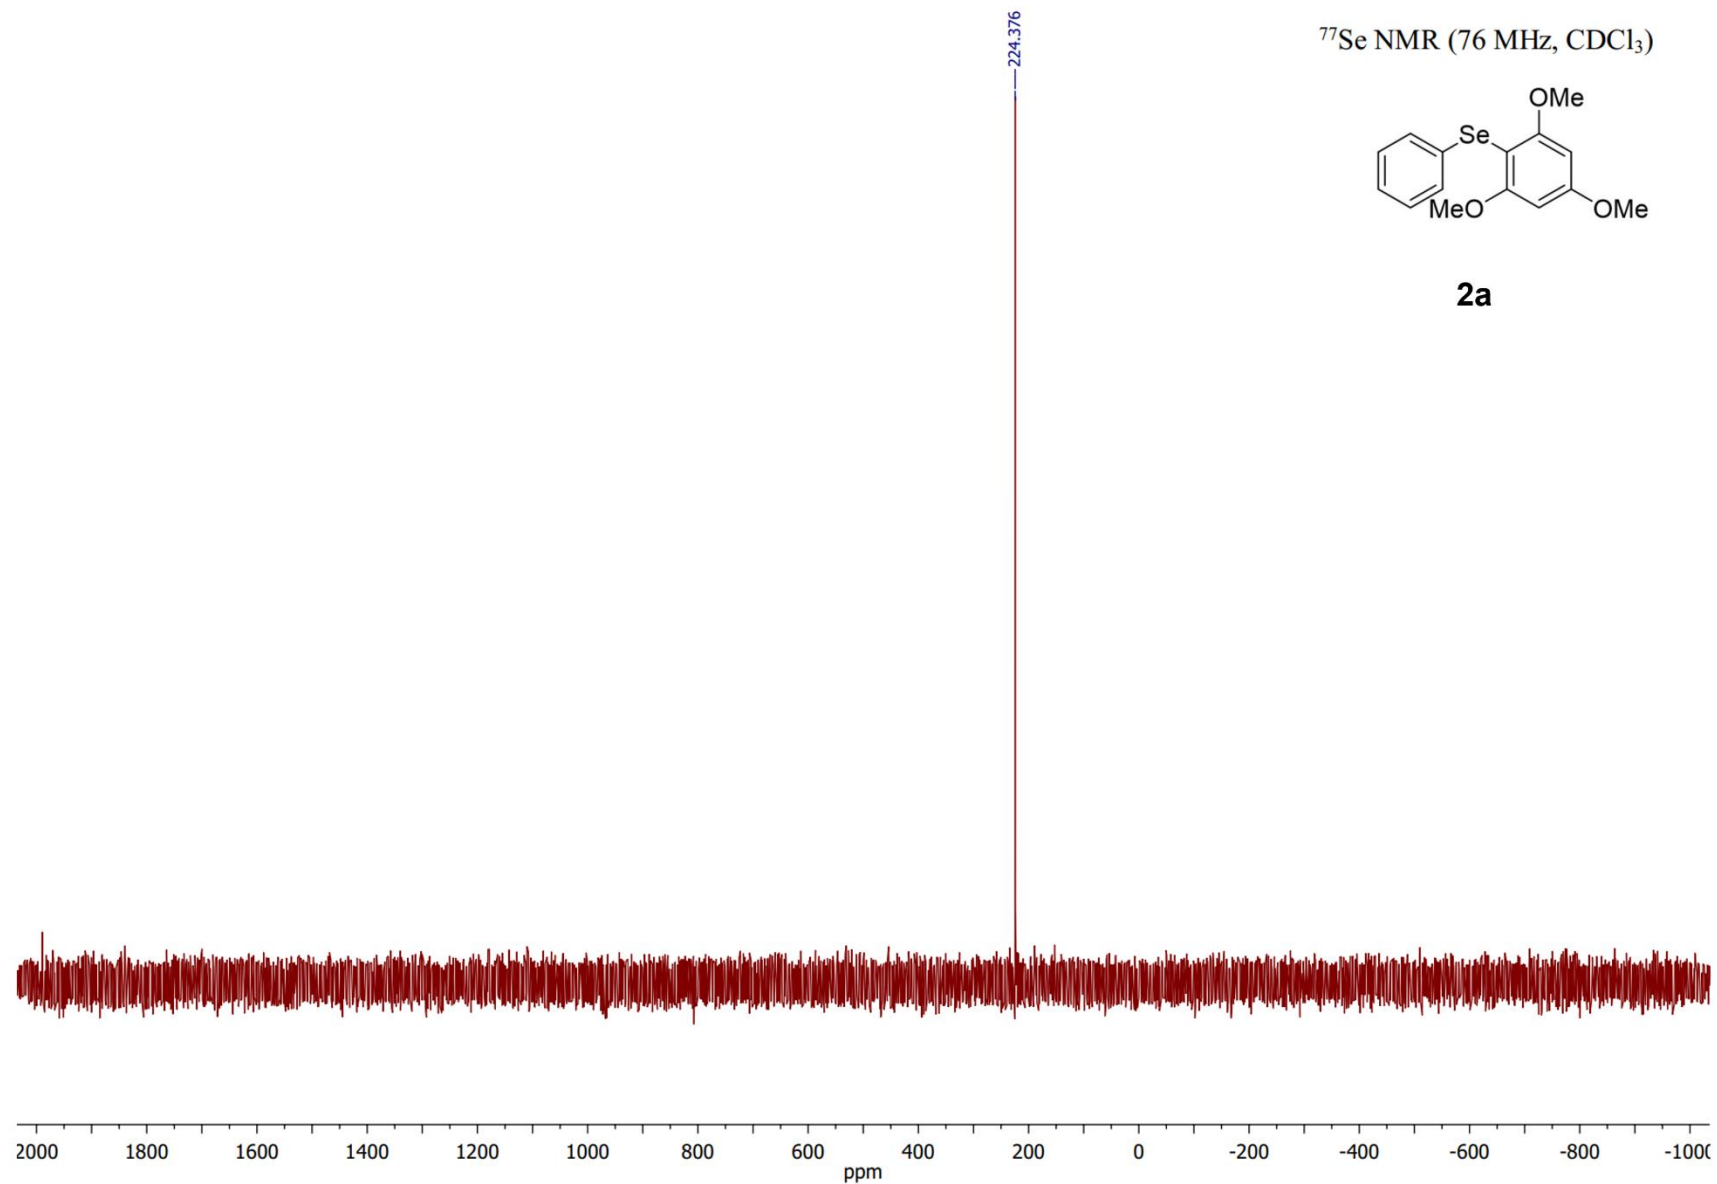

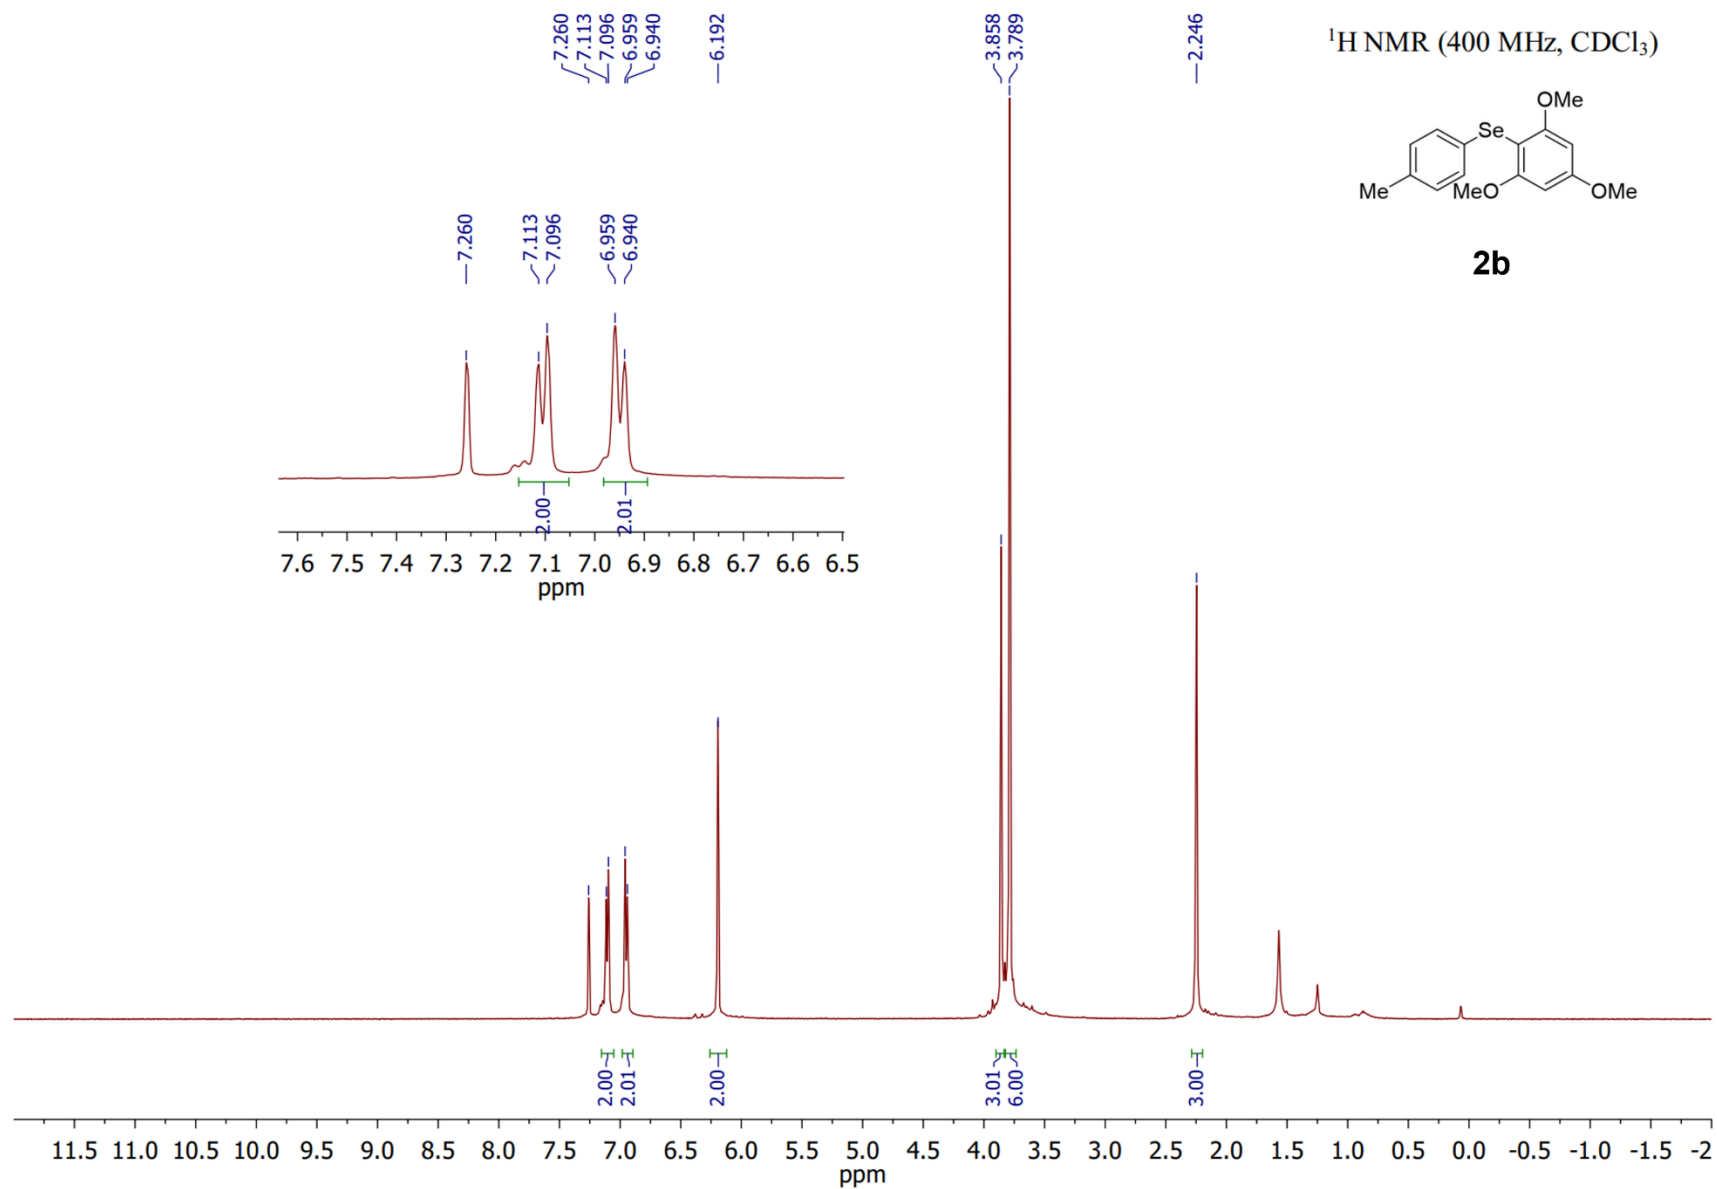

$^{13}\text{C}$  NMR (100 MHz,  $\text{CDCl}_3$ )

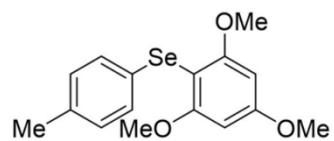

**2b**

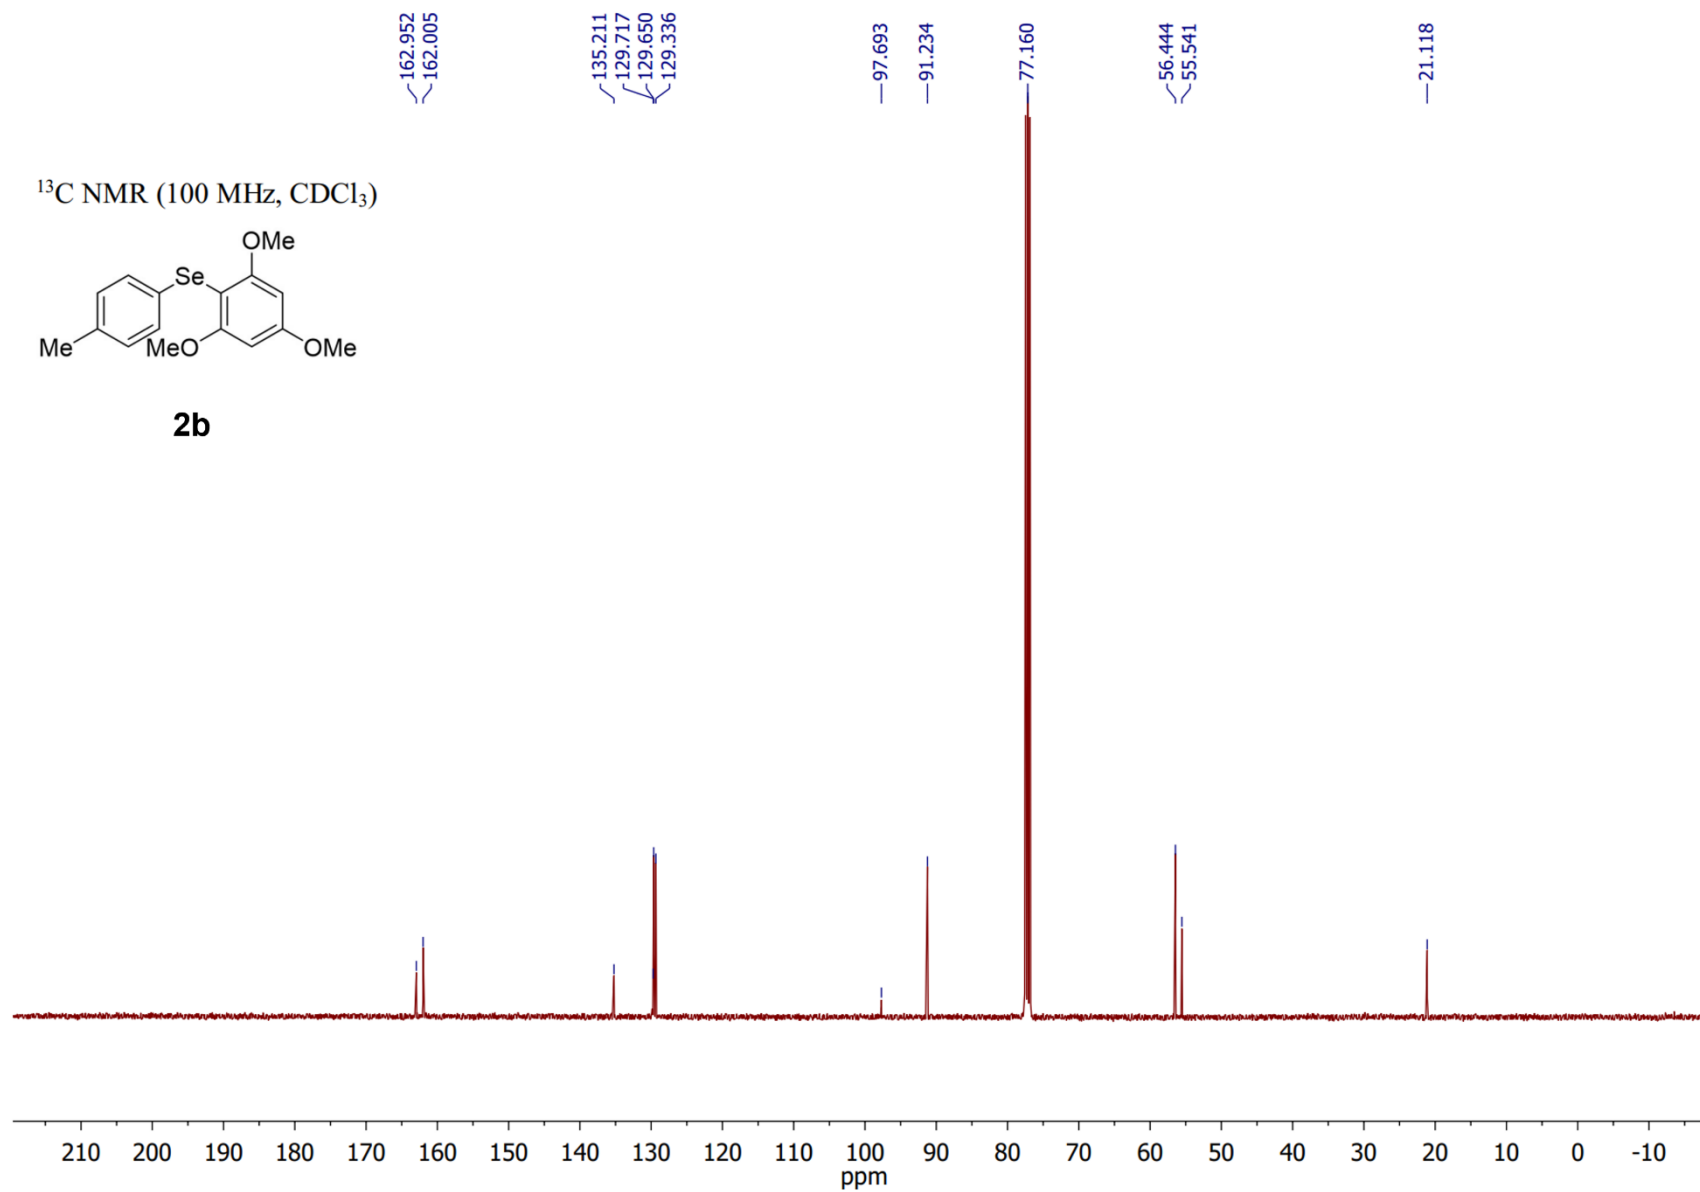

$^{77}\text{Se}$  NMR (76 MHz,  $\text{CDCl}_3$ )

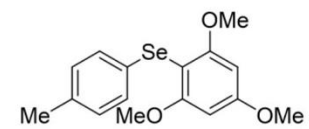

**2b**

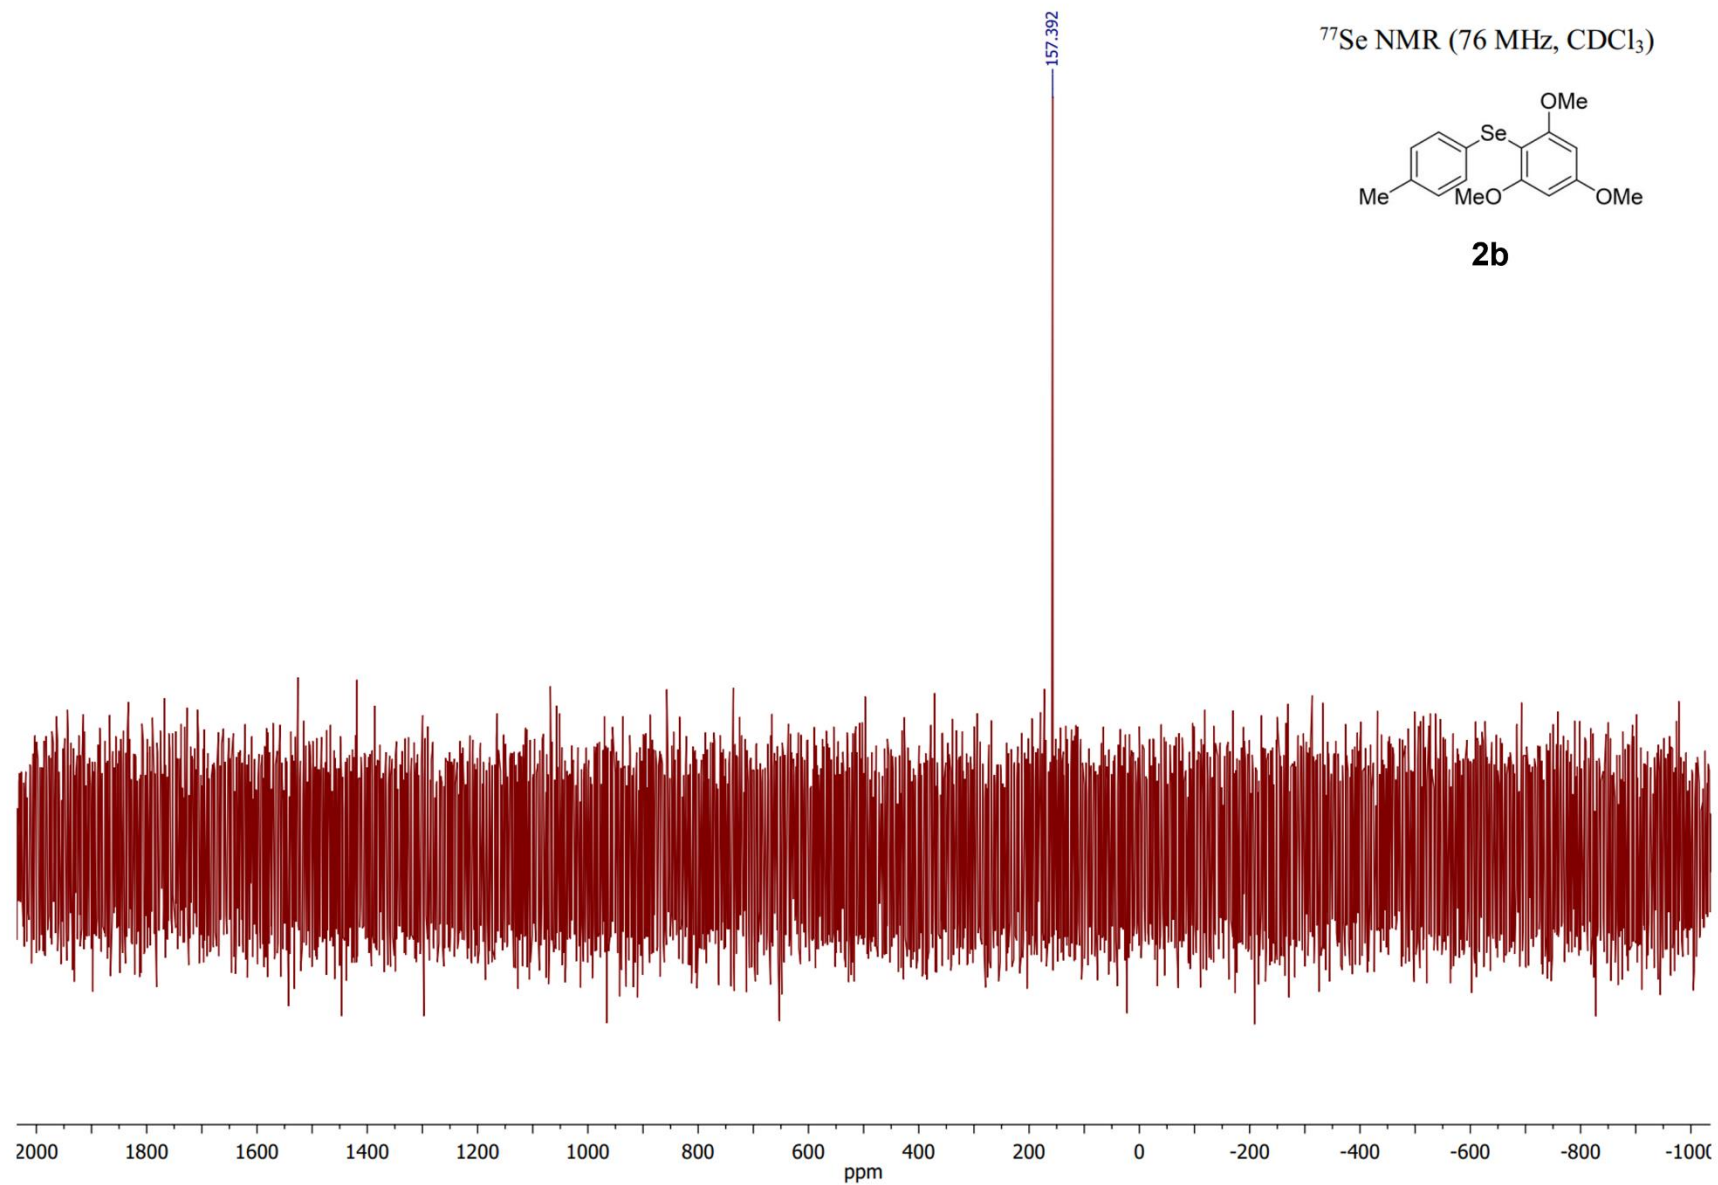



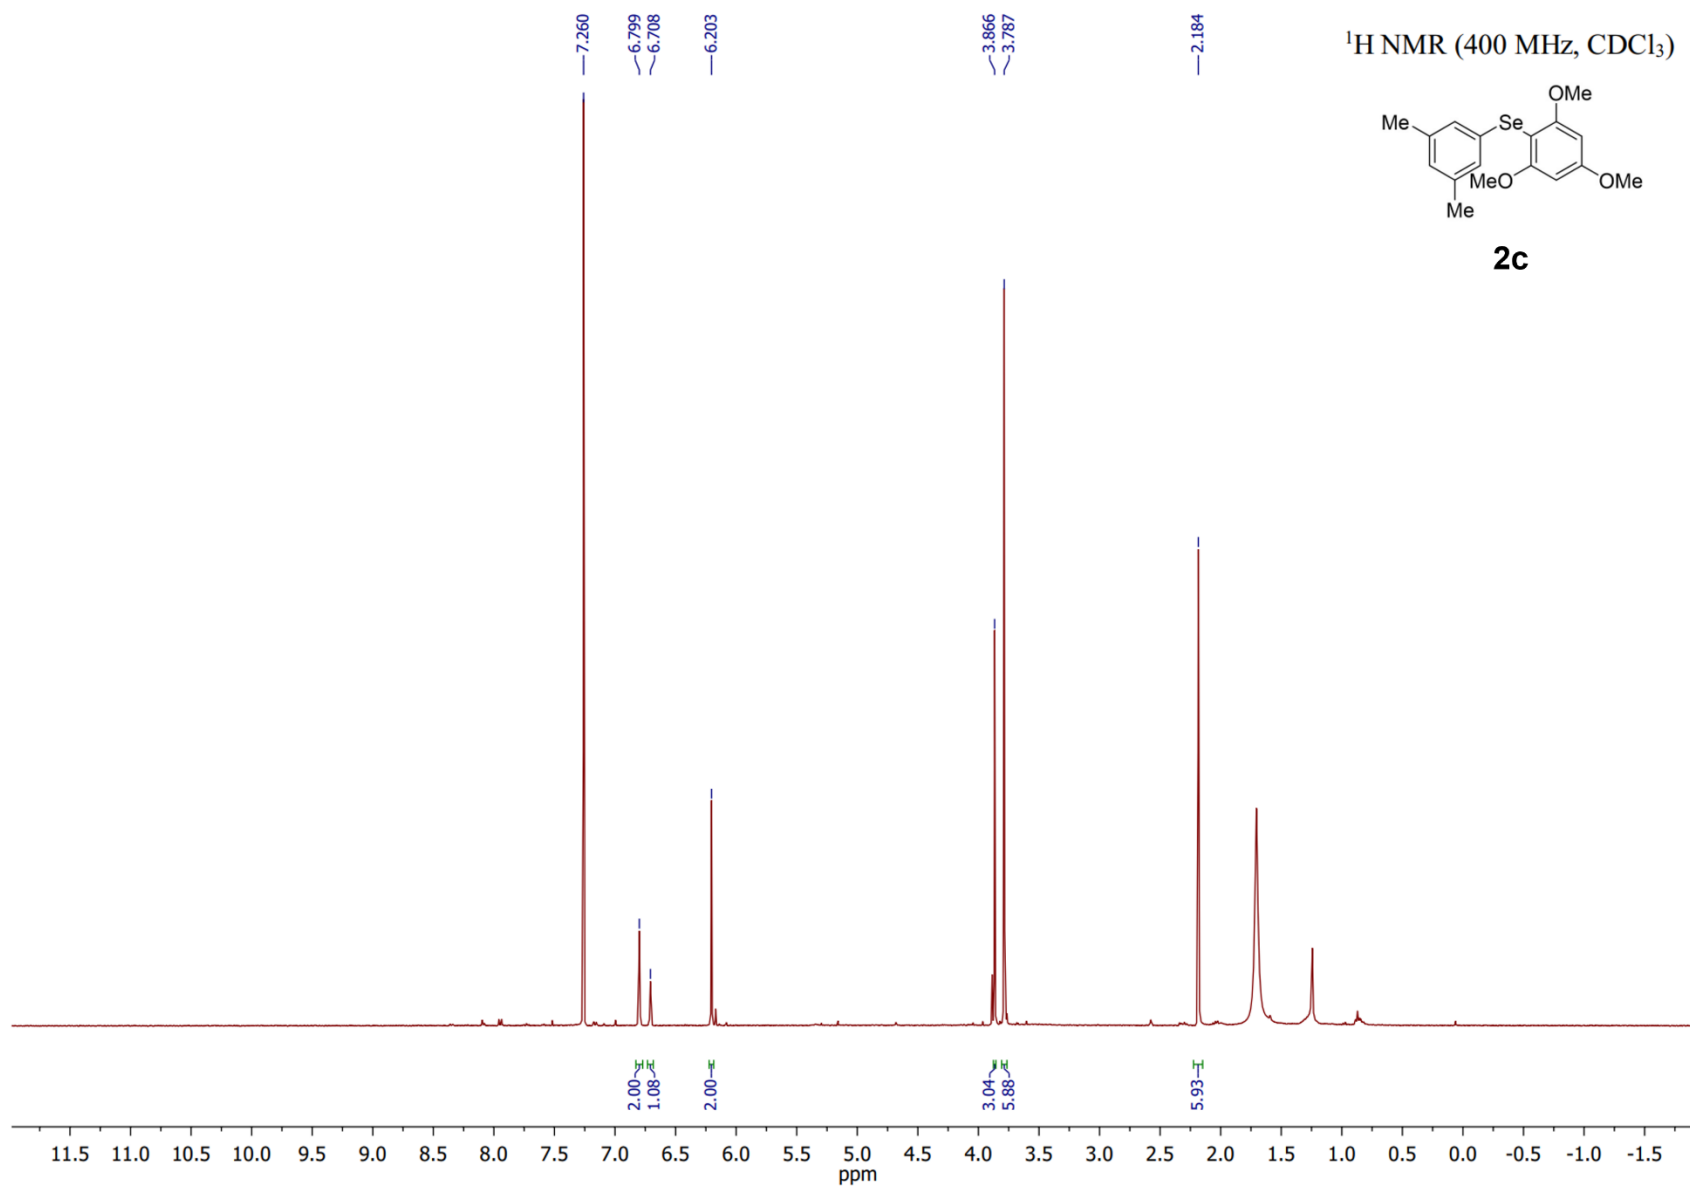

$^{13}\text{C}$  NMR (100 MHz,  $\text{CDCl}_3$ )

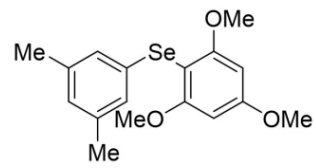

162.978  
162.097

138.277  
133.126  
127.418  
126.543

97.356  
91.297

77.160

56.460  
55.532

21.351

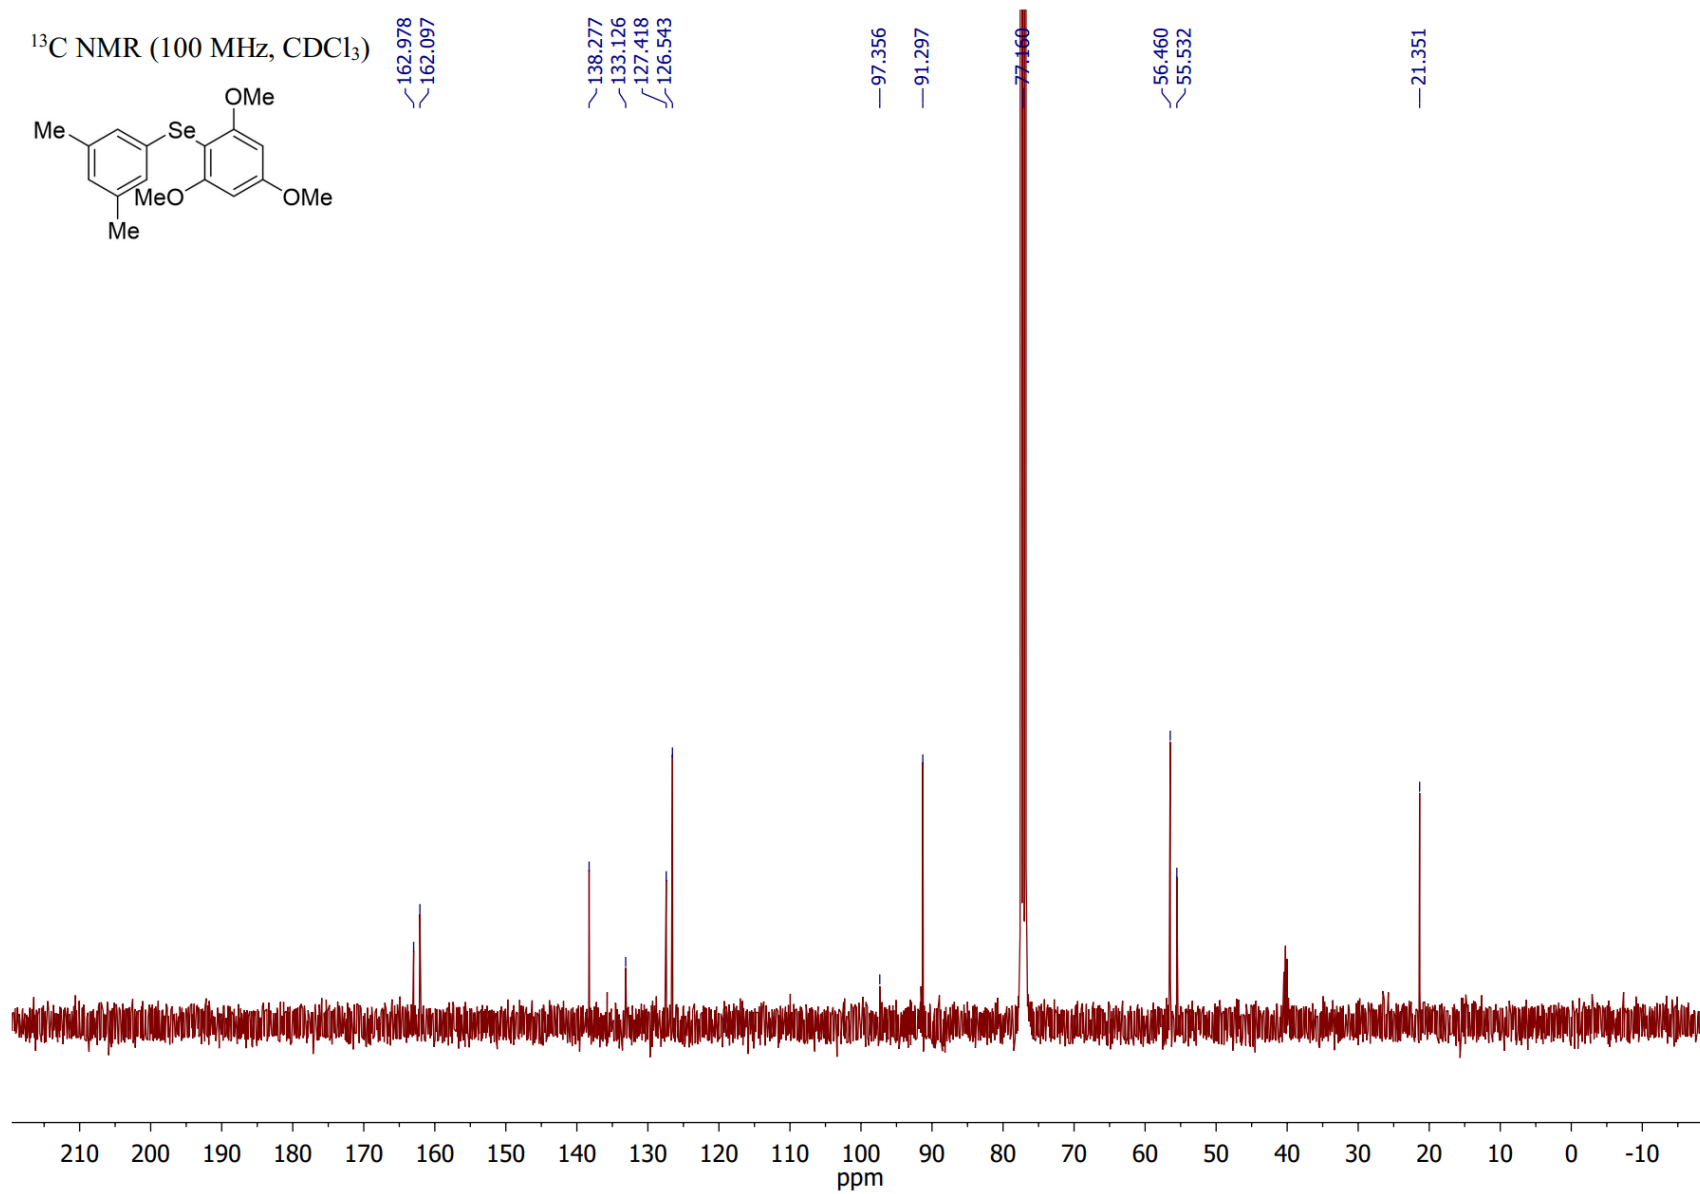

$^{77}\text{Se}$  NMR (76 MHz,  $\text{CDCl}_3$ )

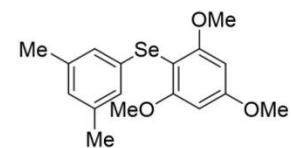

**2c**

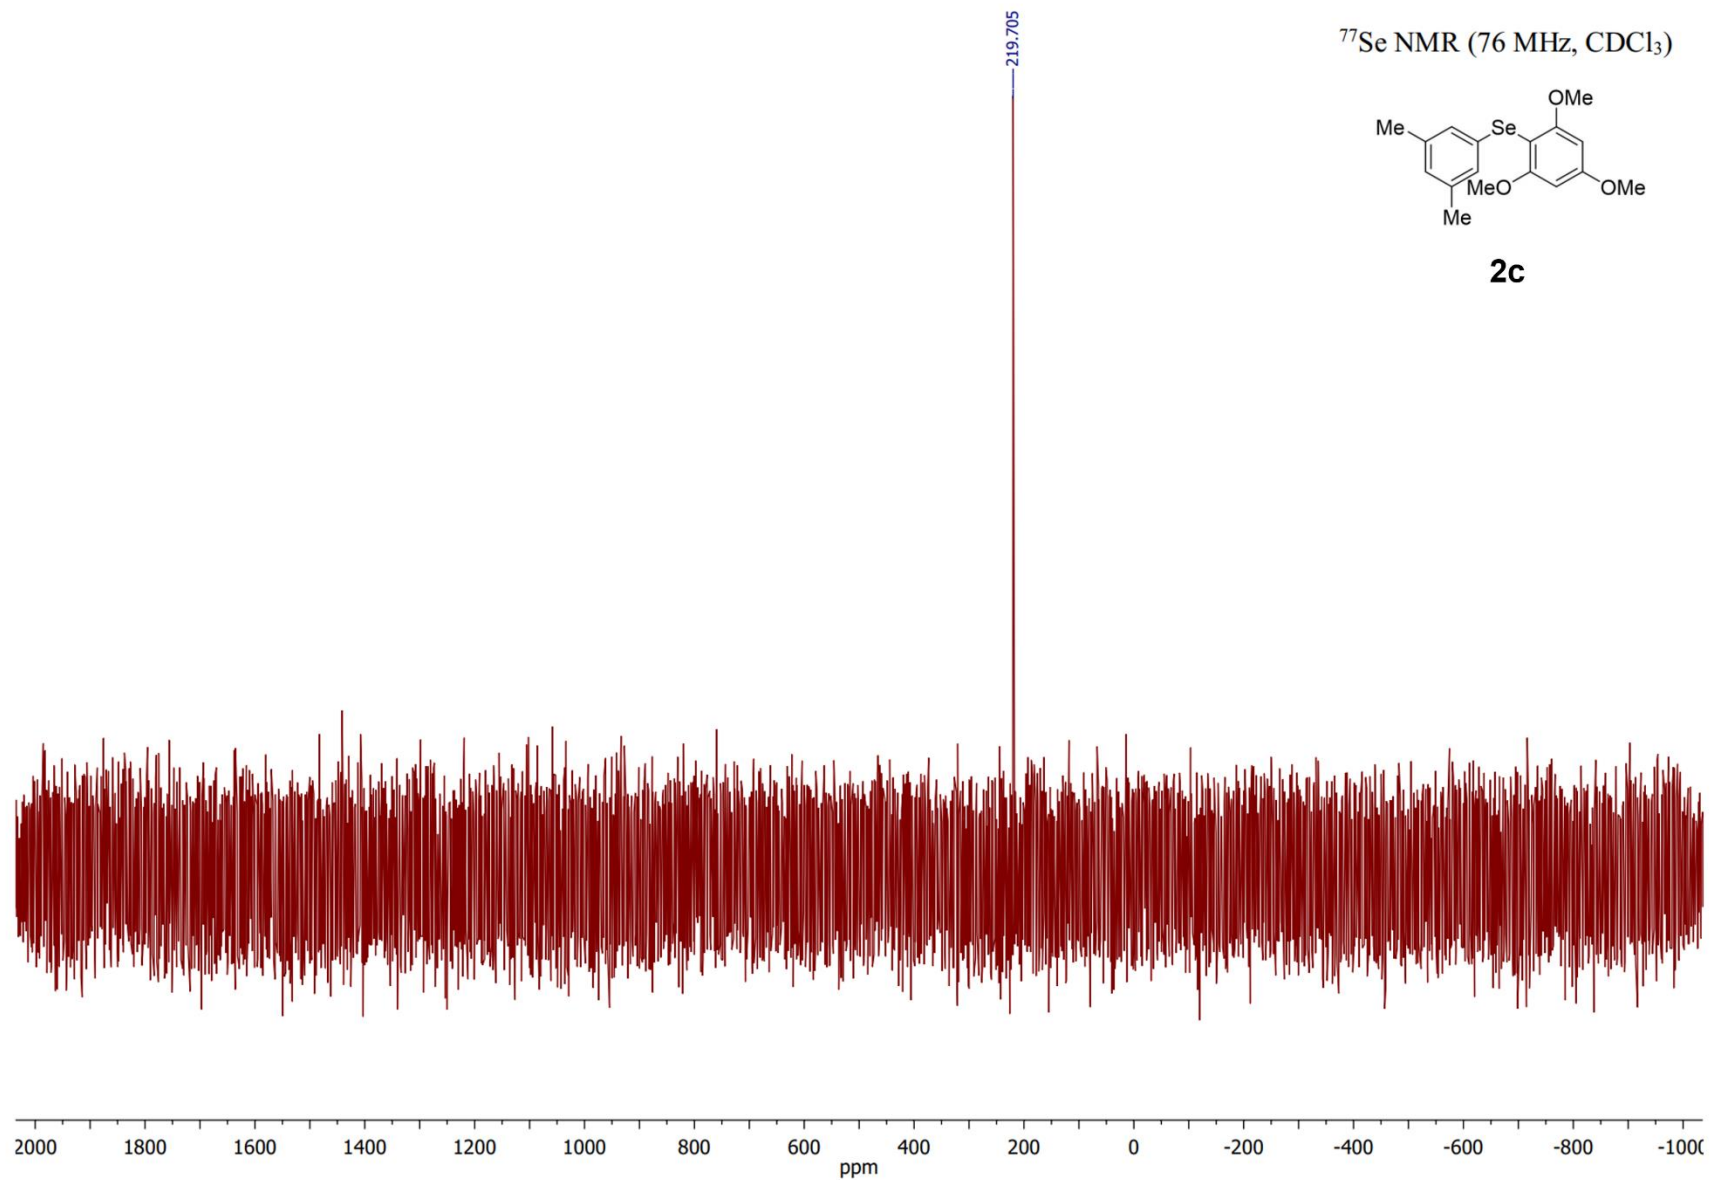

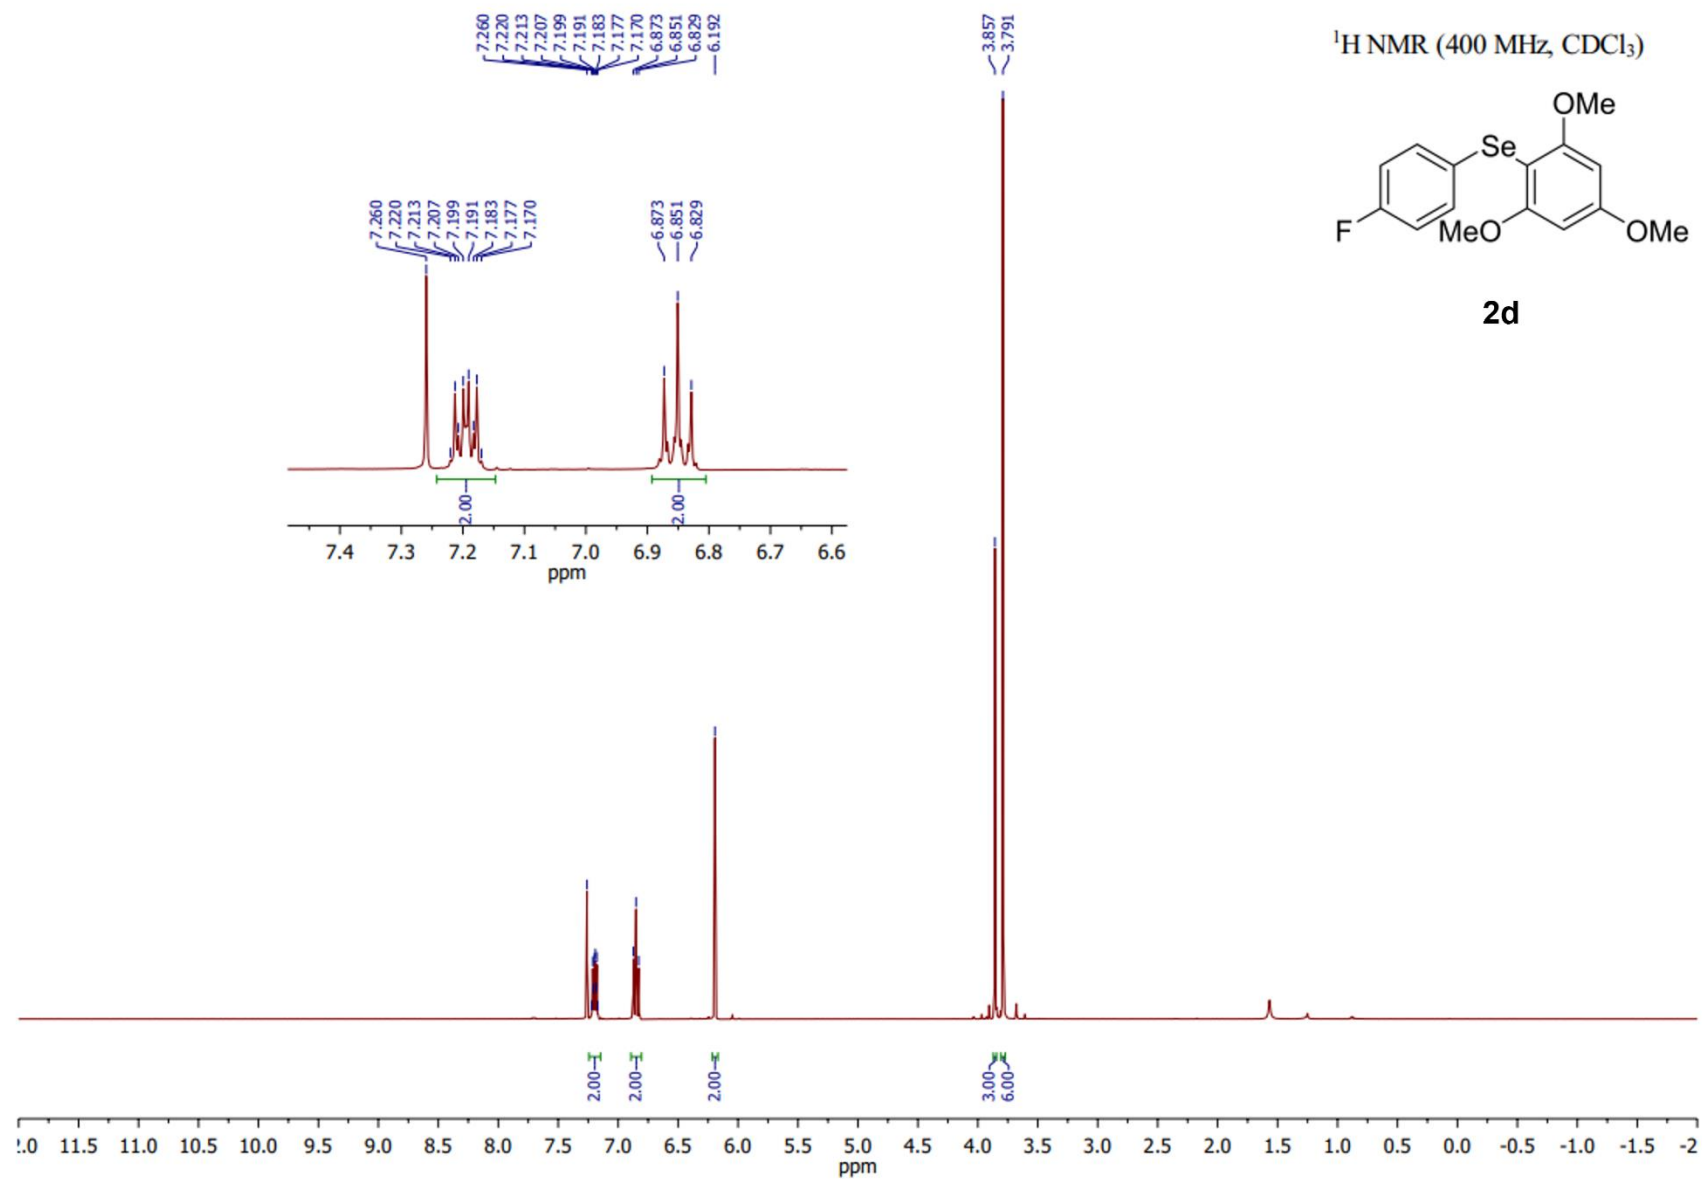

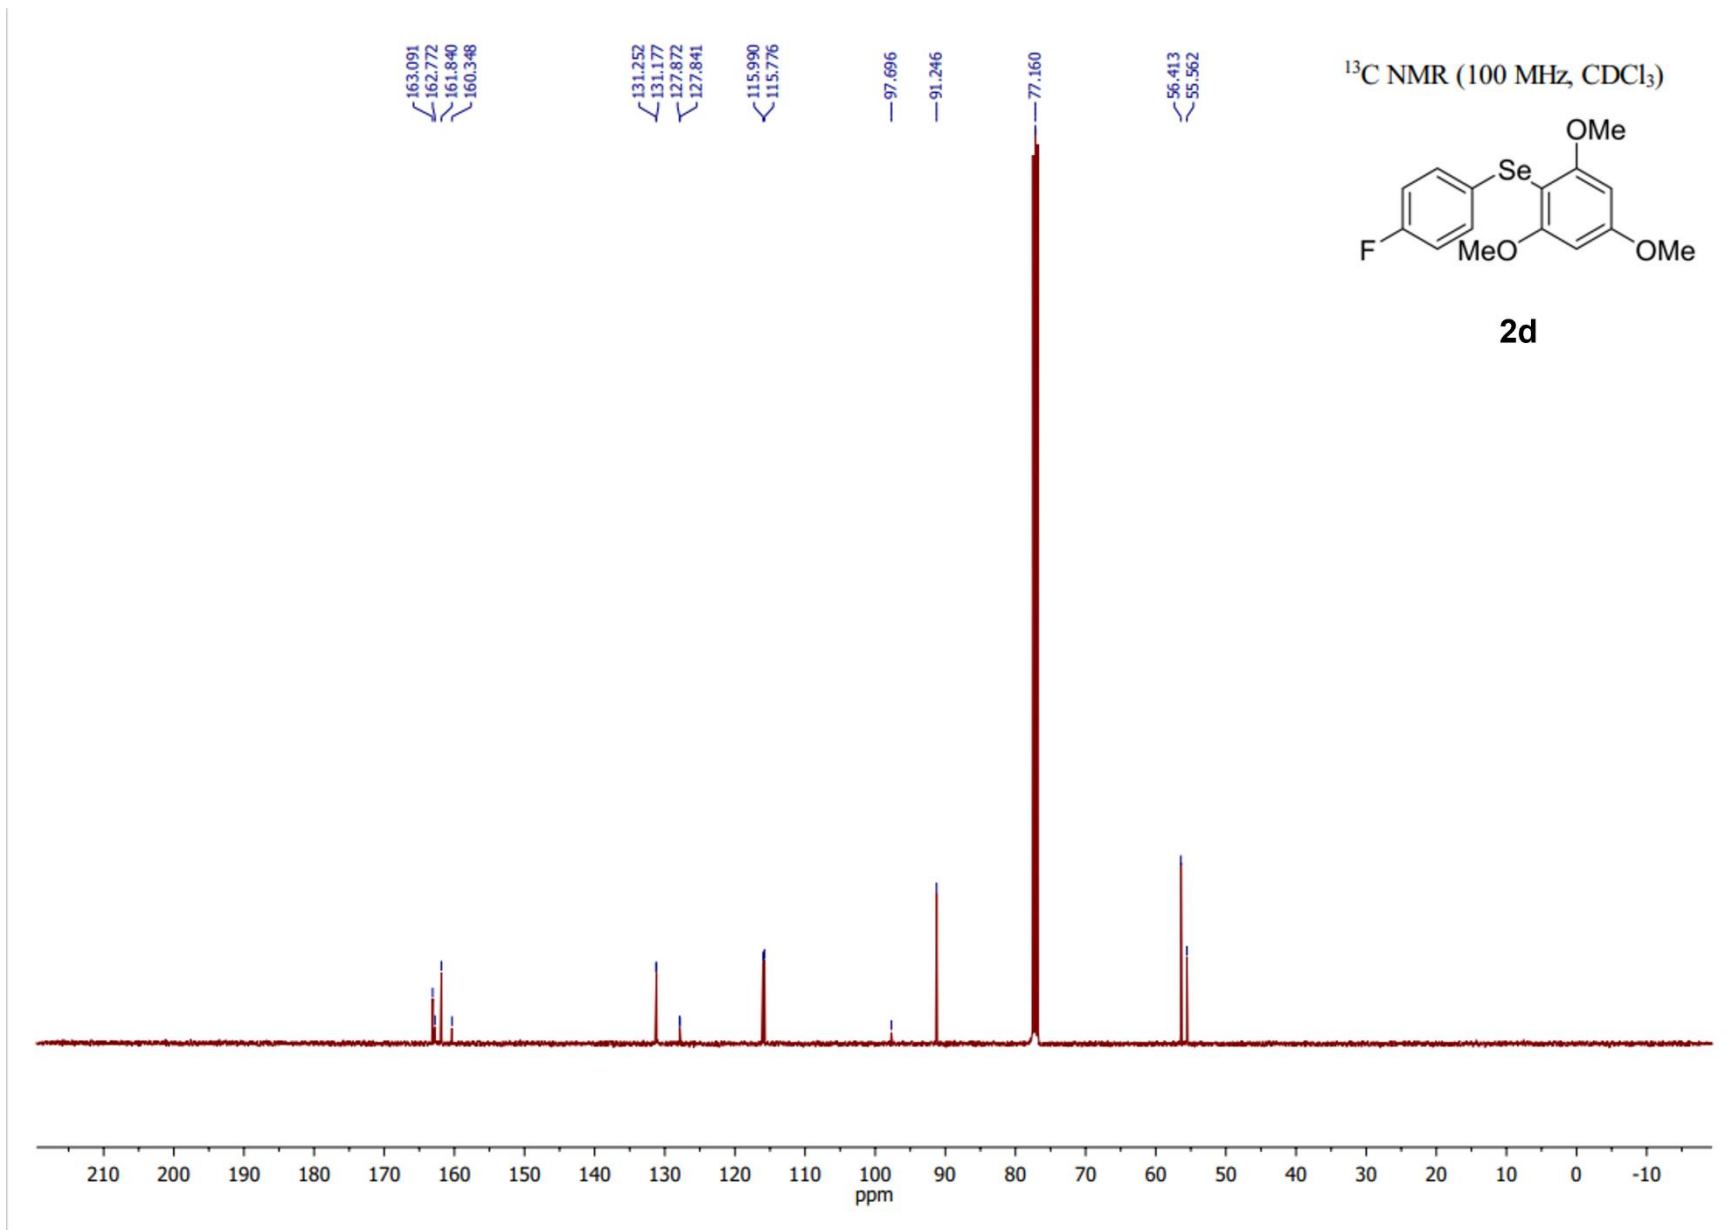

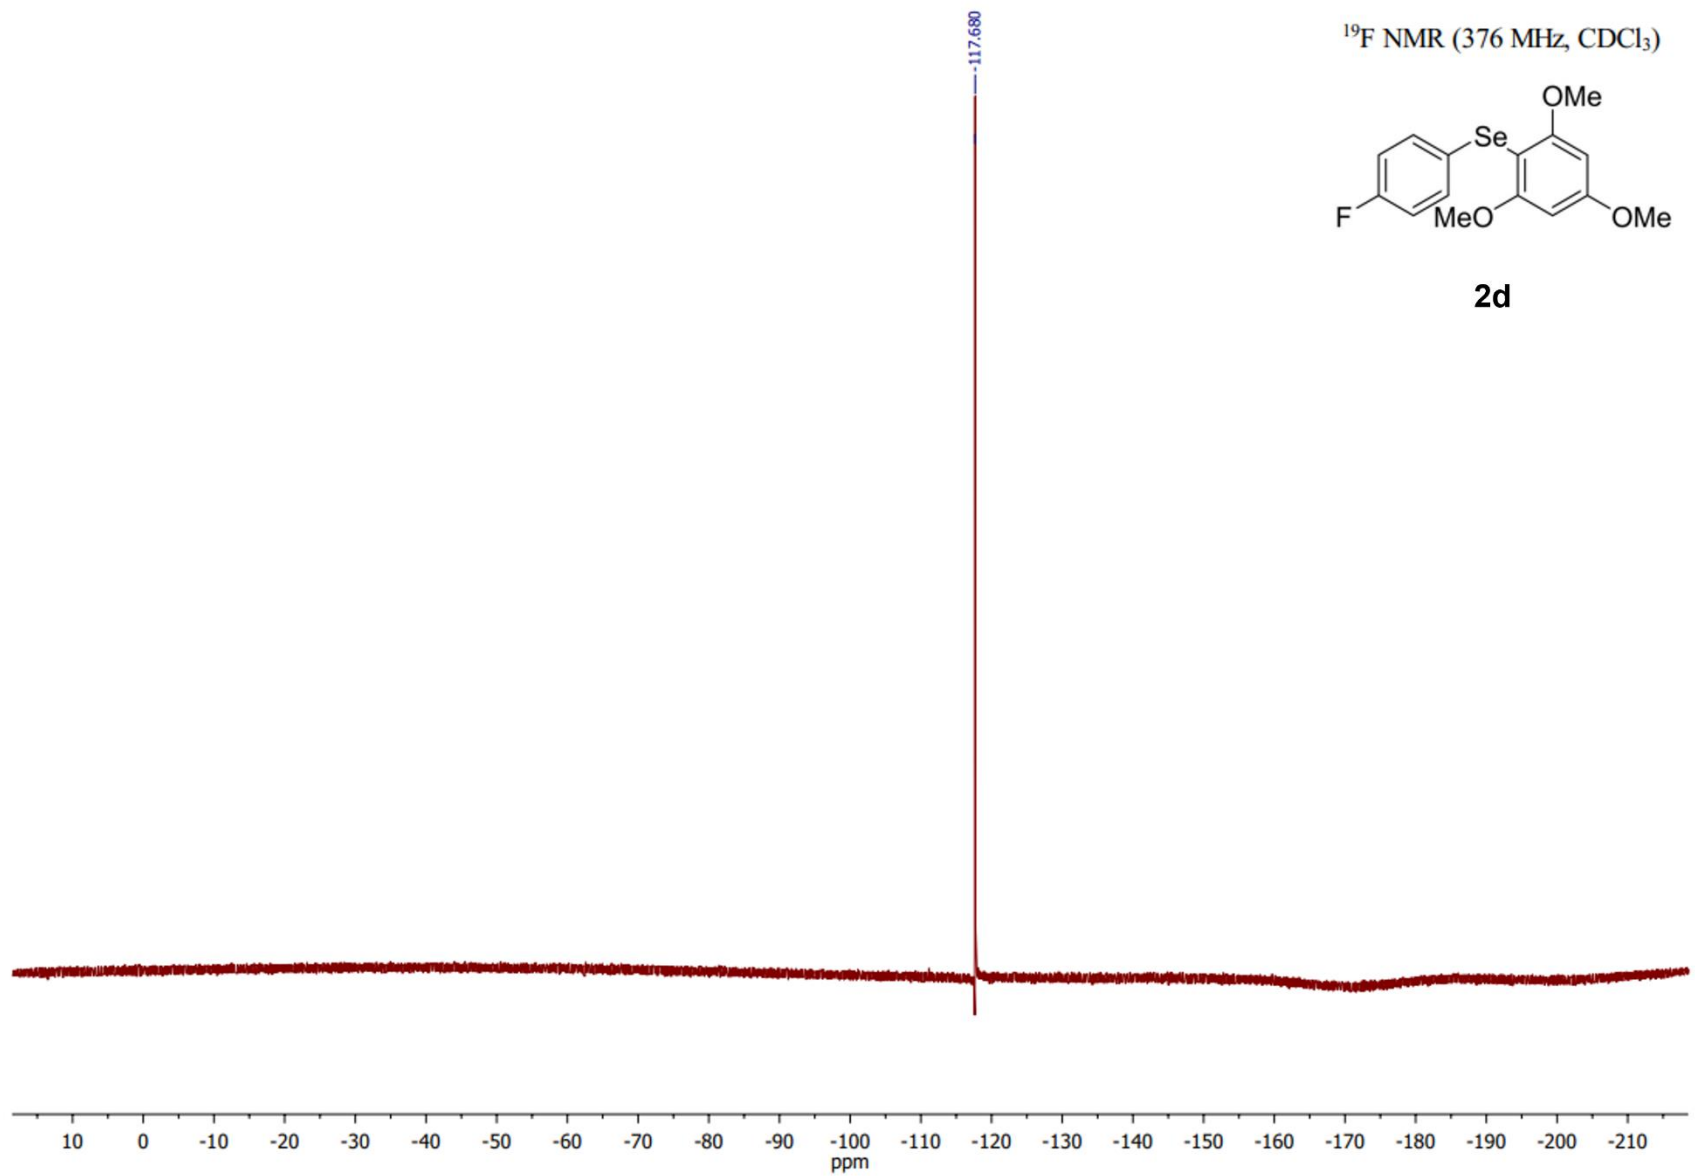

$^{77}\text{Se}$  NMR (76 MHz,  $\text{CDCl}_3$ )

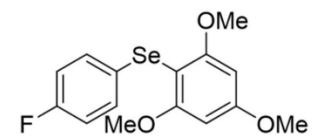

**2d**

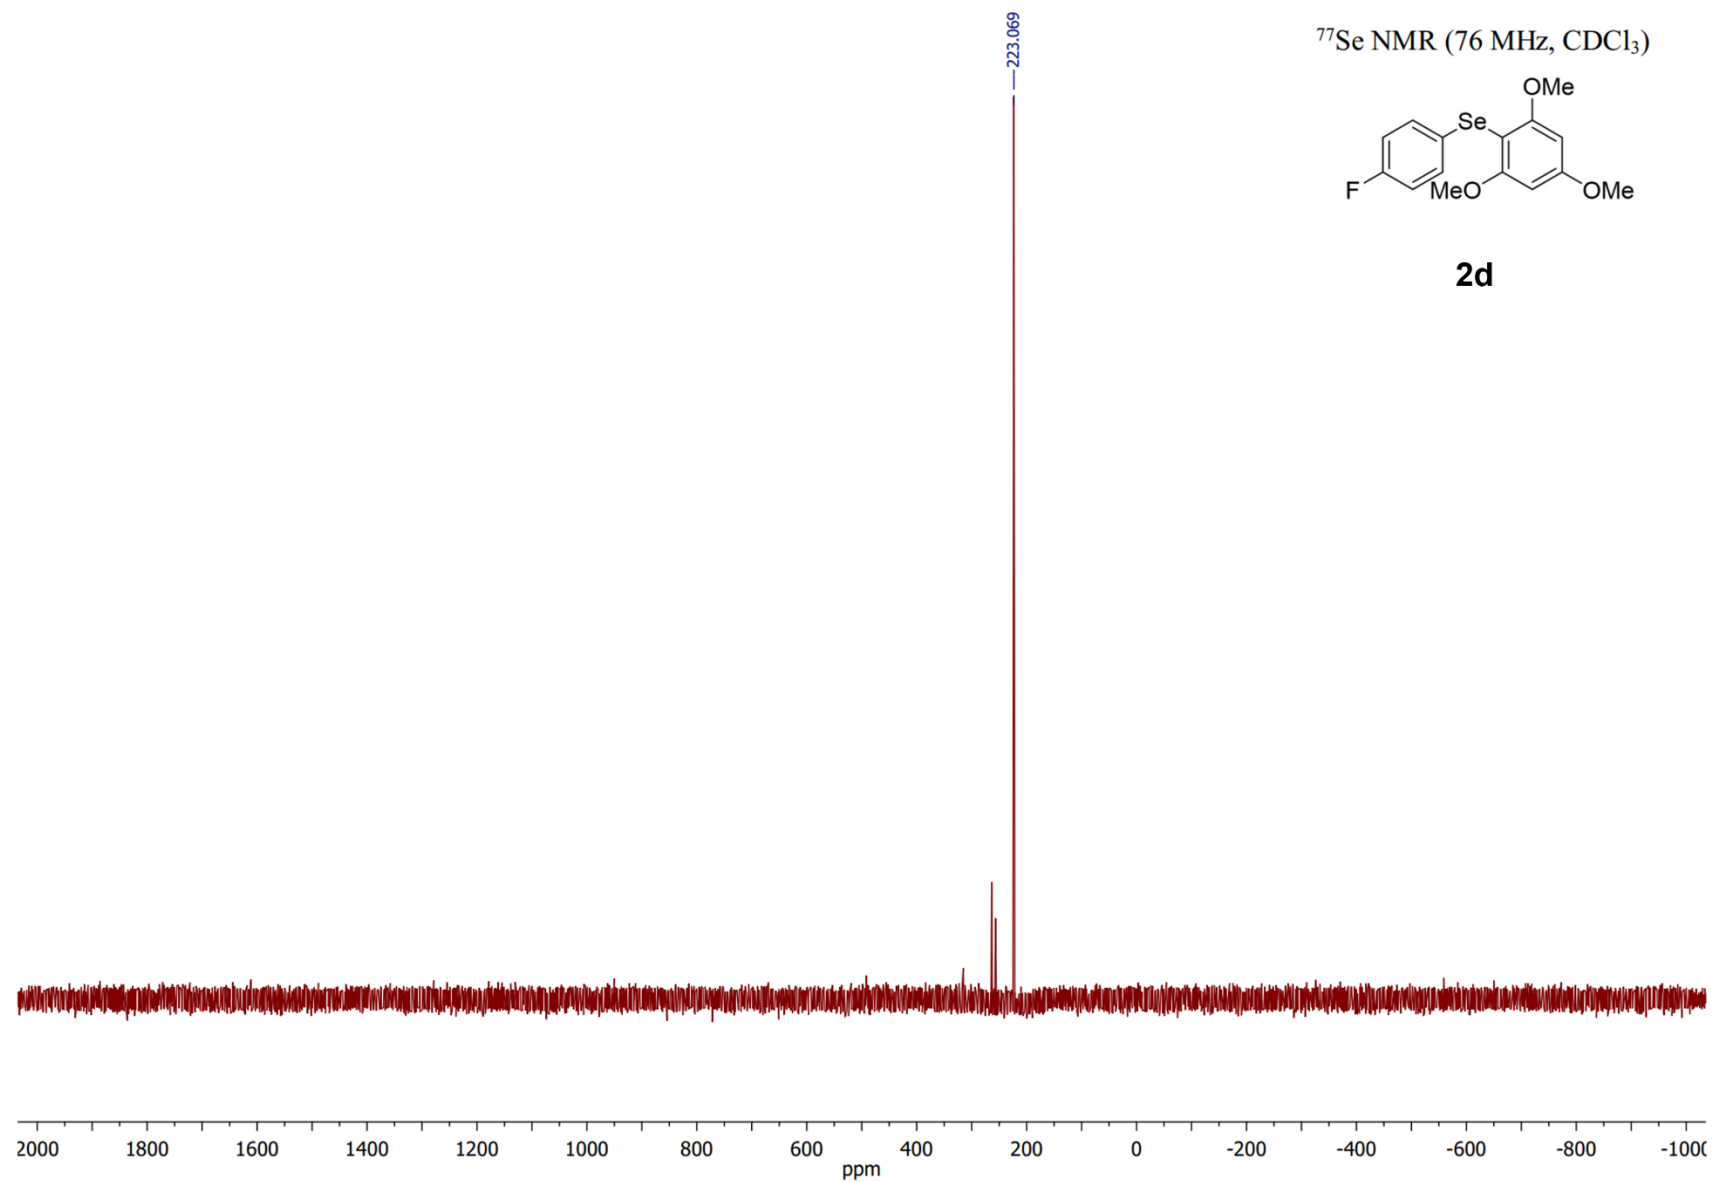

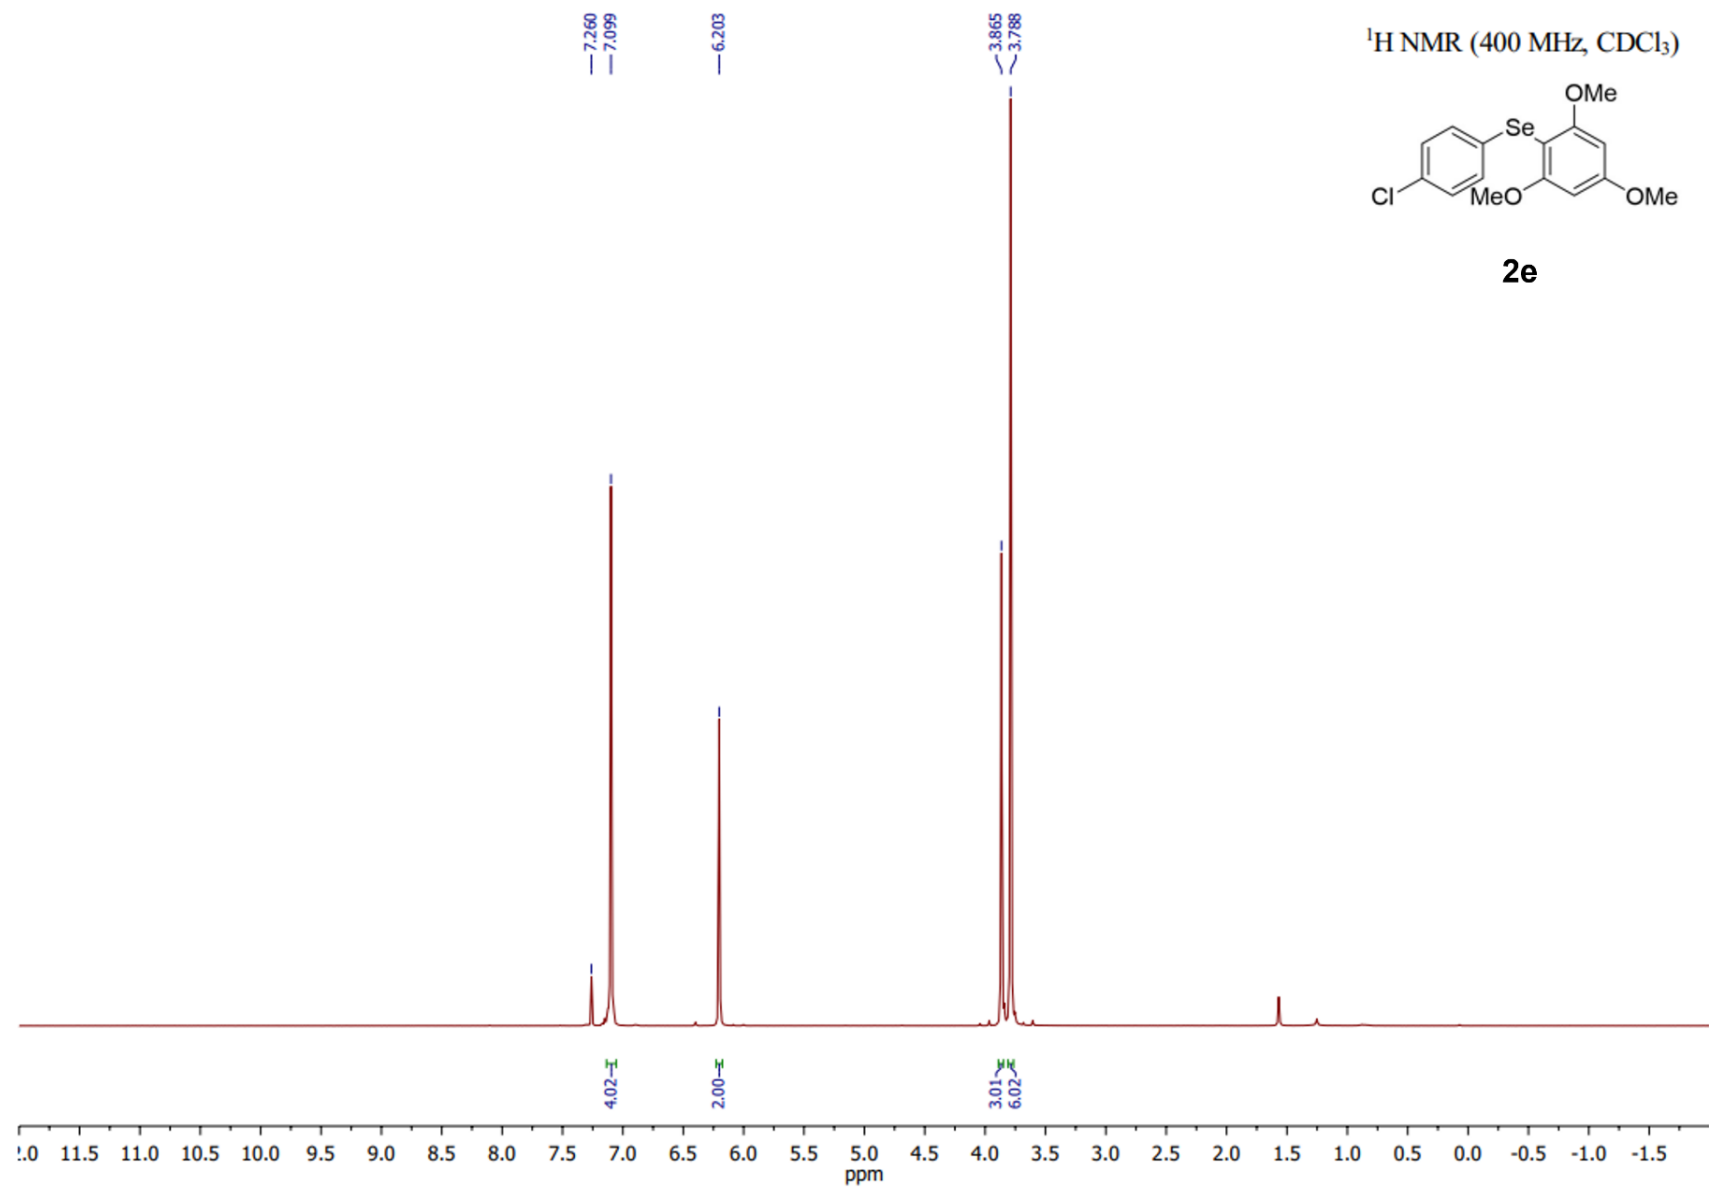



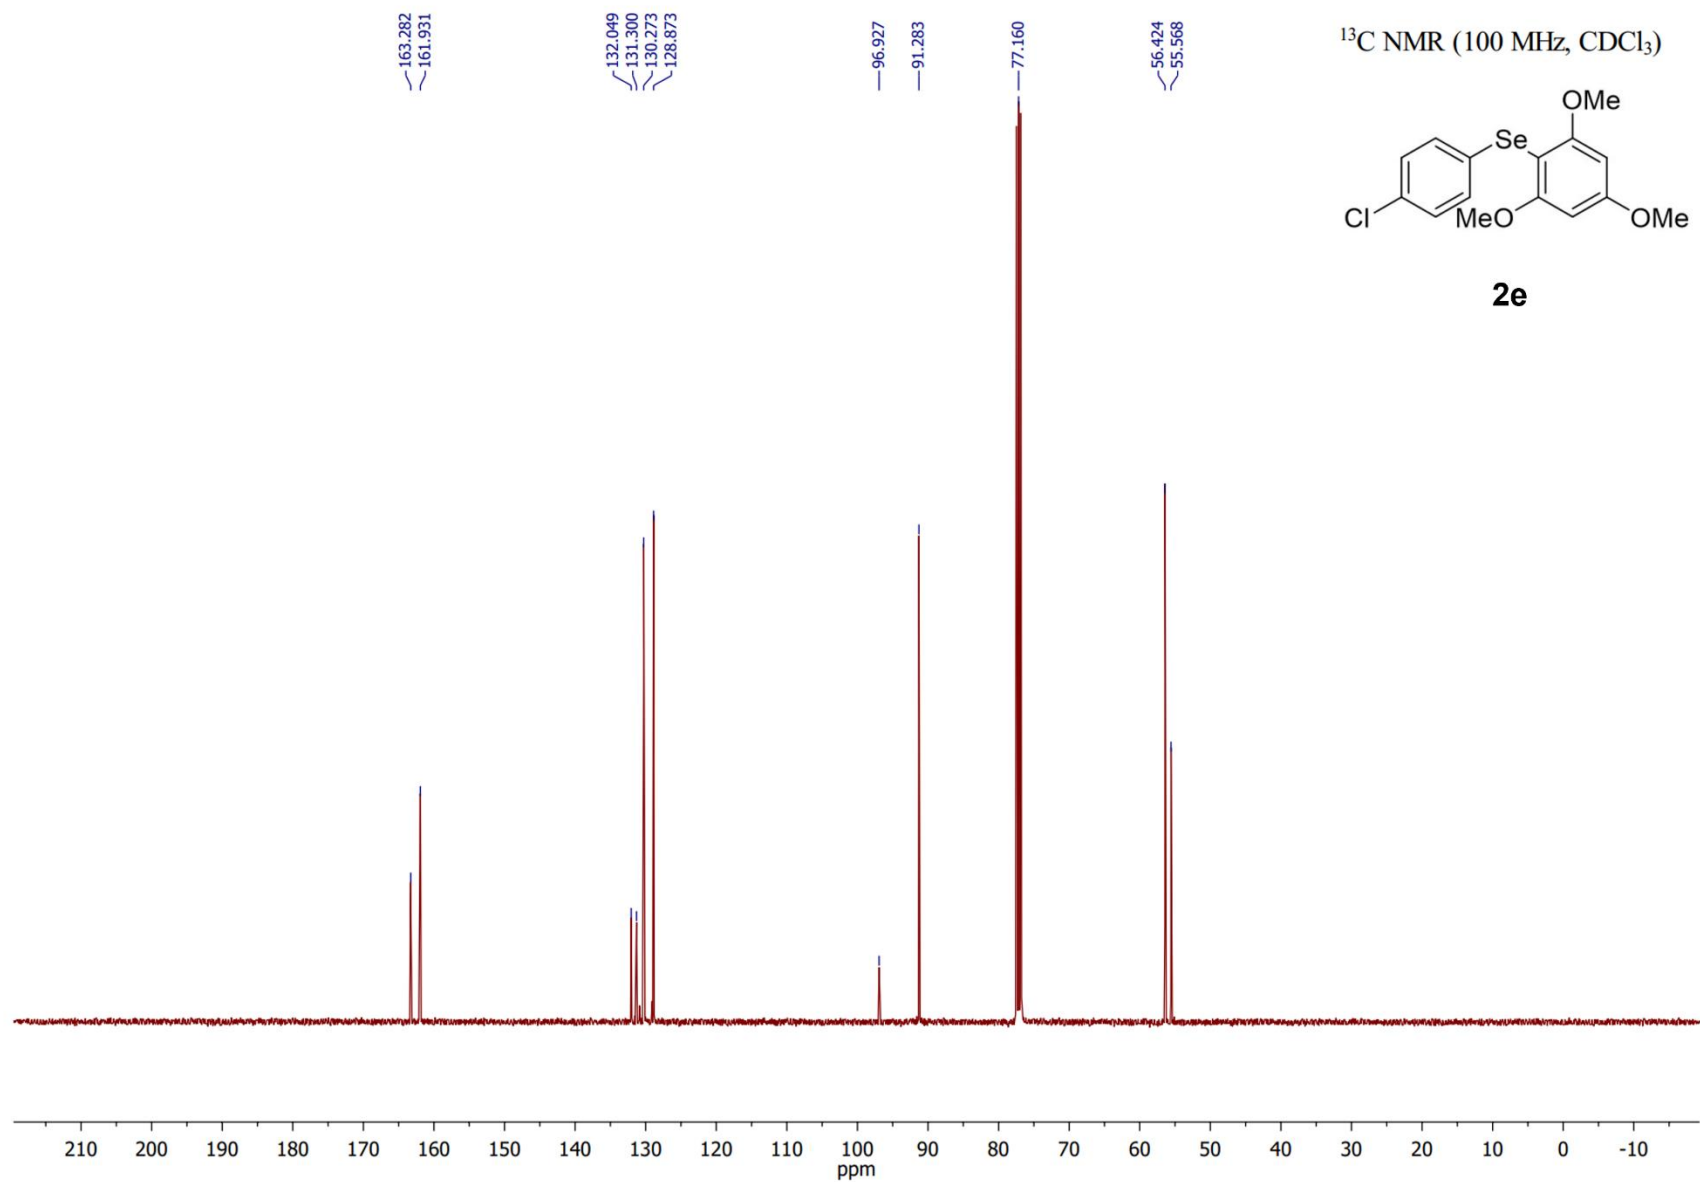

$^{77}\text{Se}$  NMR (76 MHz,  $\text{CDCl}_3$ )

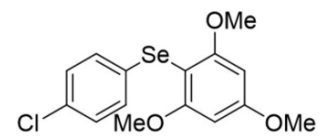

**2e**

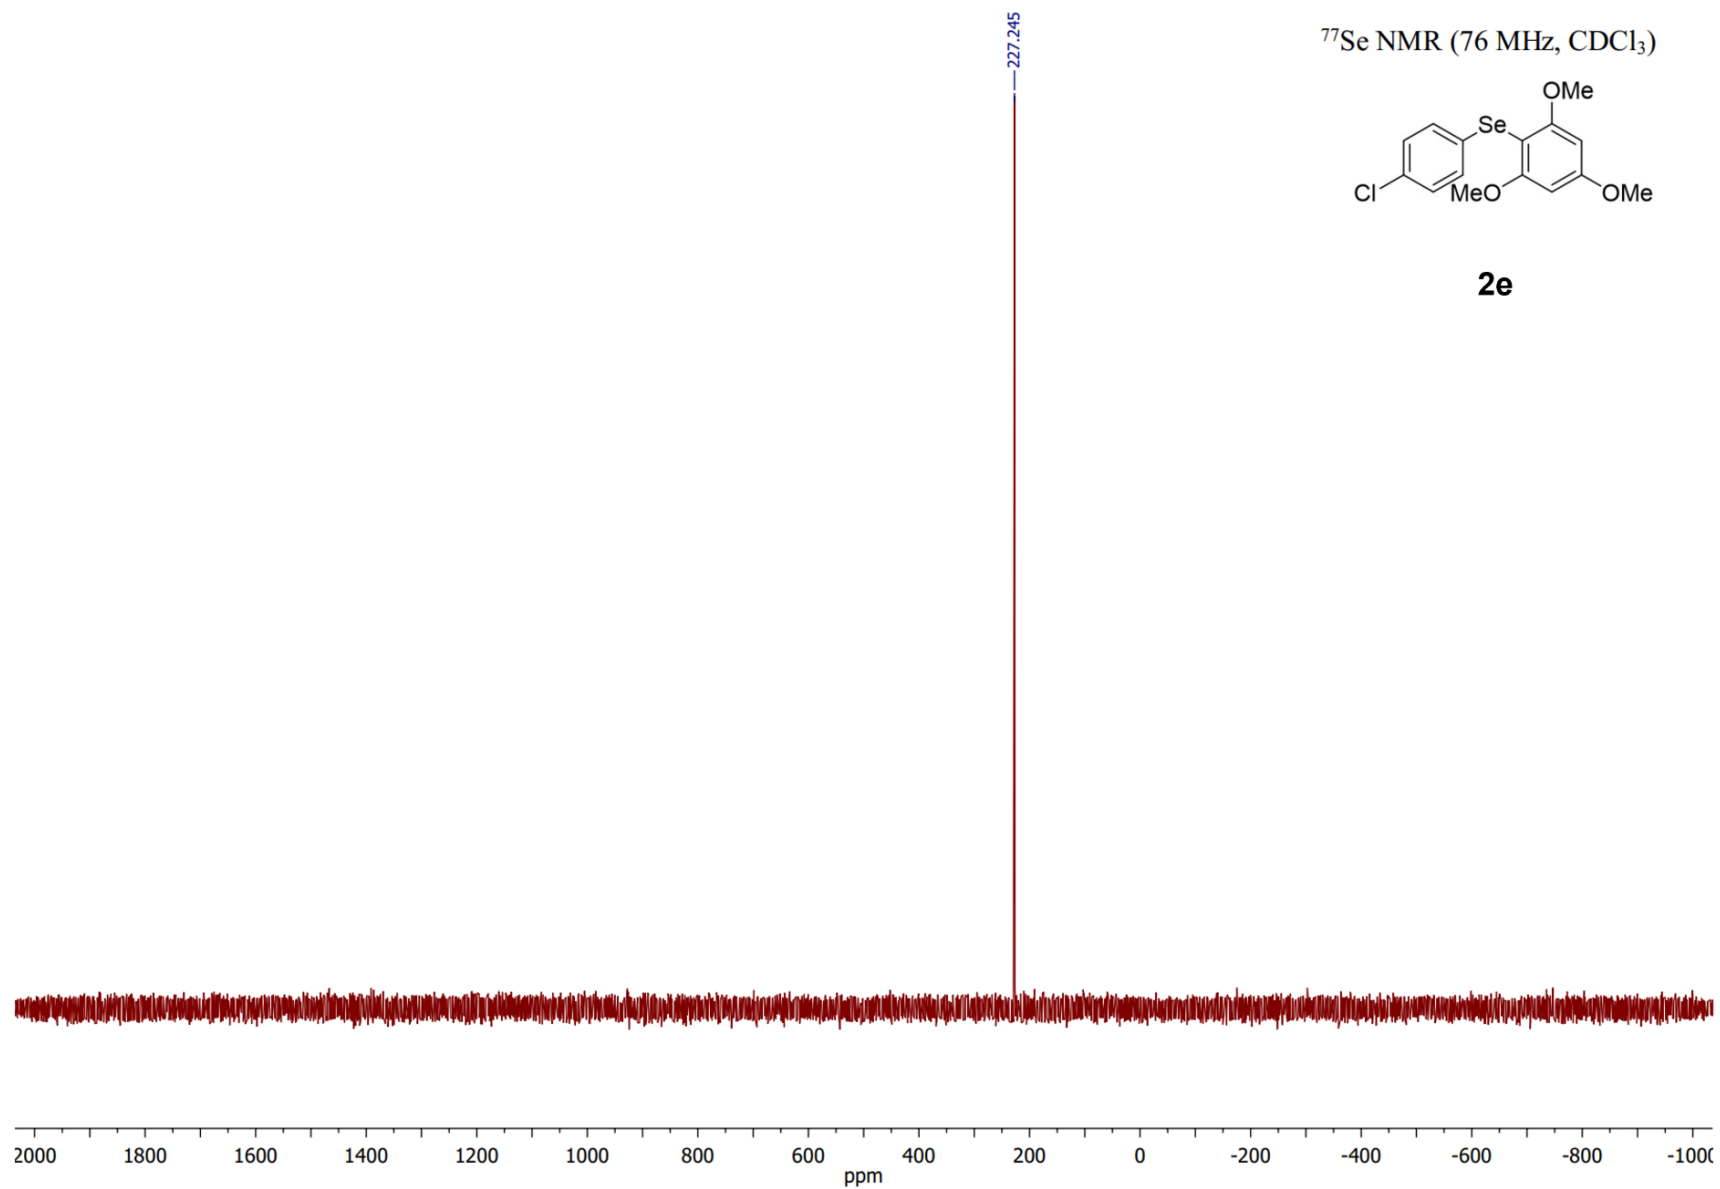

S50

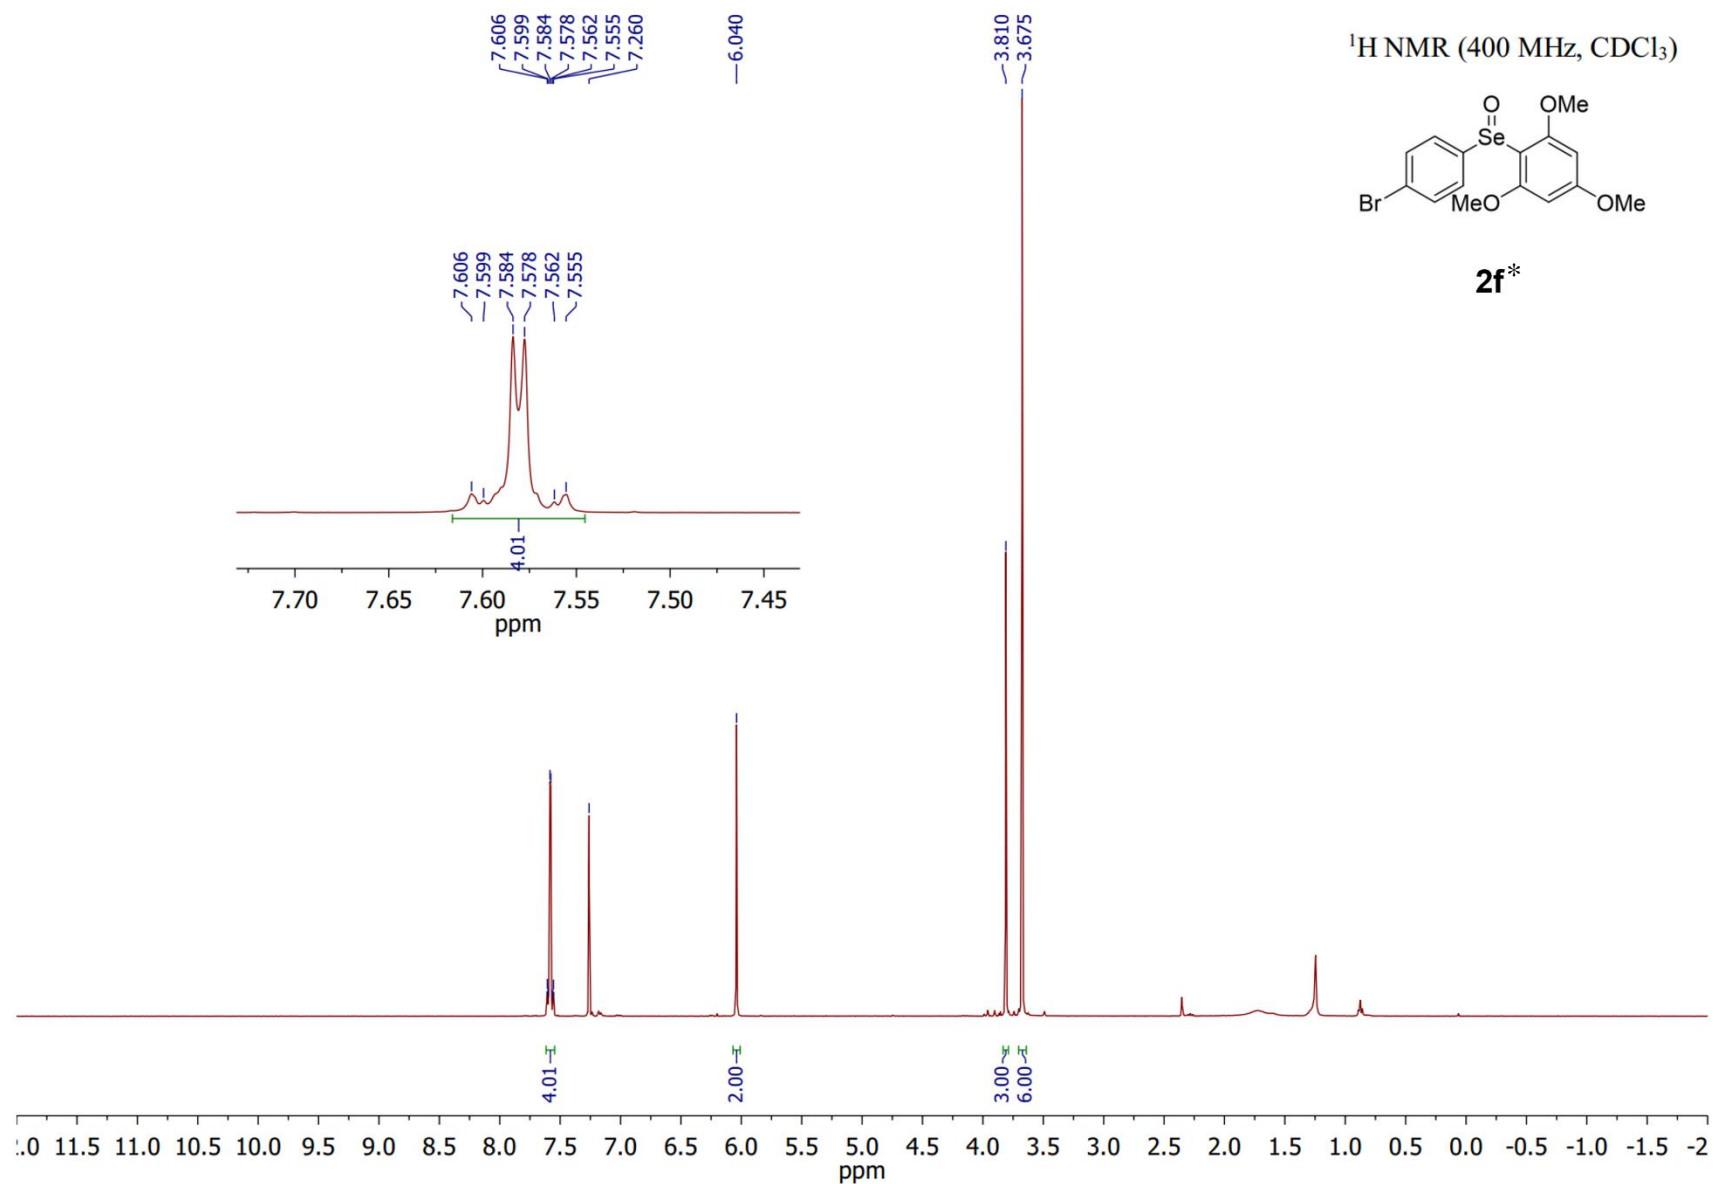

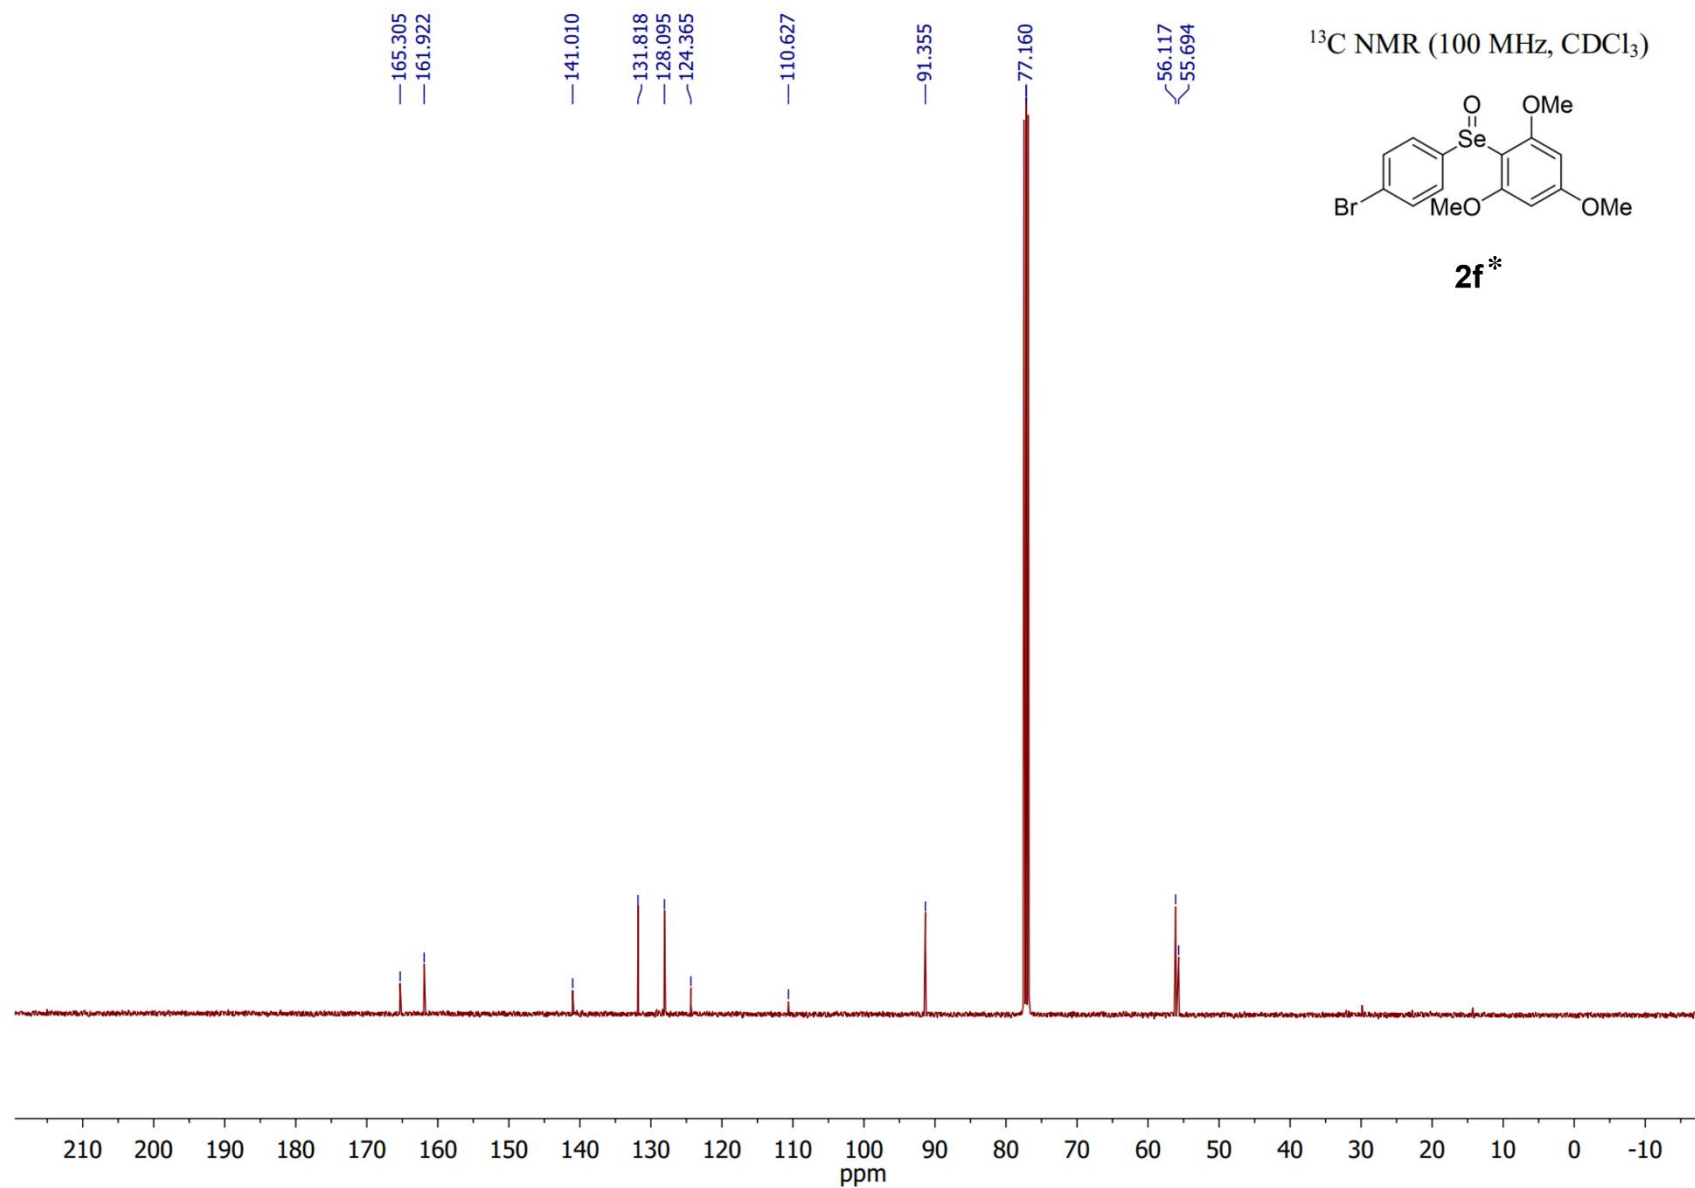

$^{77}\text{Se}$  NMR (76 MHz,  $\text{CDCl}_3$ )

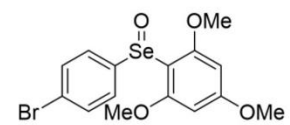

**2f\***

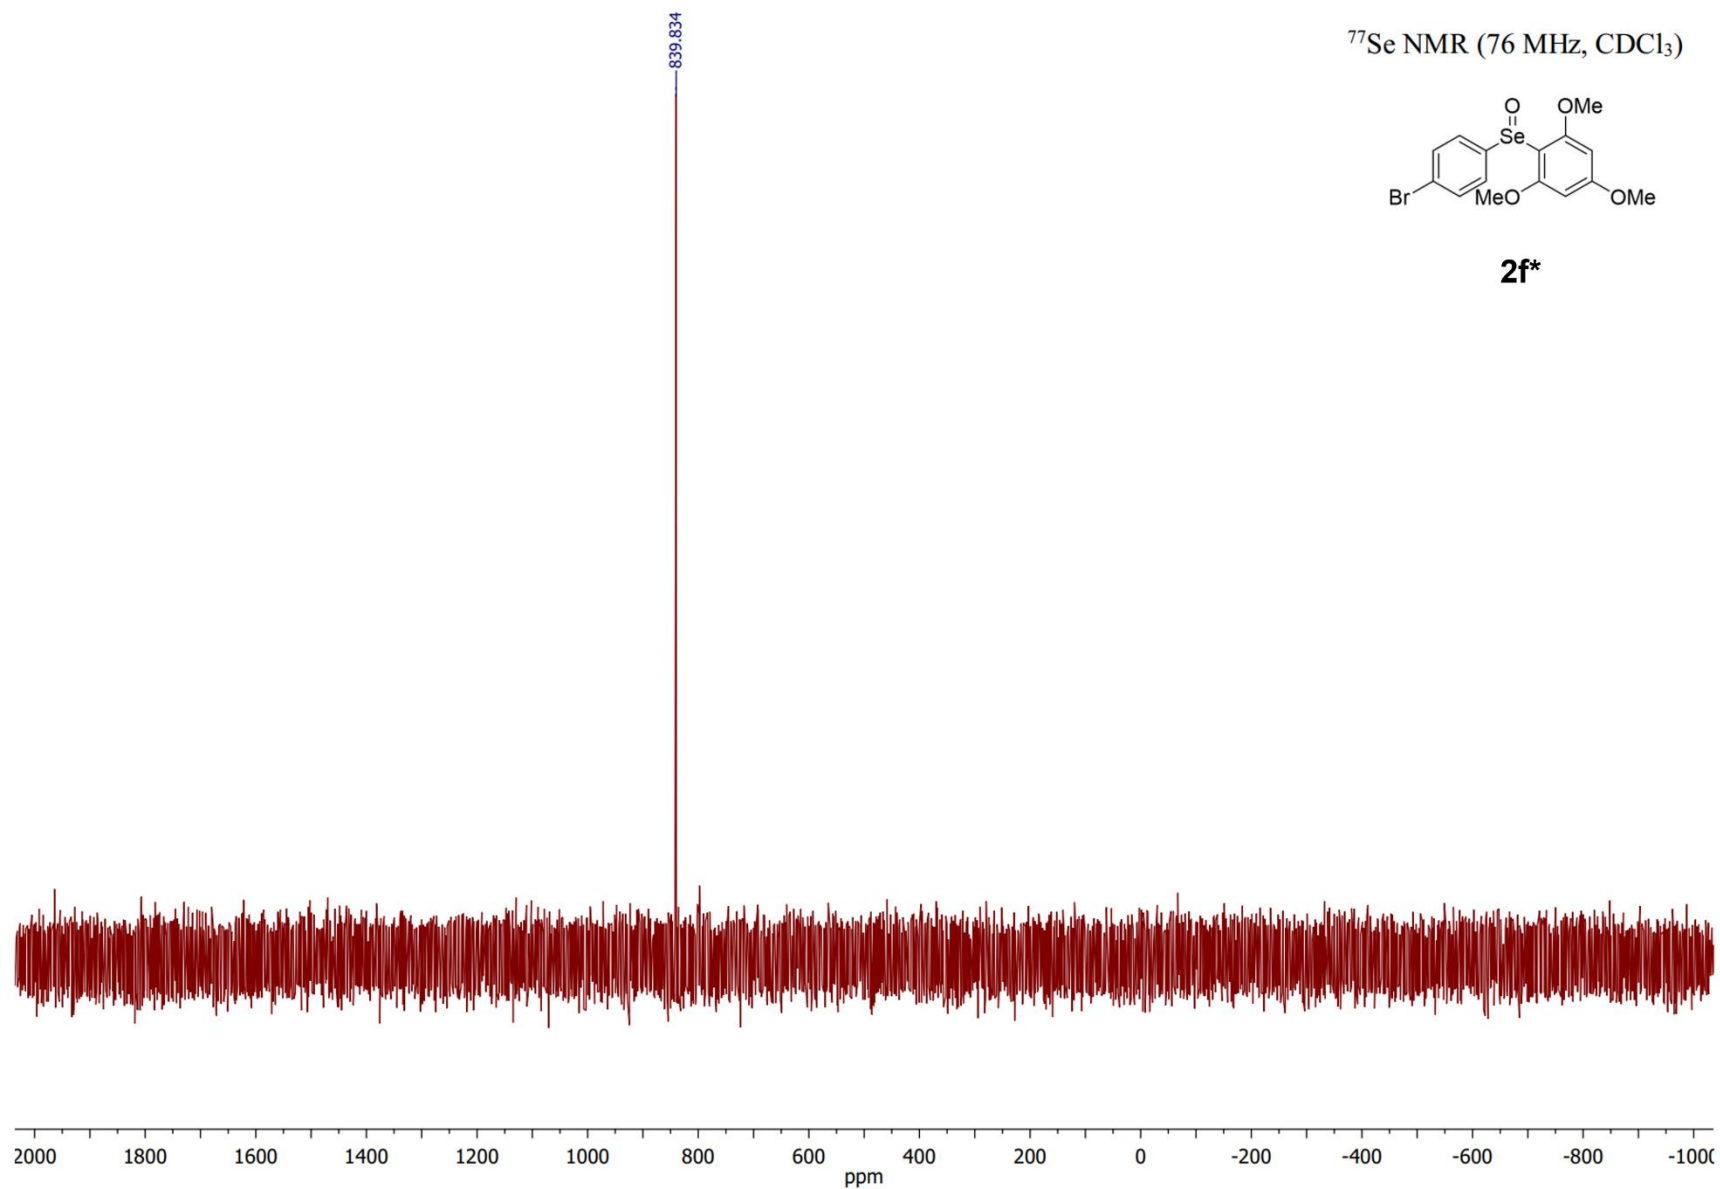

S53

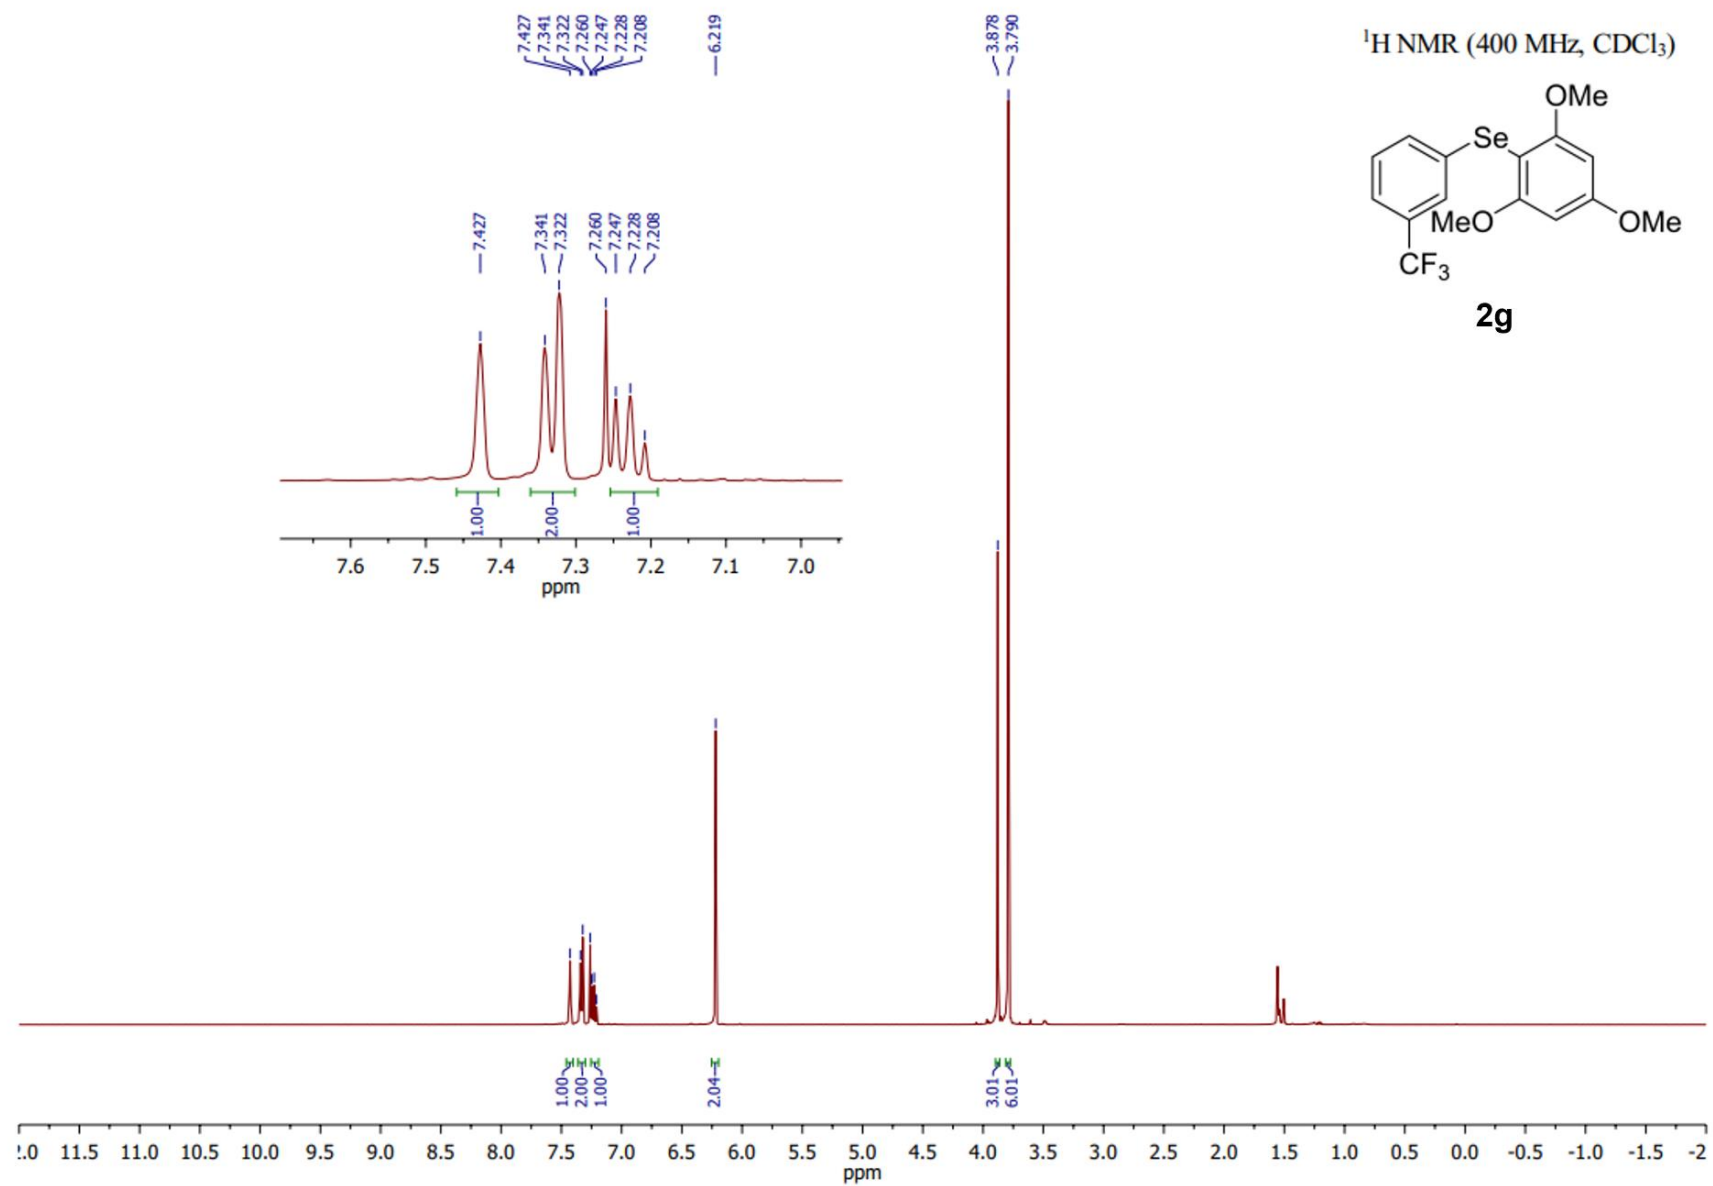

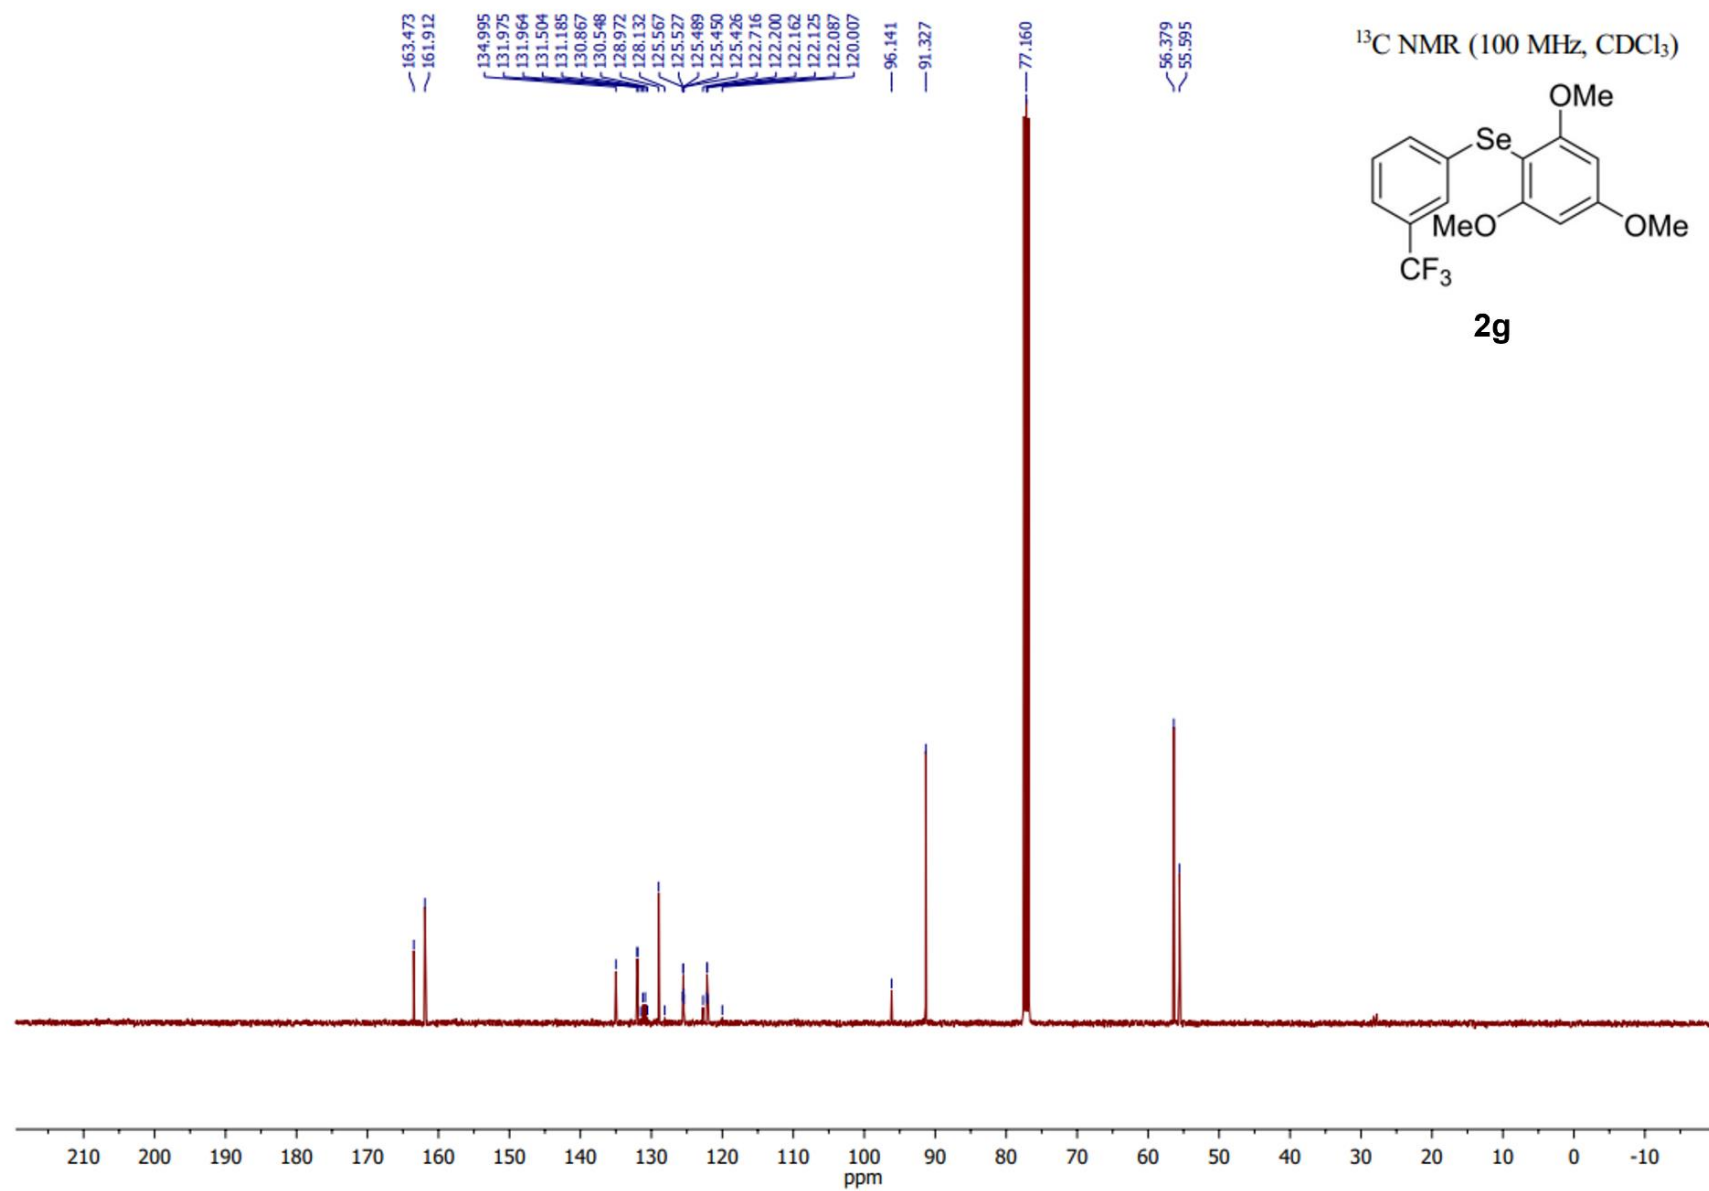

<sup>19</sup>F NMR (376 MHz, CDCl<sub>3</sub>)

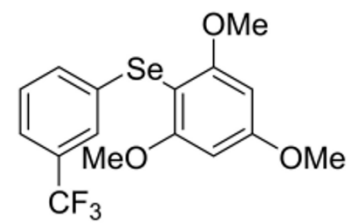

**2g**

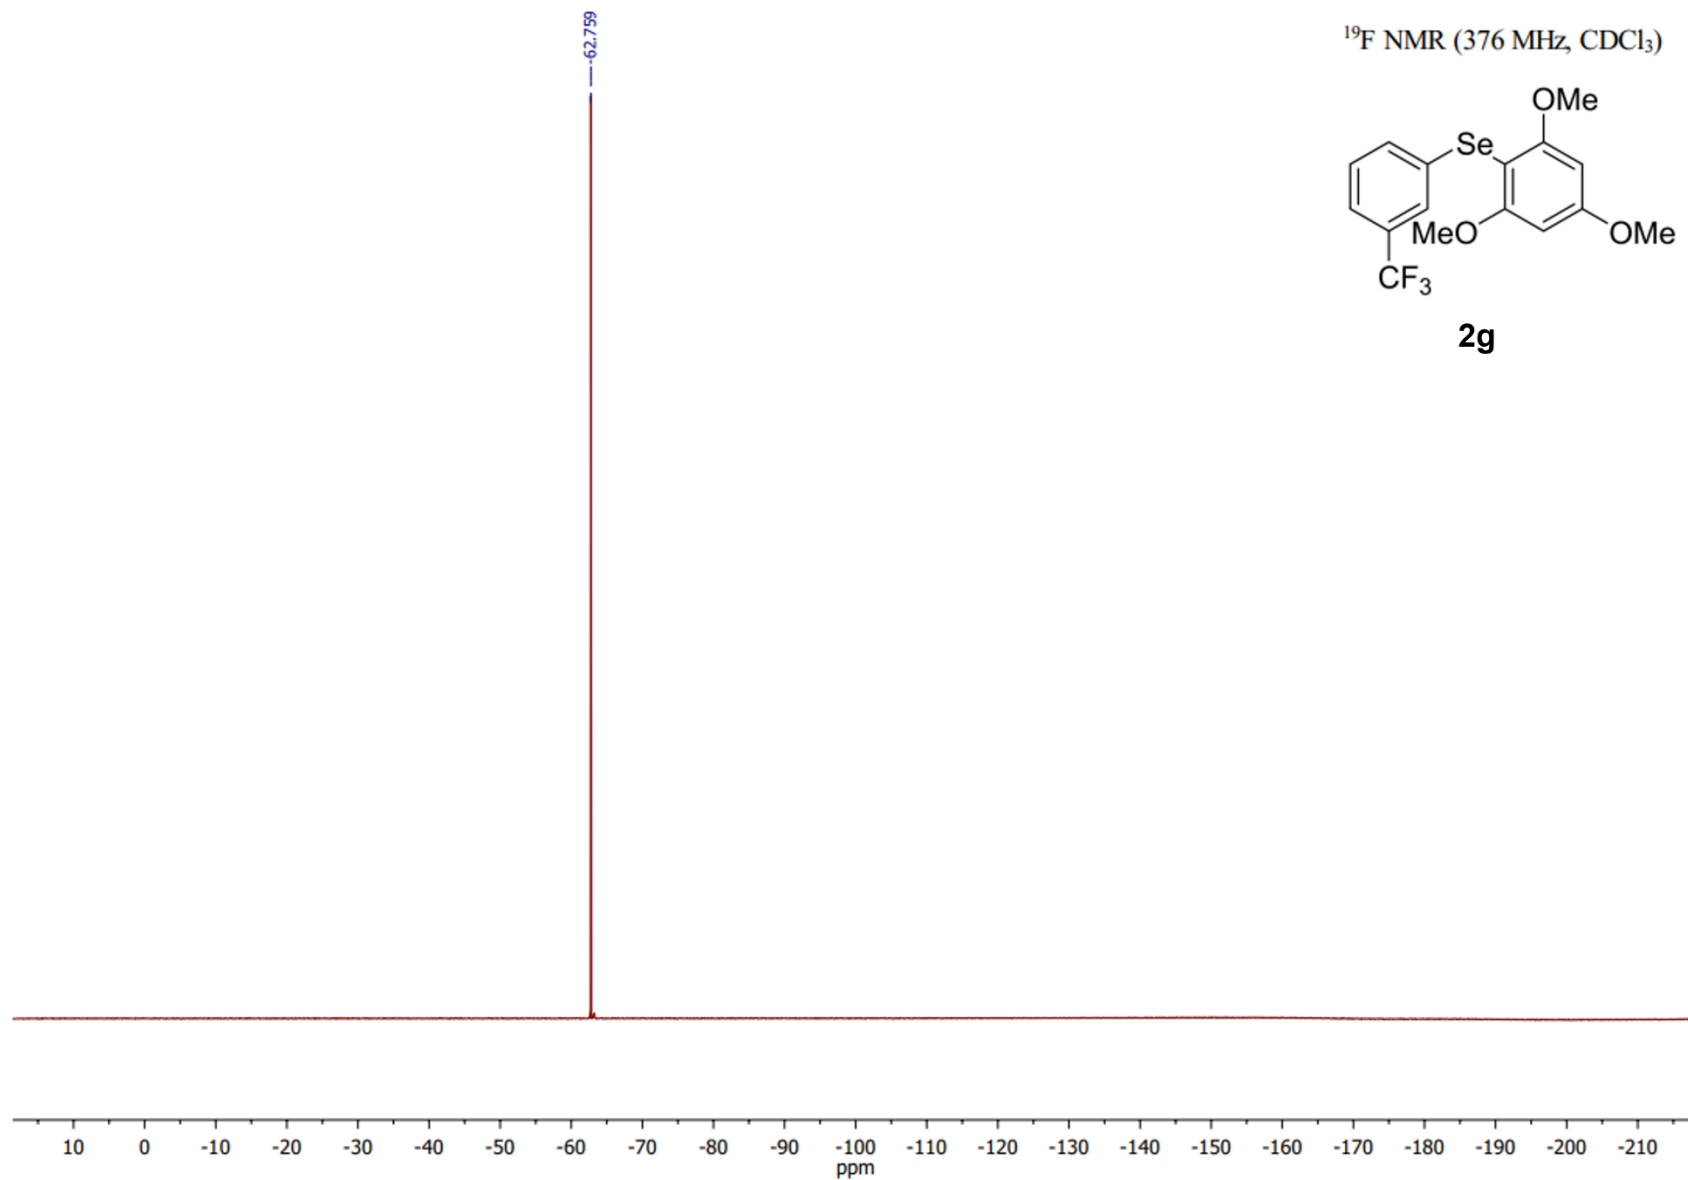



$^{77}\text{Se}$  NMR (76 MHz,  $\text{CDCl}_3$ )

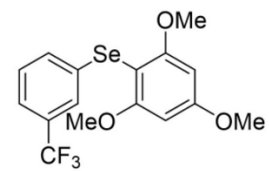

**2g**

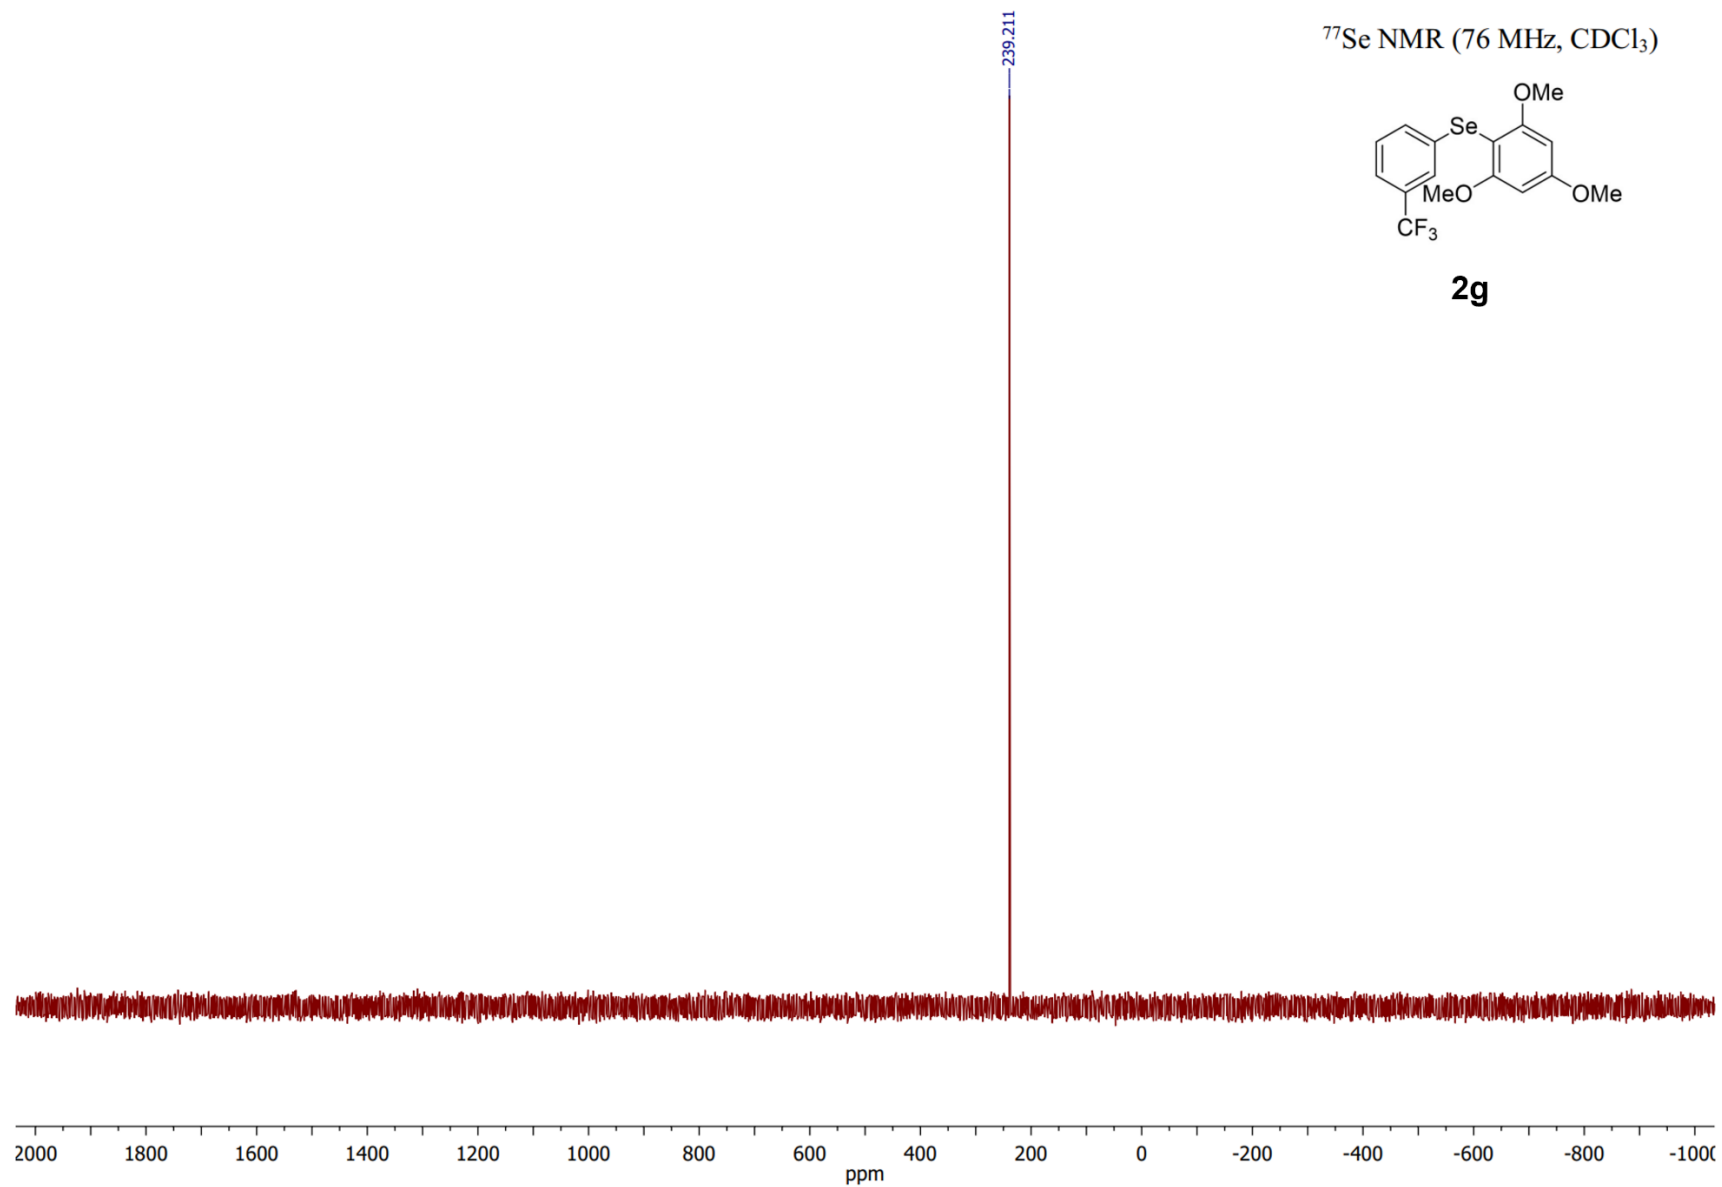

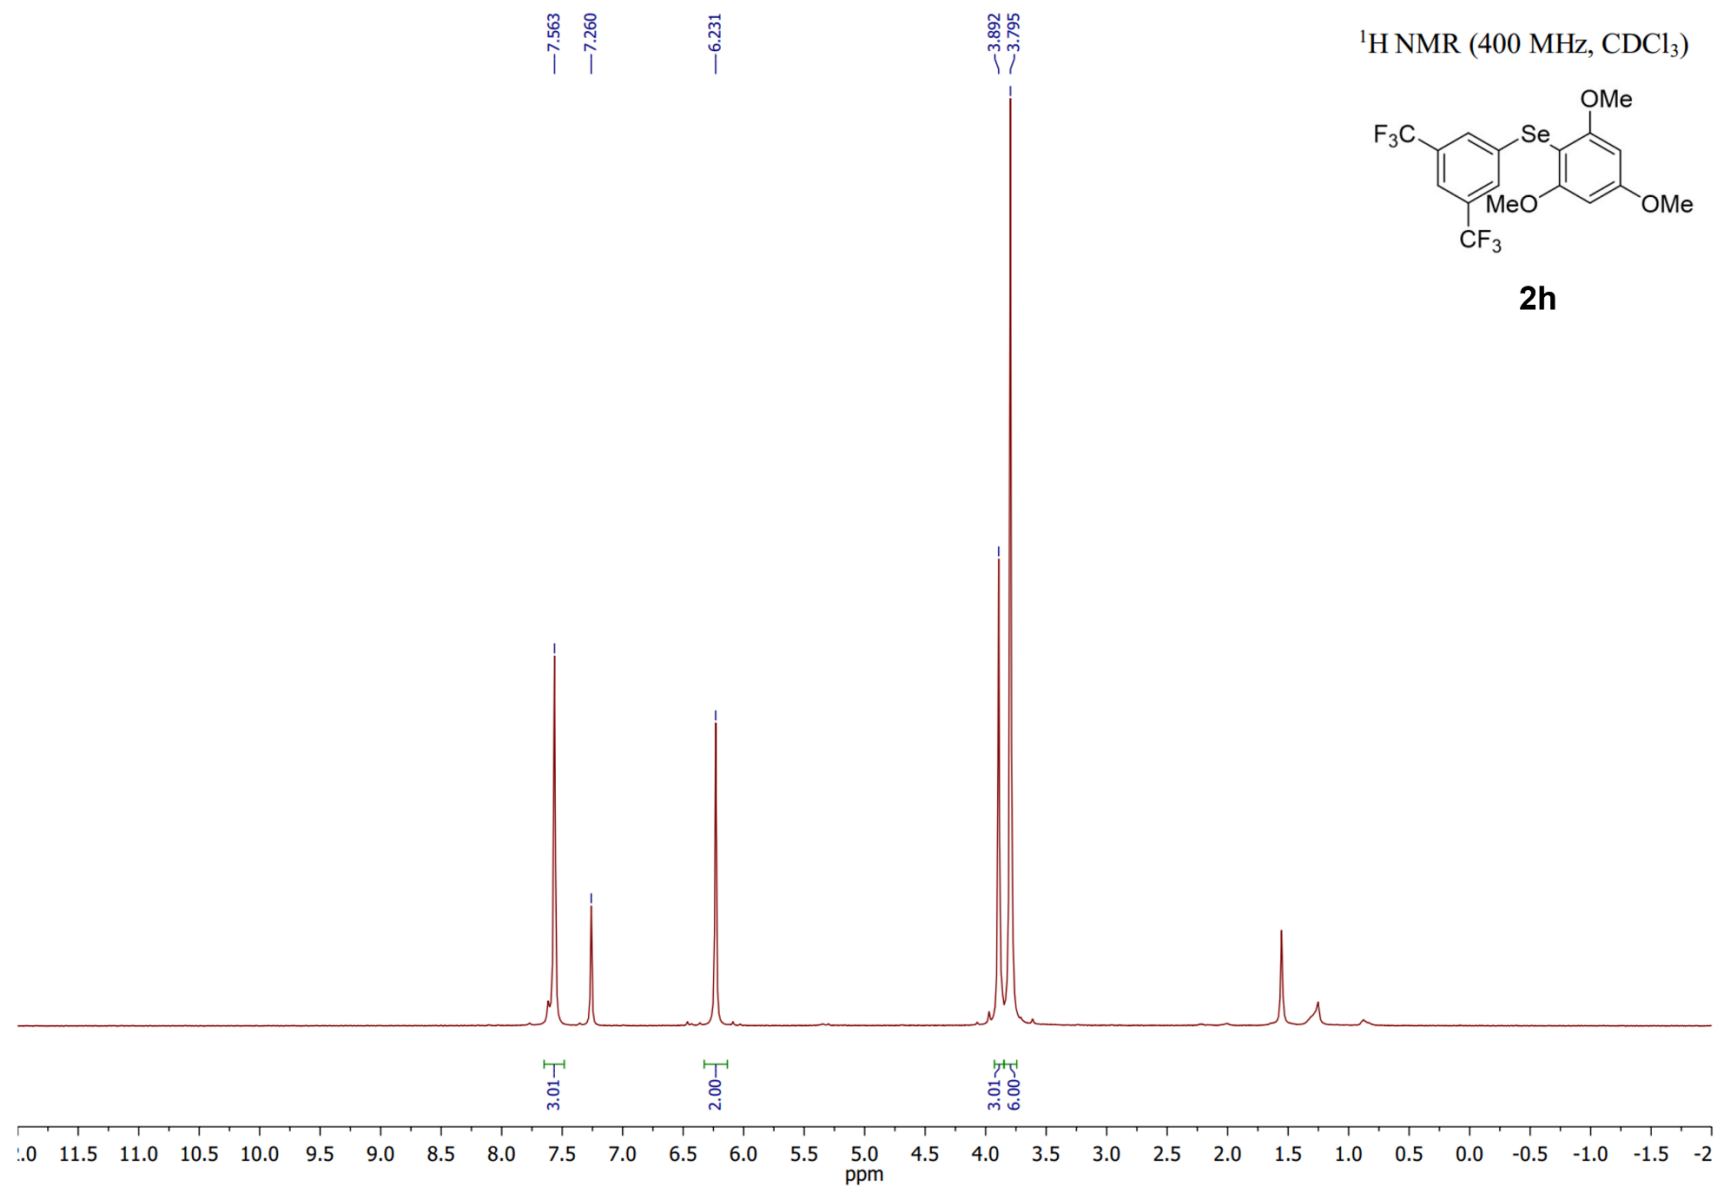

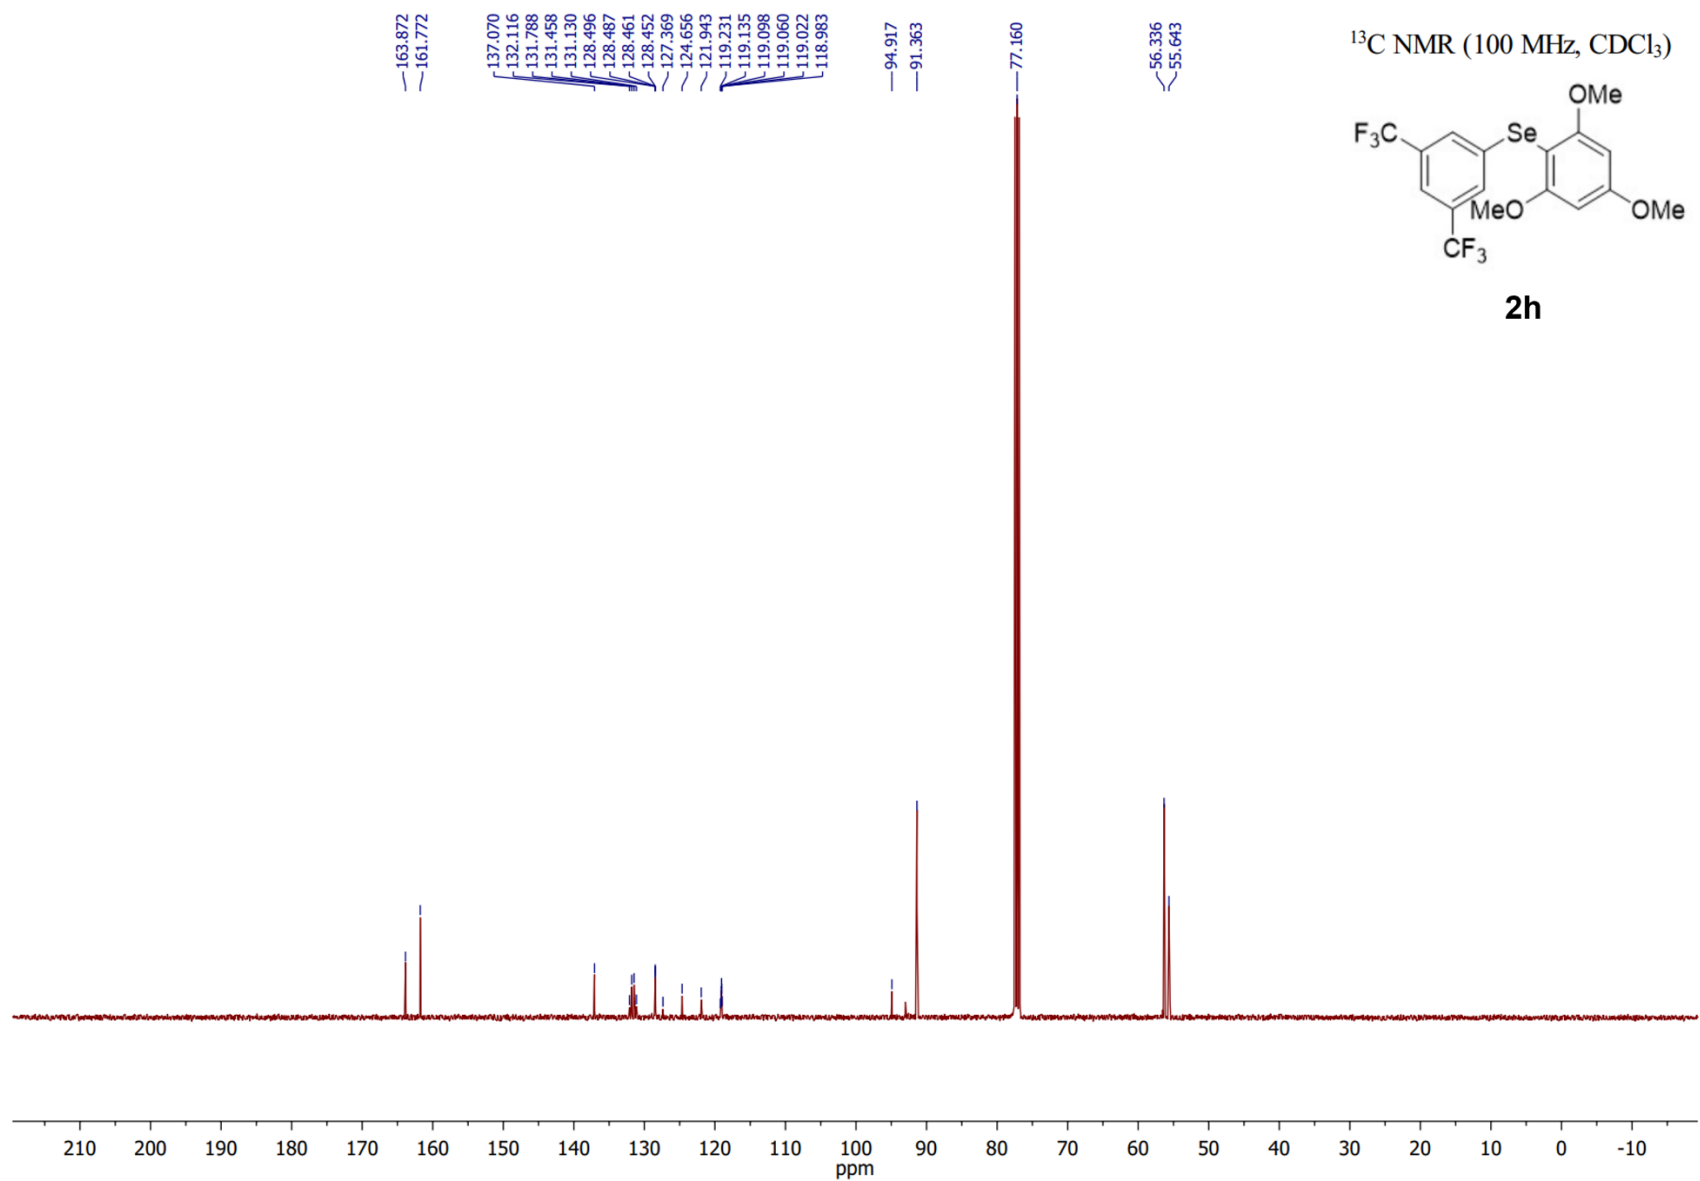

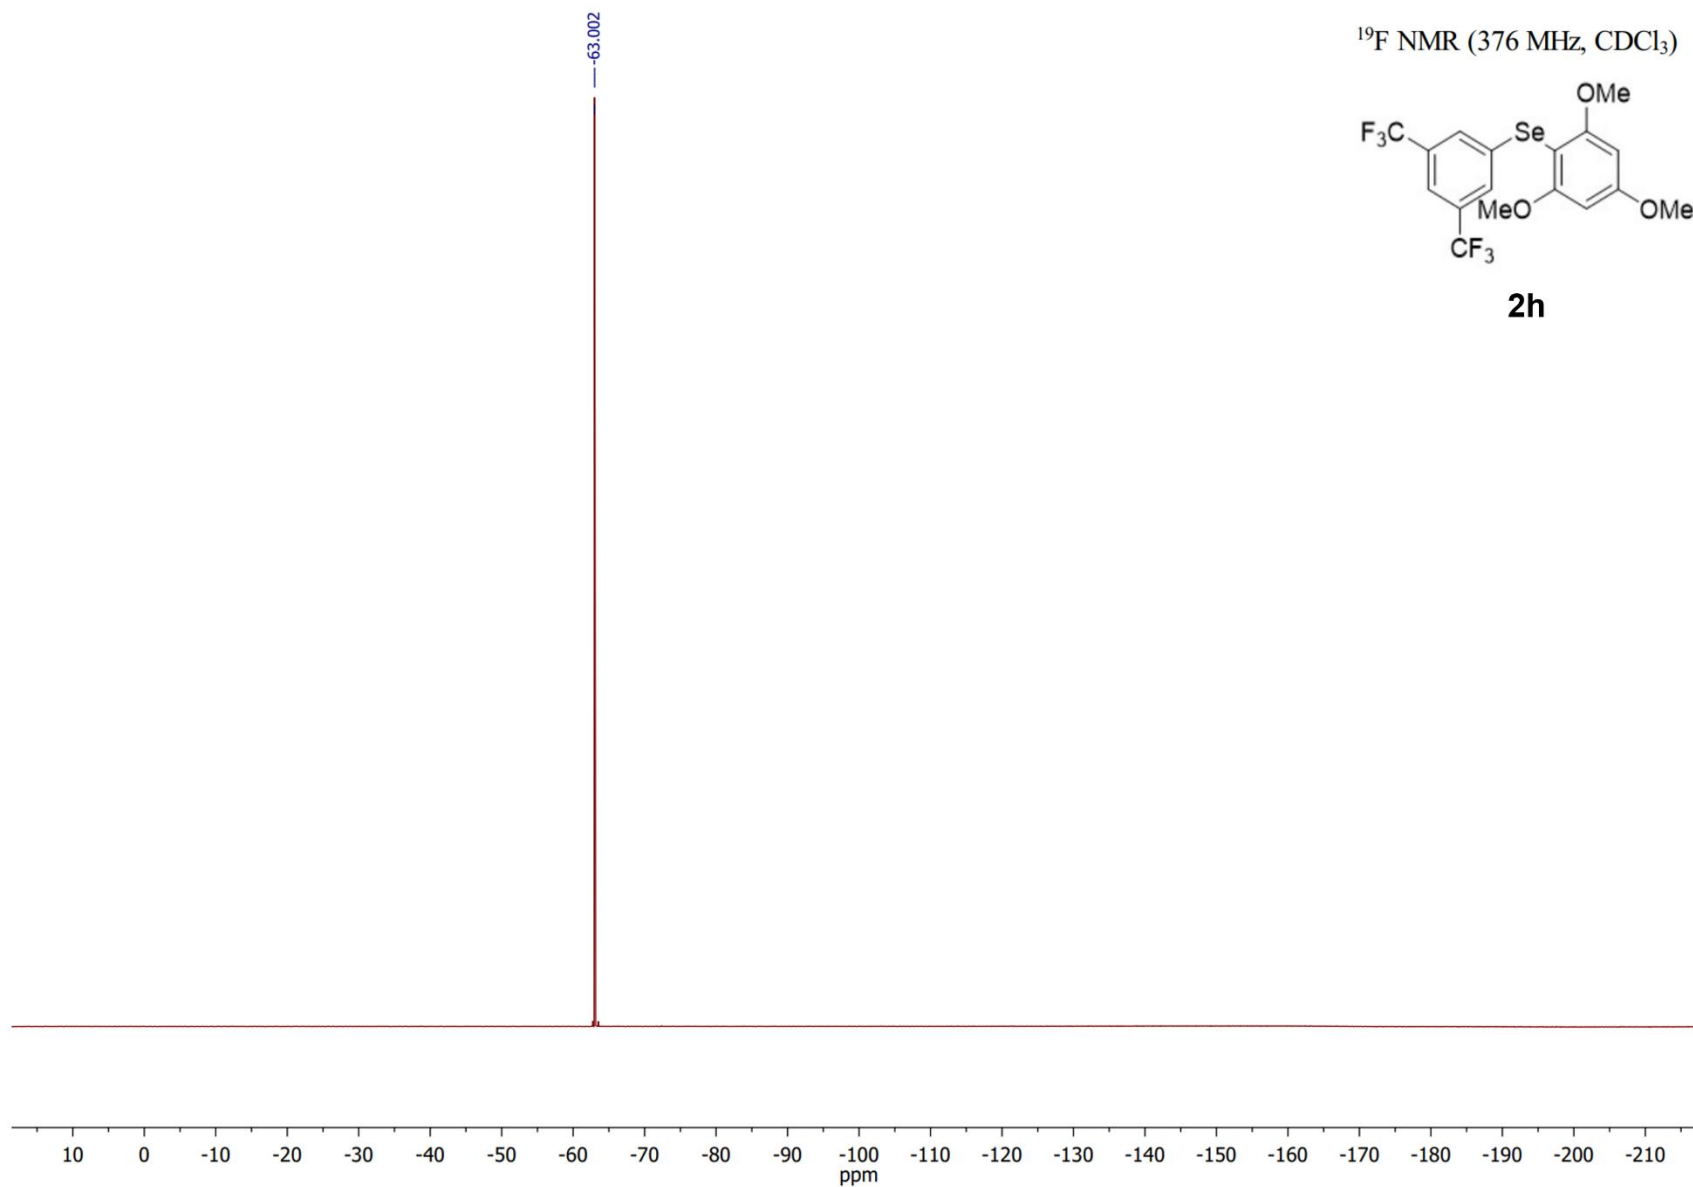

<sup>77</sup>Se NMR (76 MHz, CDCl<sub>3</sub>)

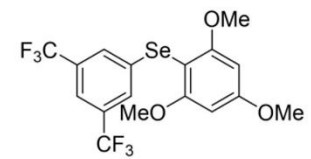

**2h**

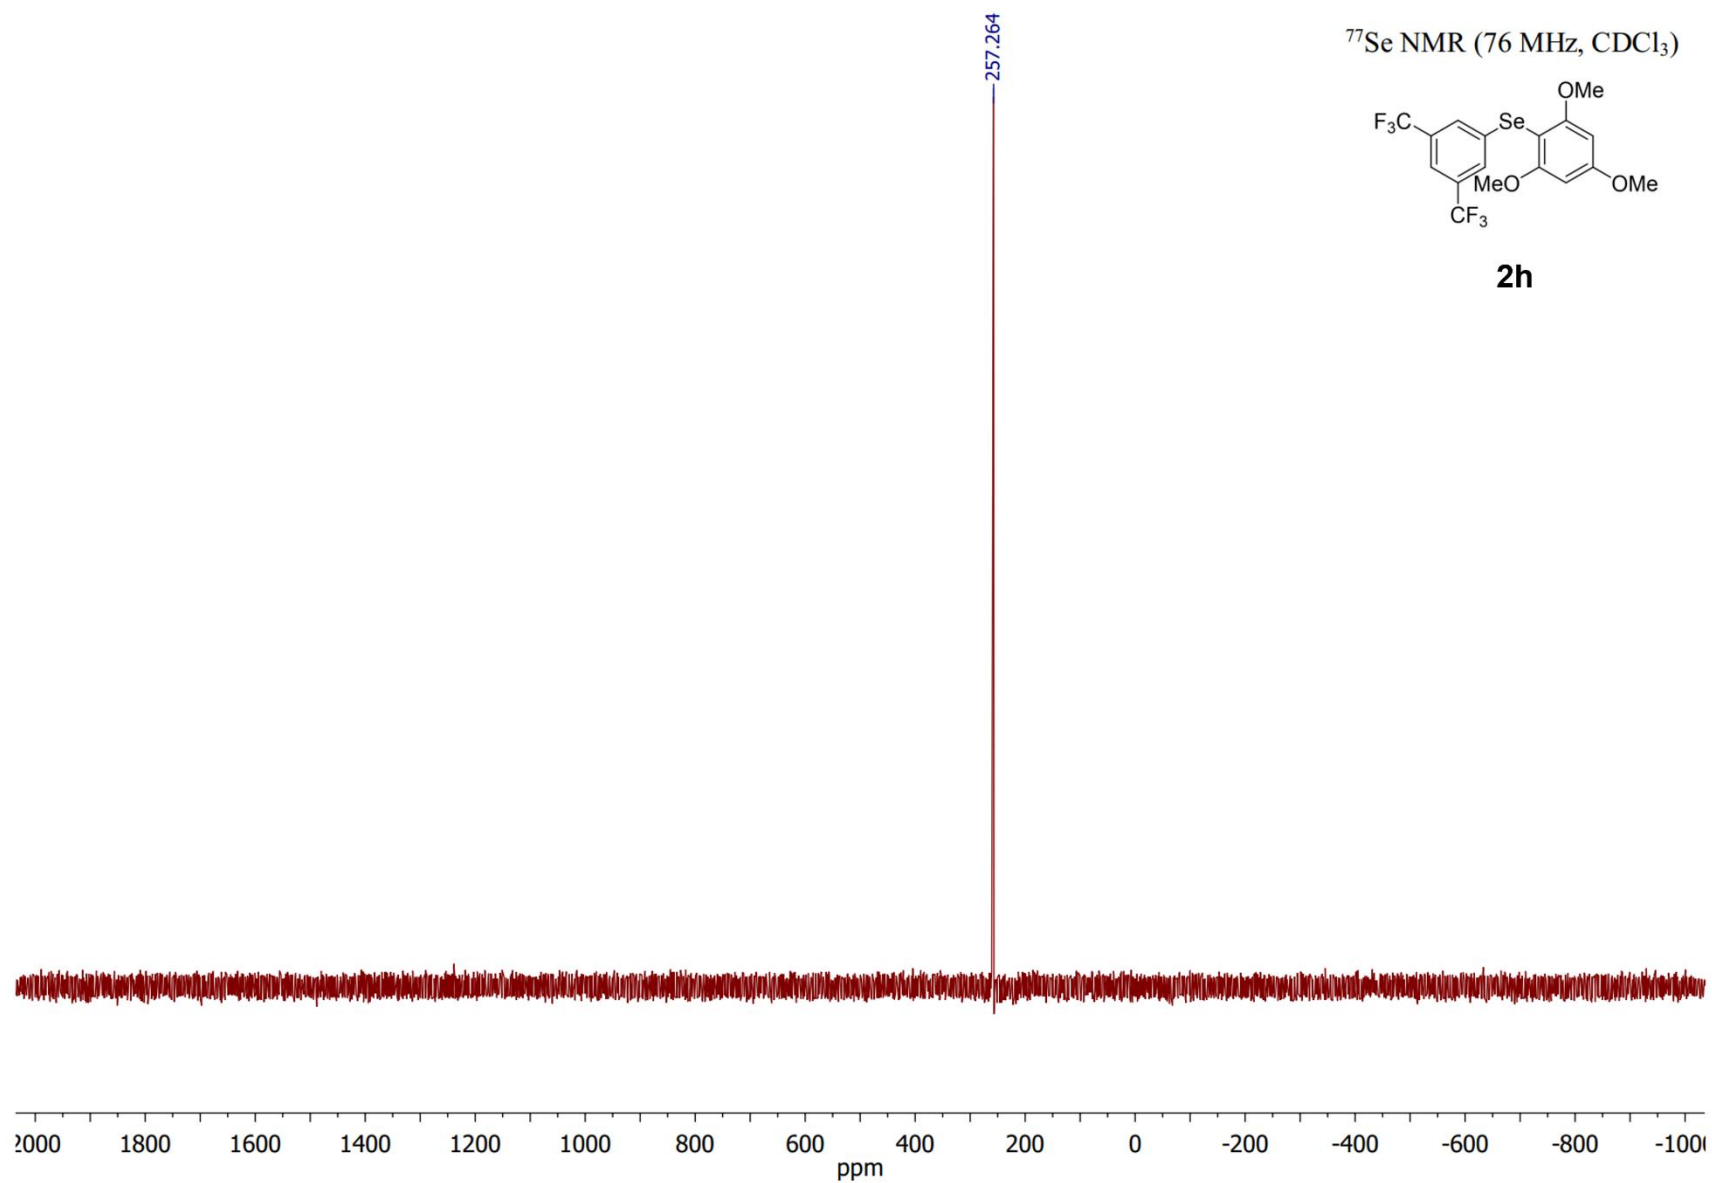

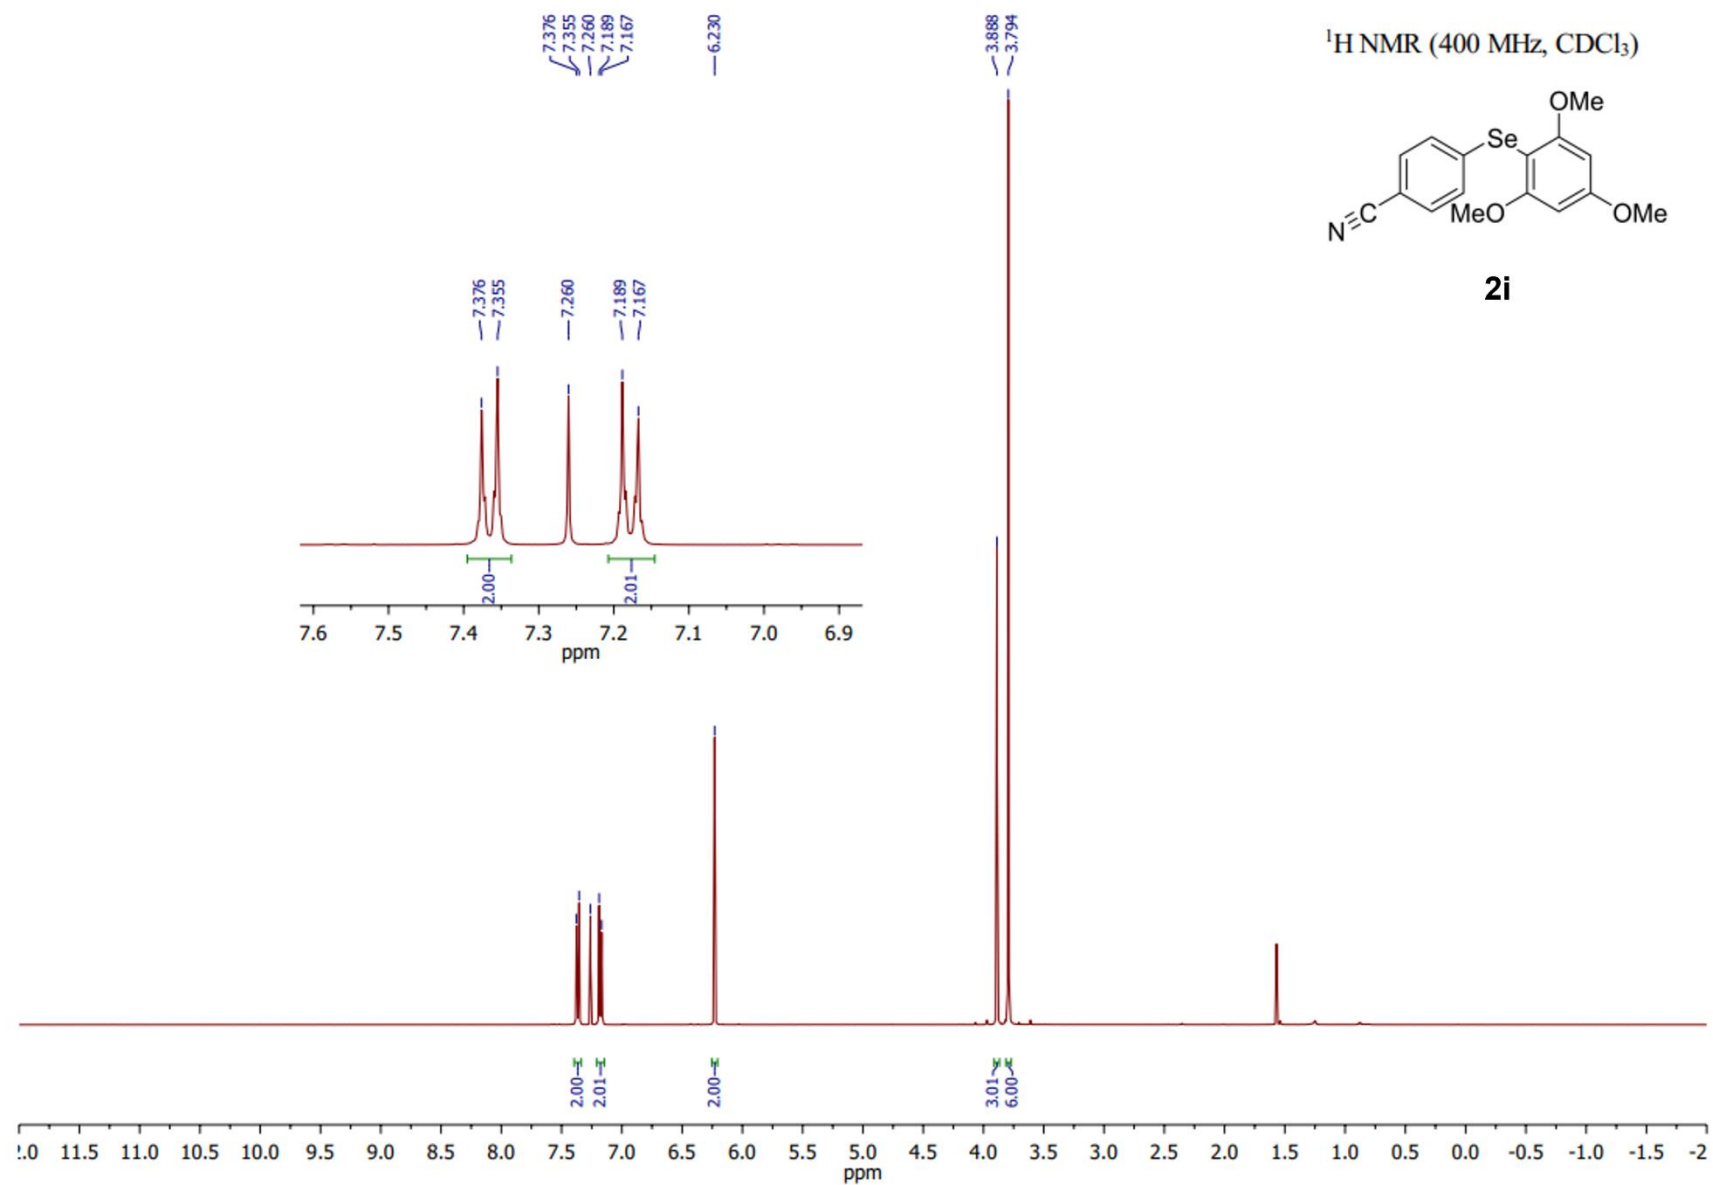

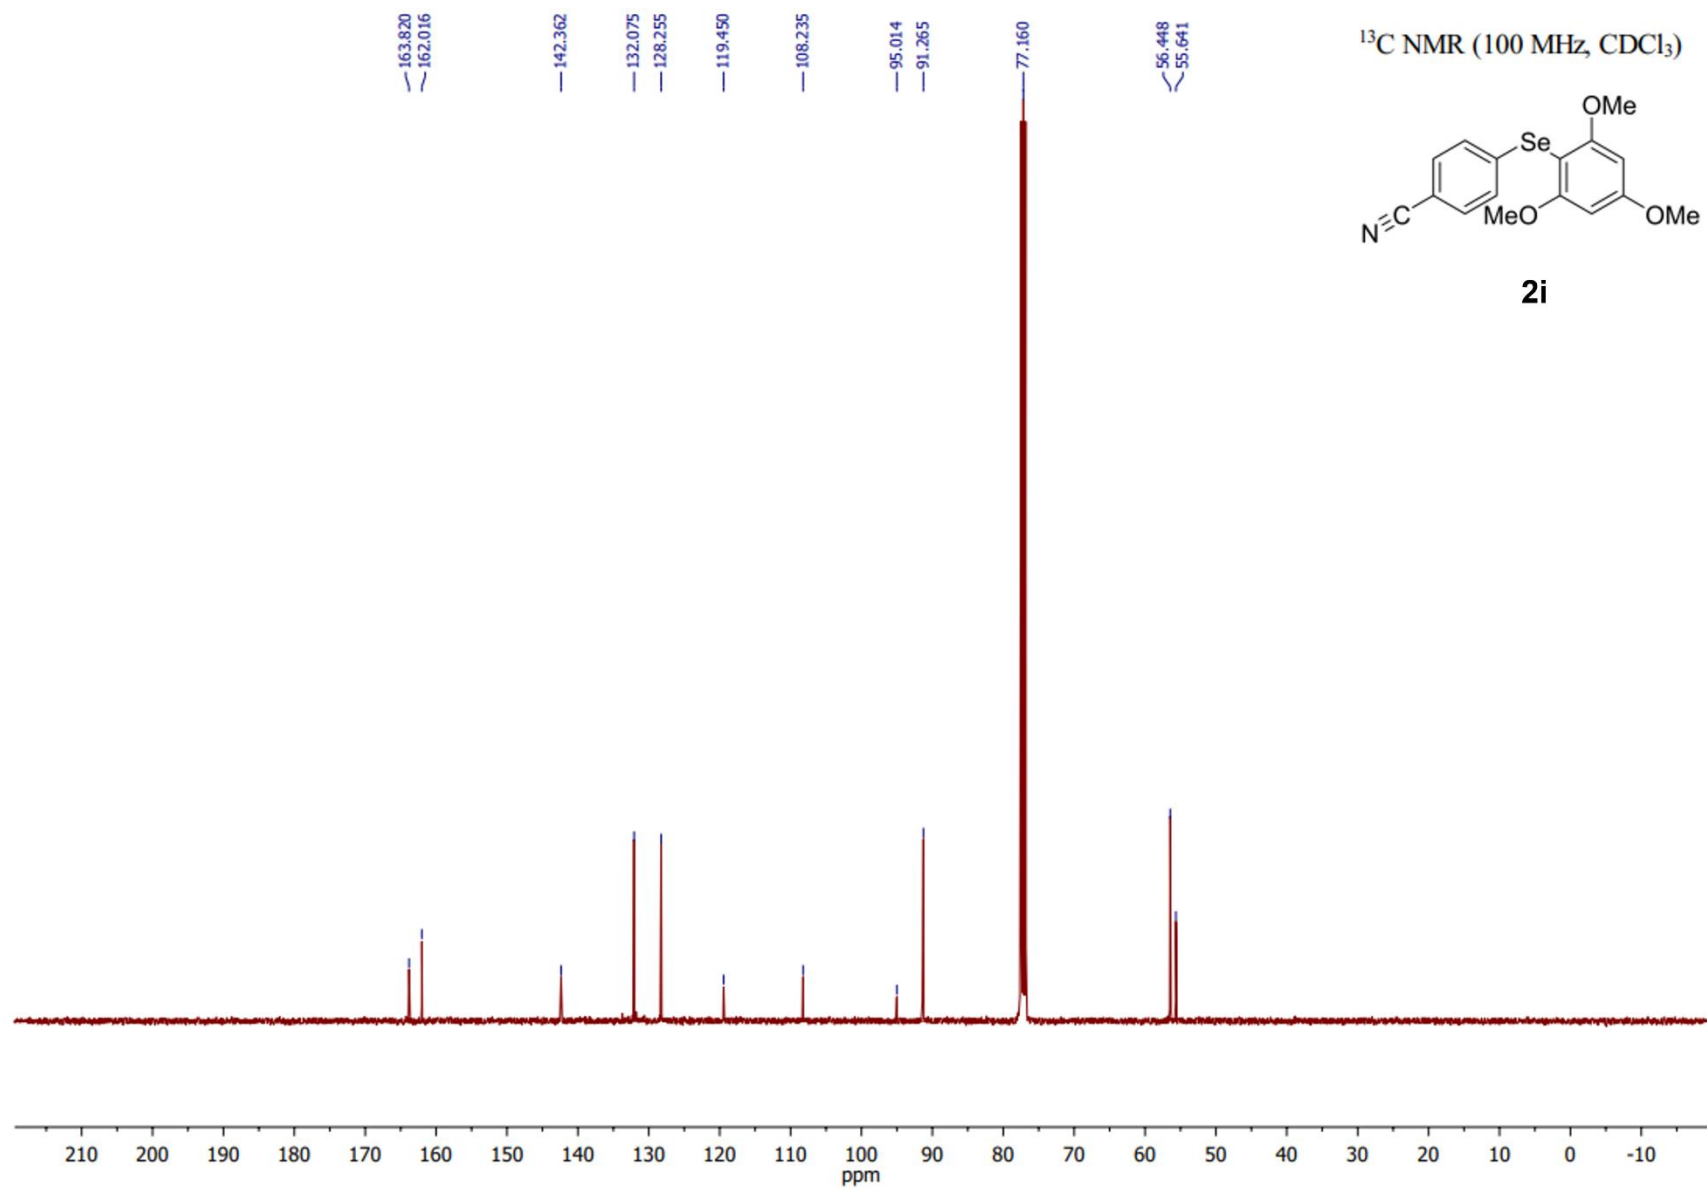

$^{77}\text{Se}$  NMR (76 MHz,  $\text{CDCl}_3$ )

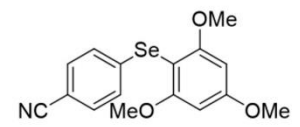

**2i**

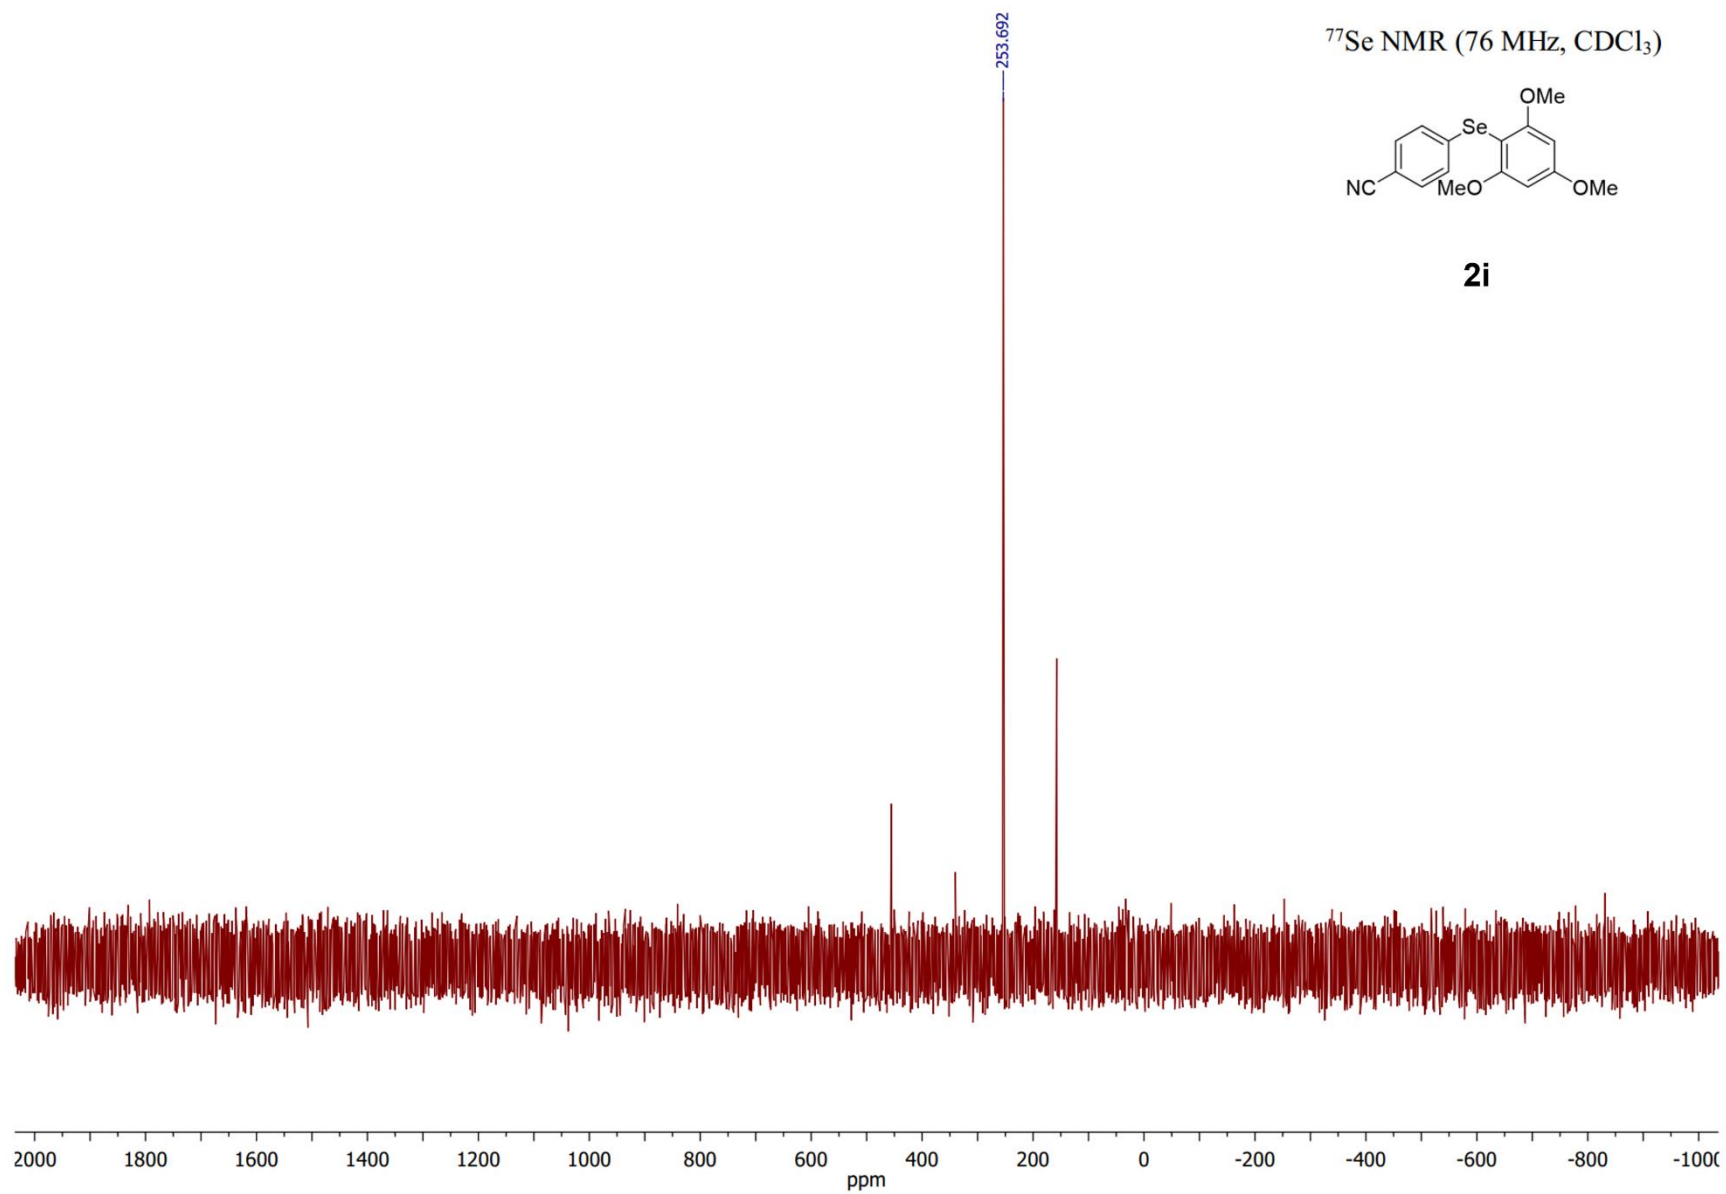

S64



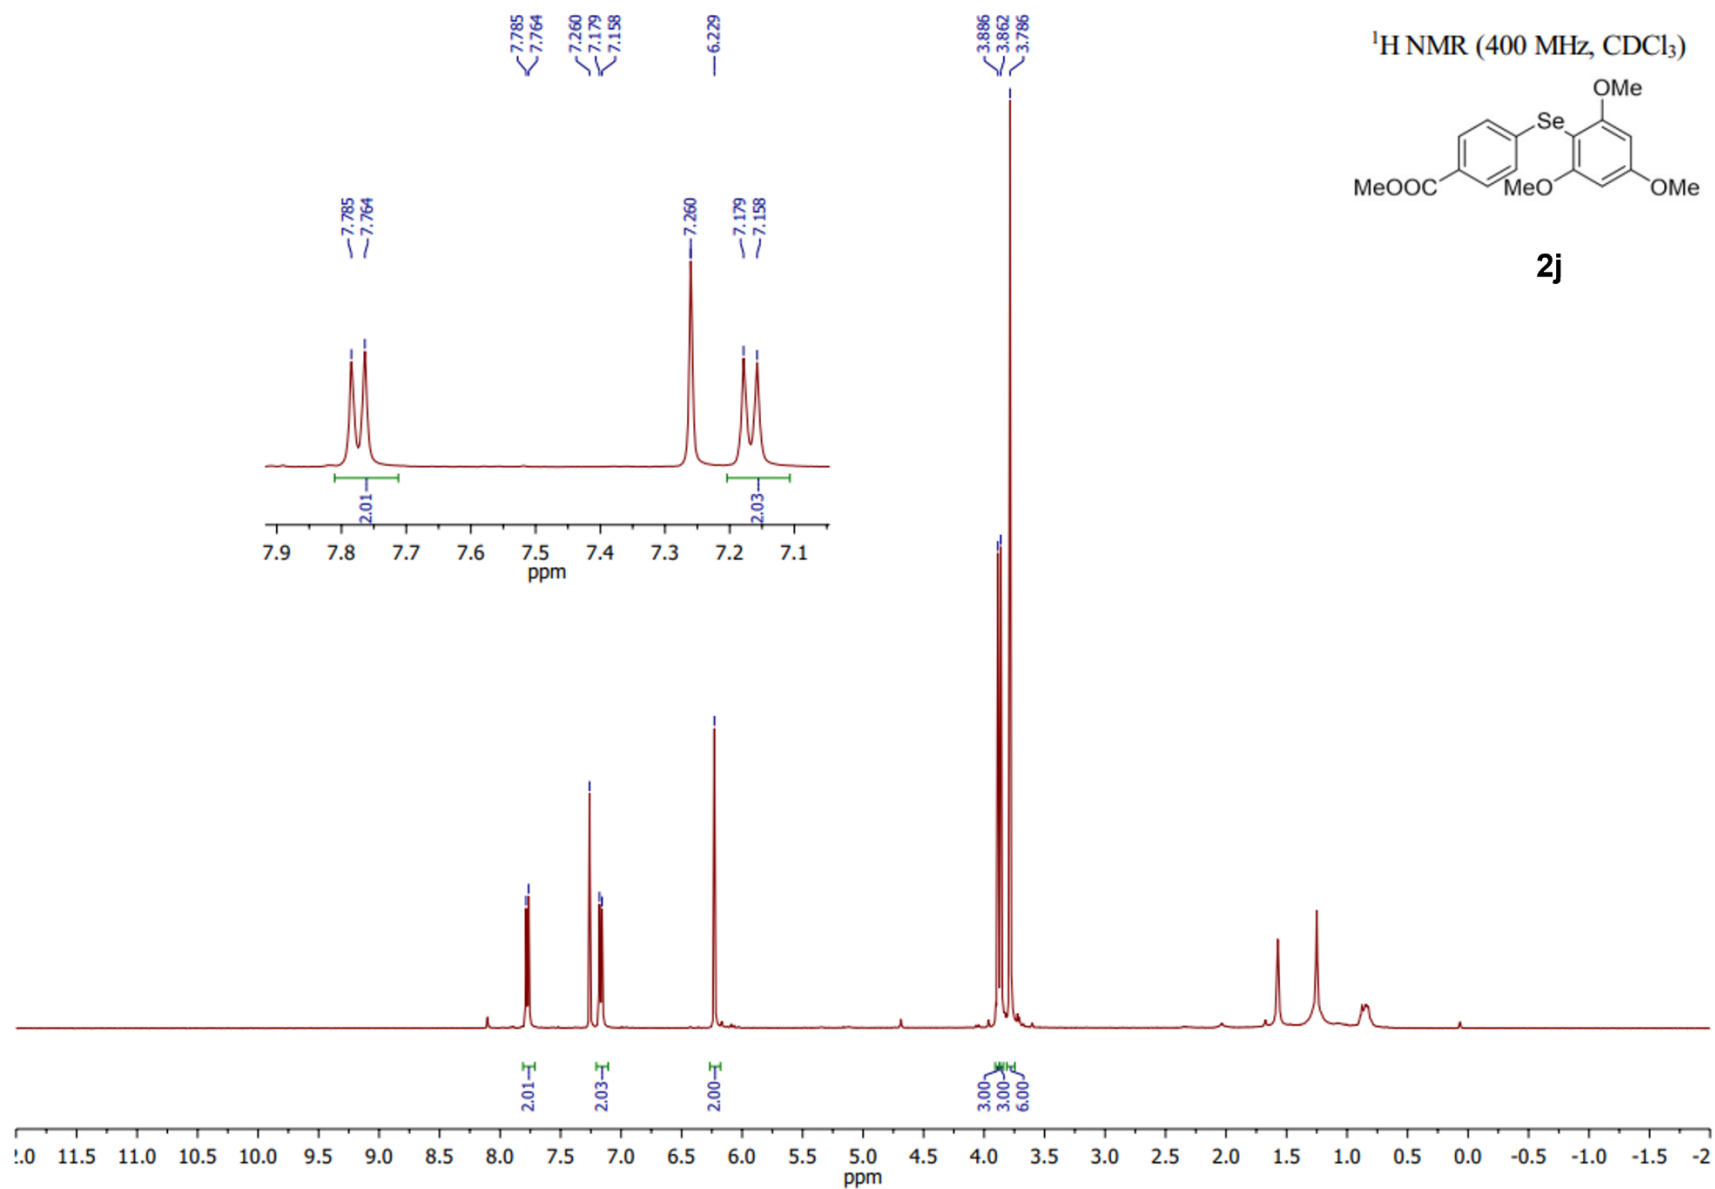

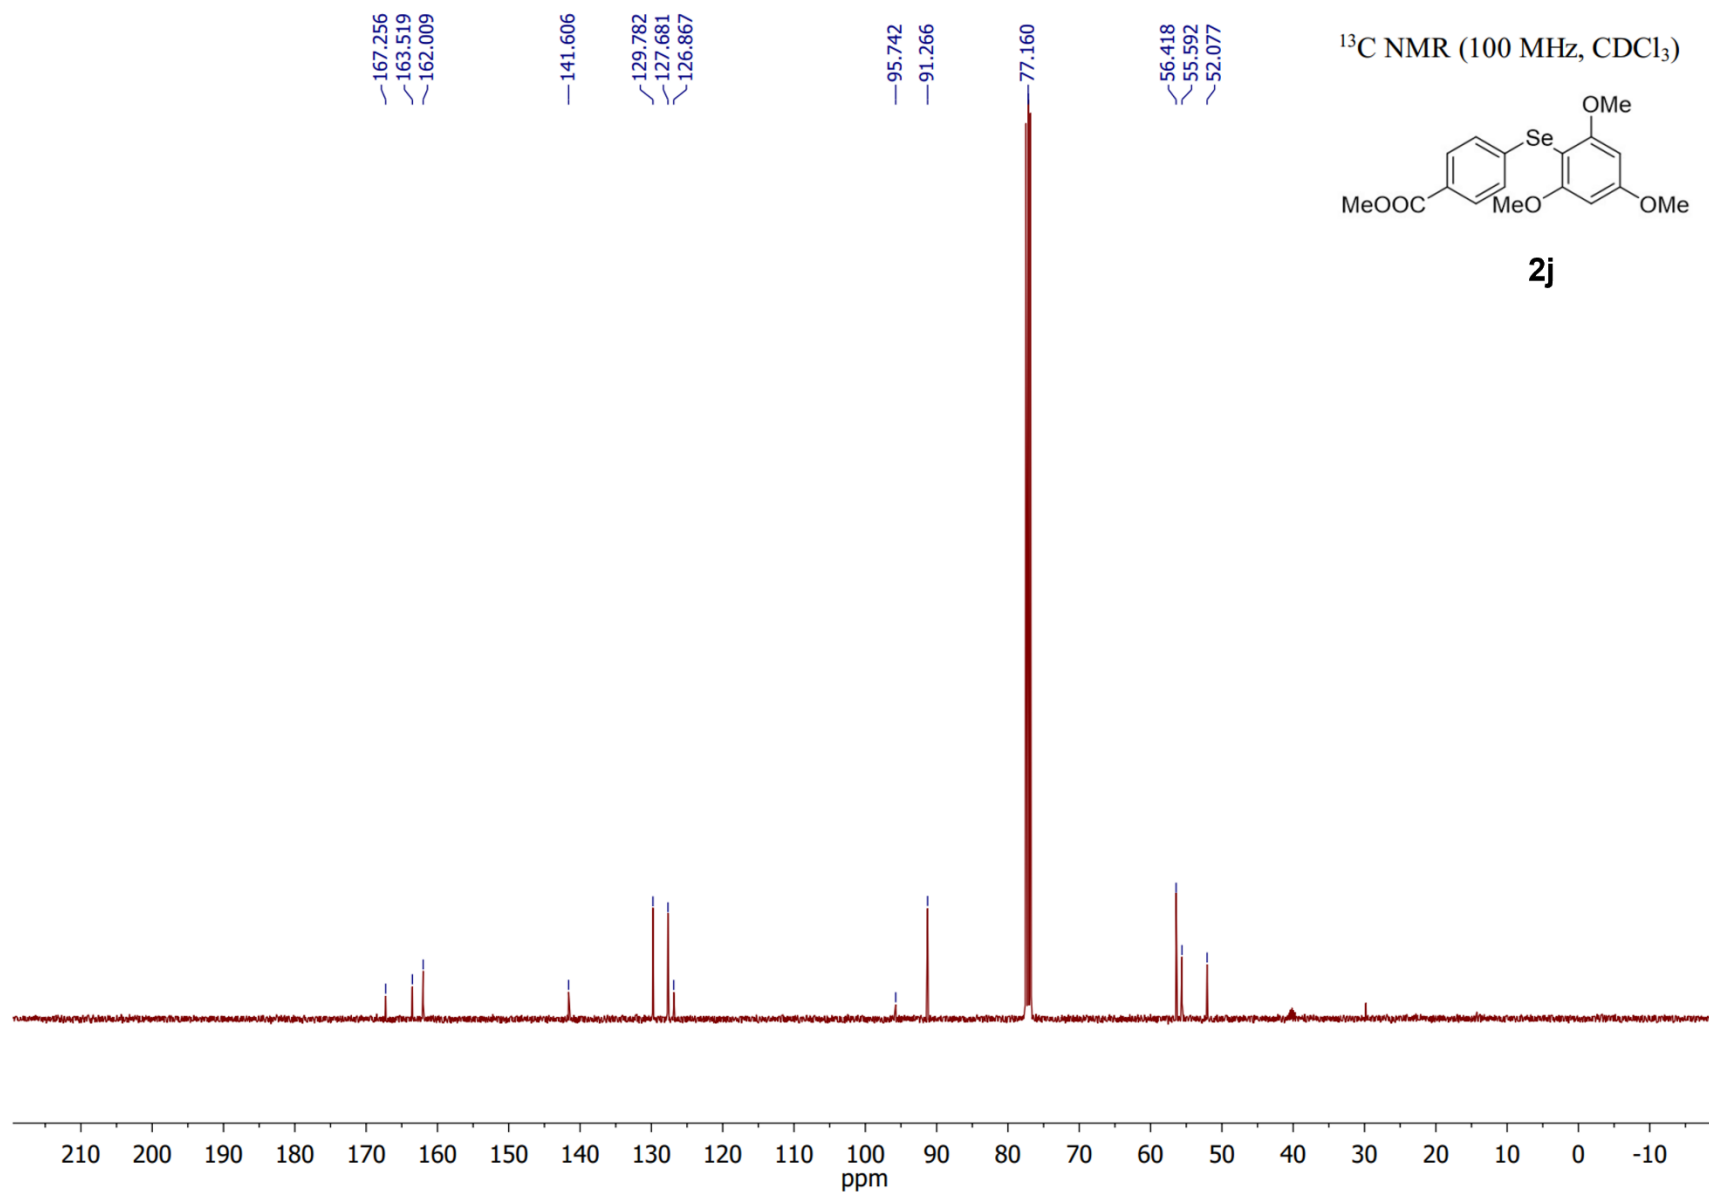

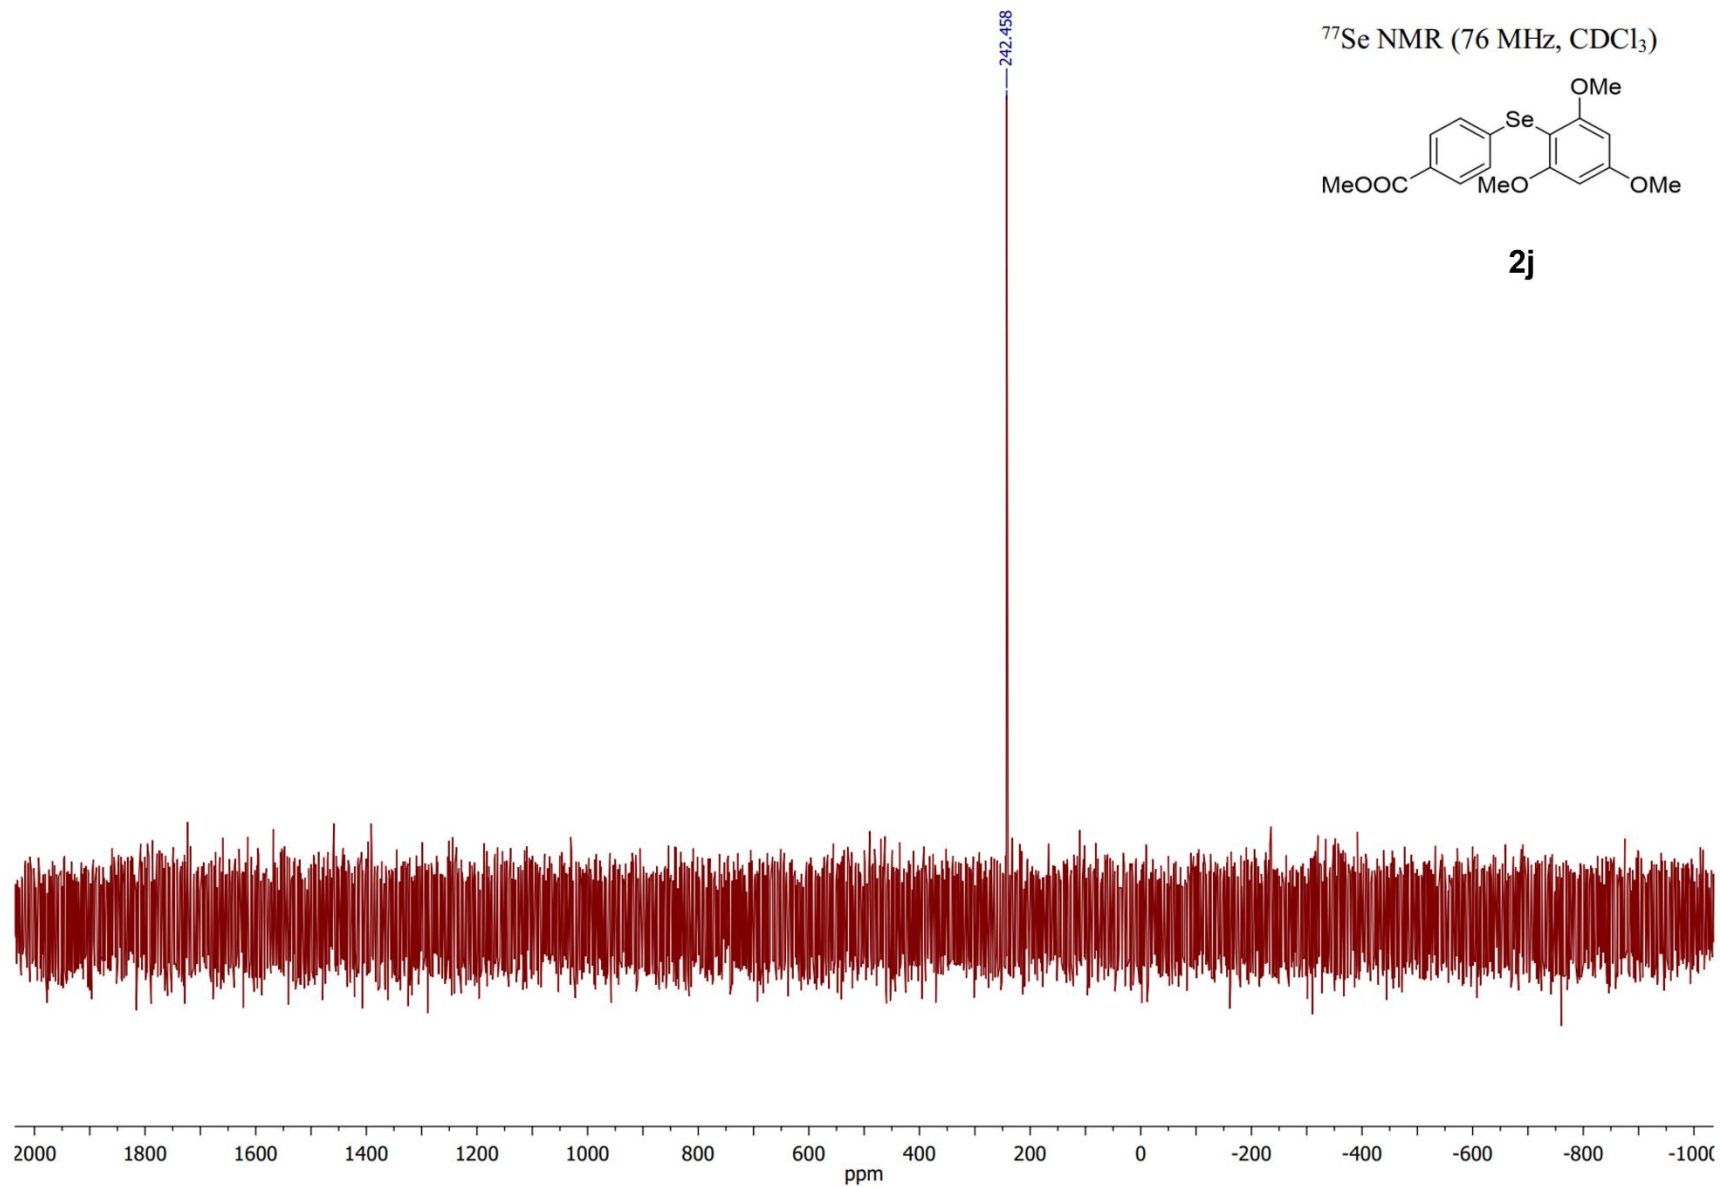

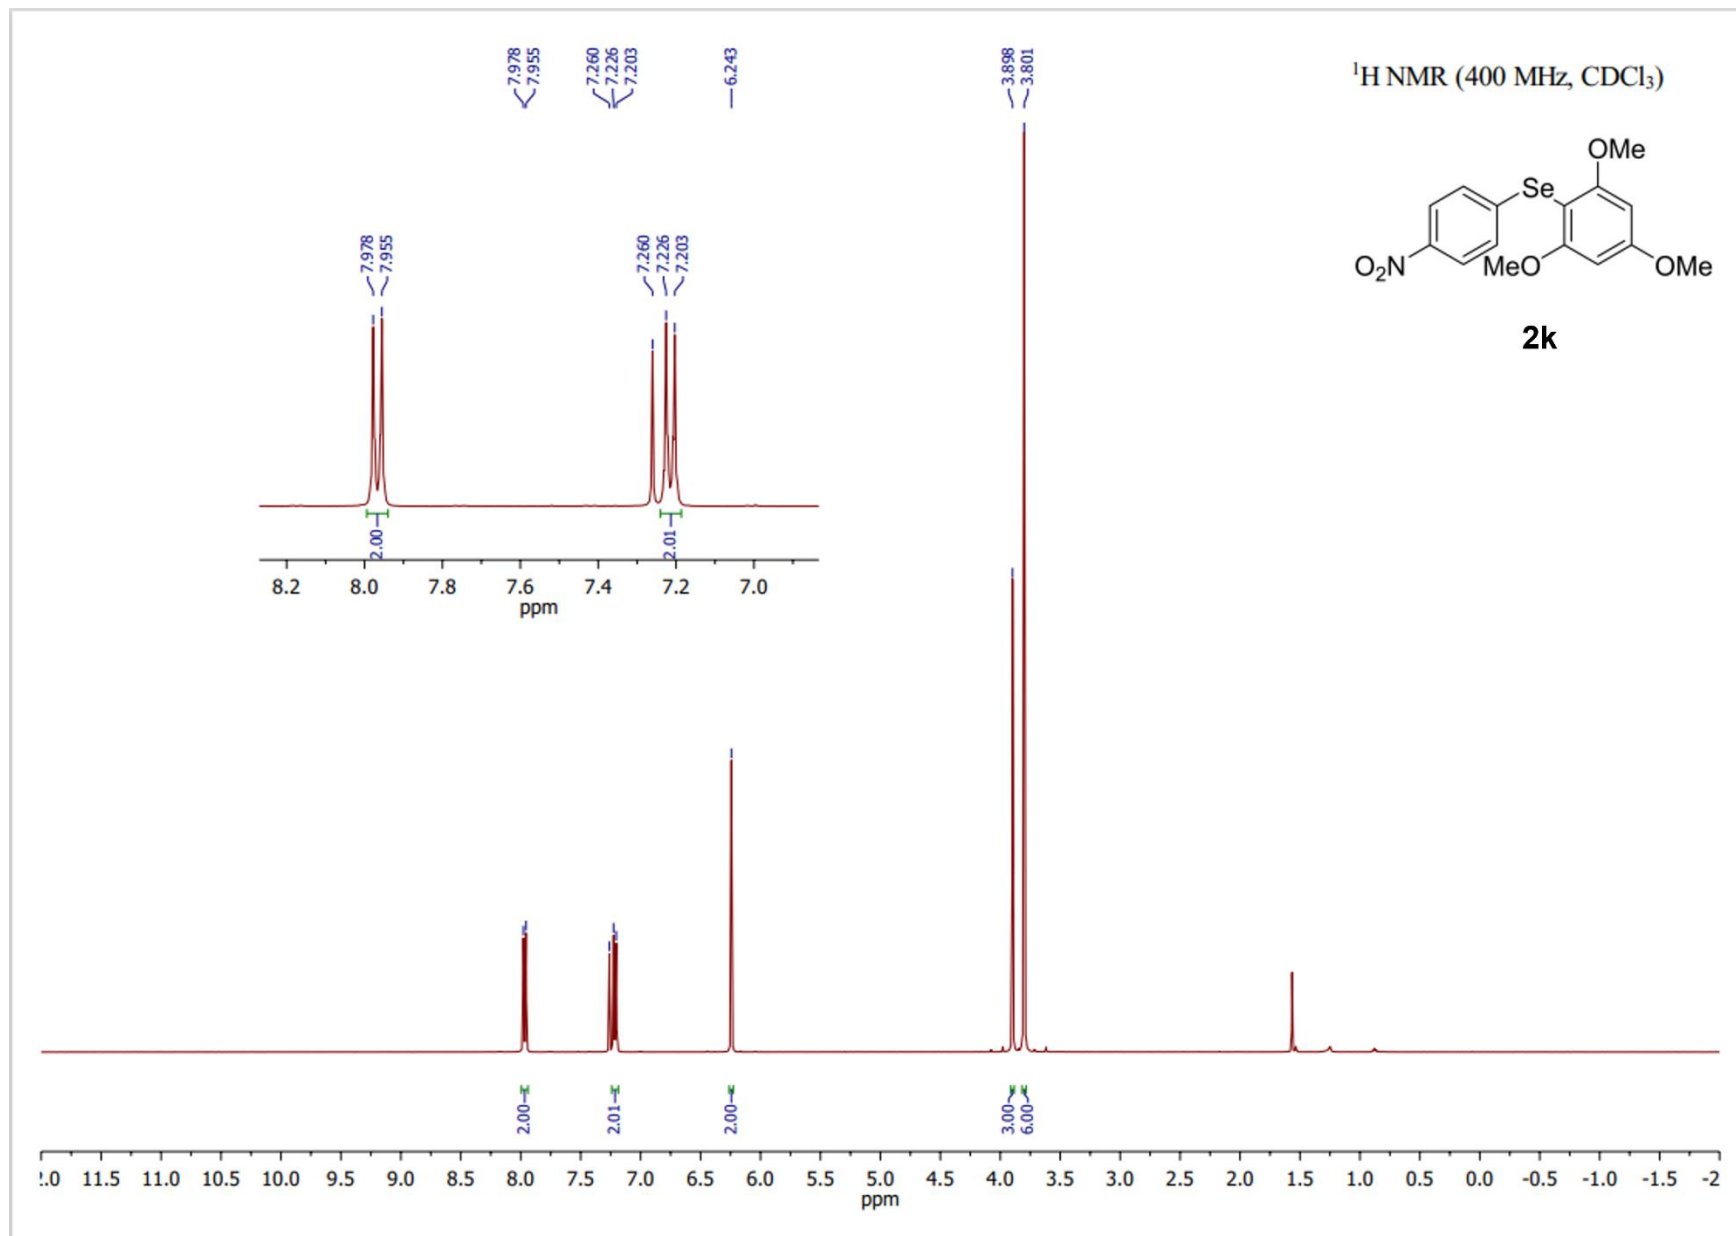

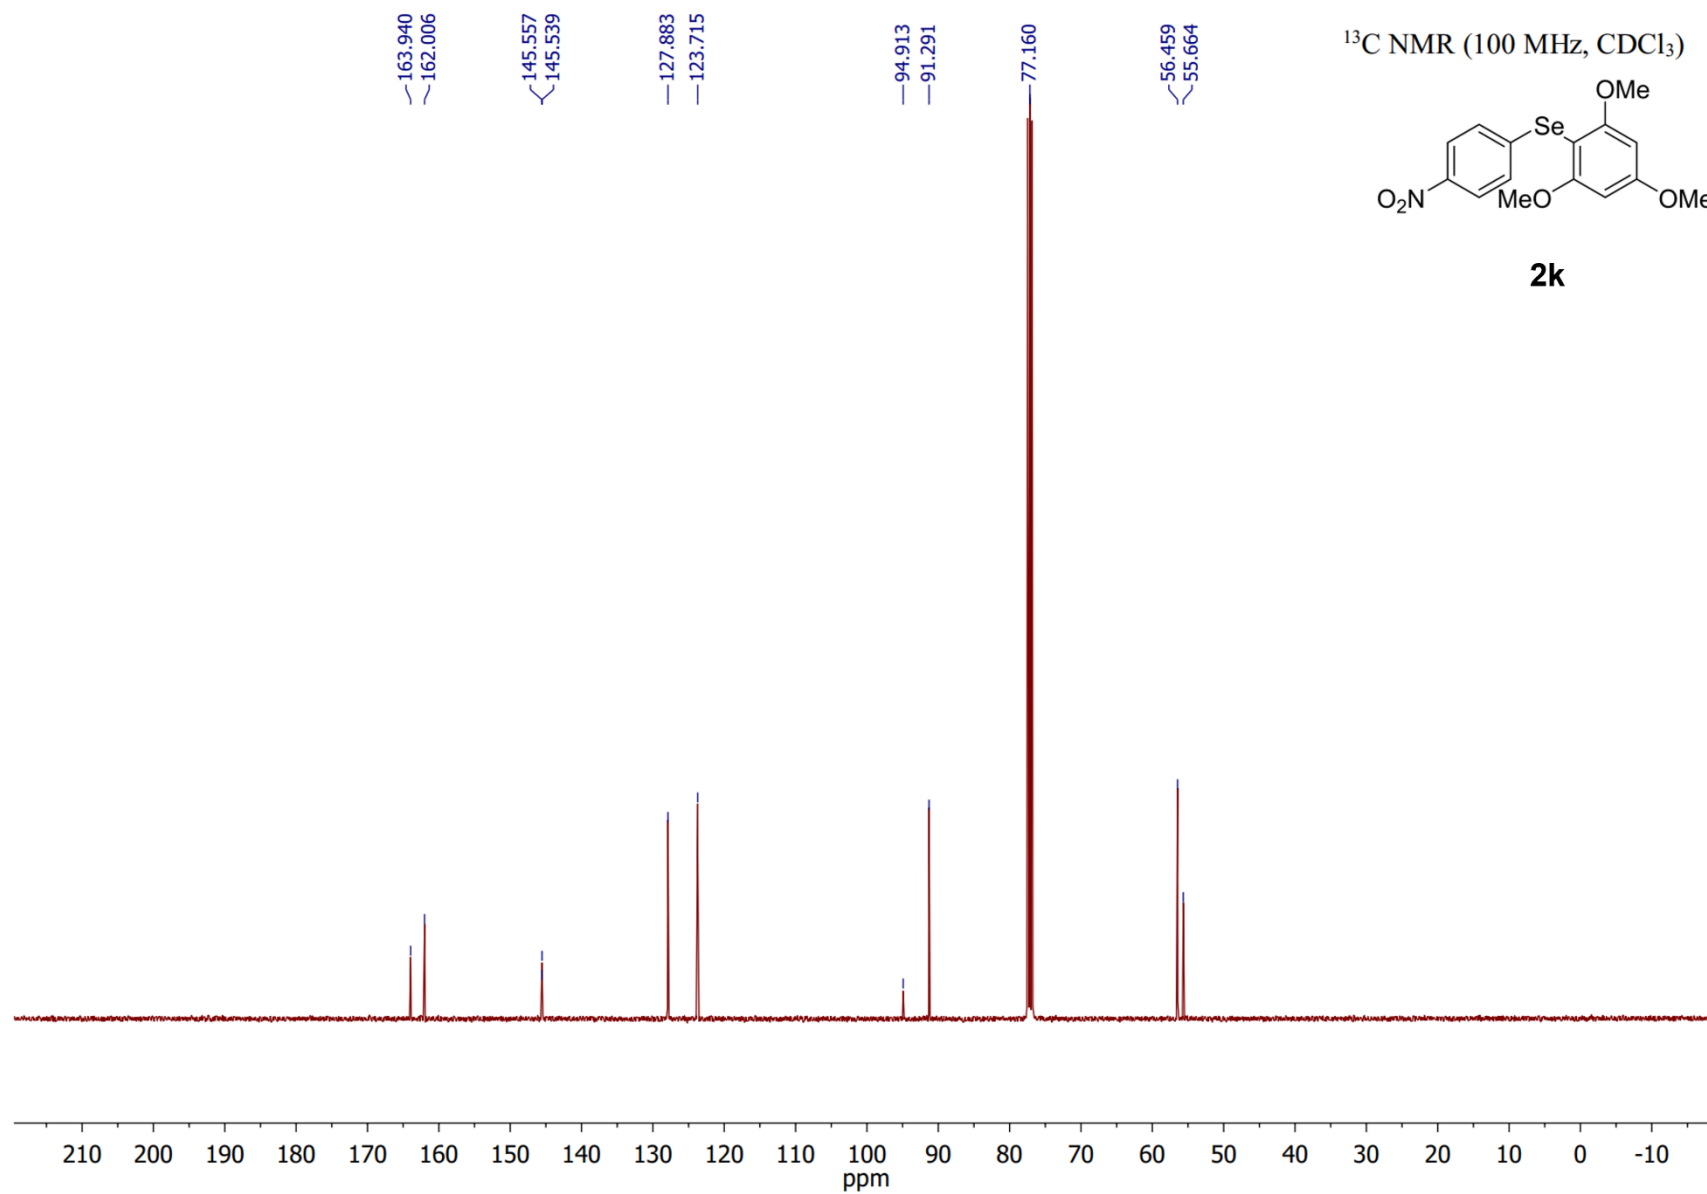

$^{77}\text{Se}$  NMR (76 MHz,  $\text{CDCl}_3$ )

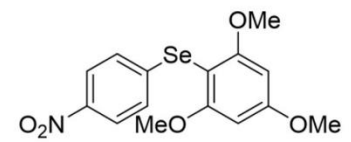

**2k**

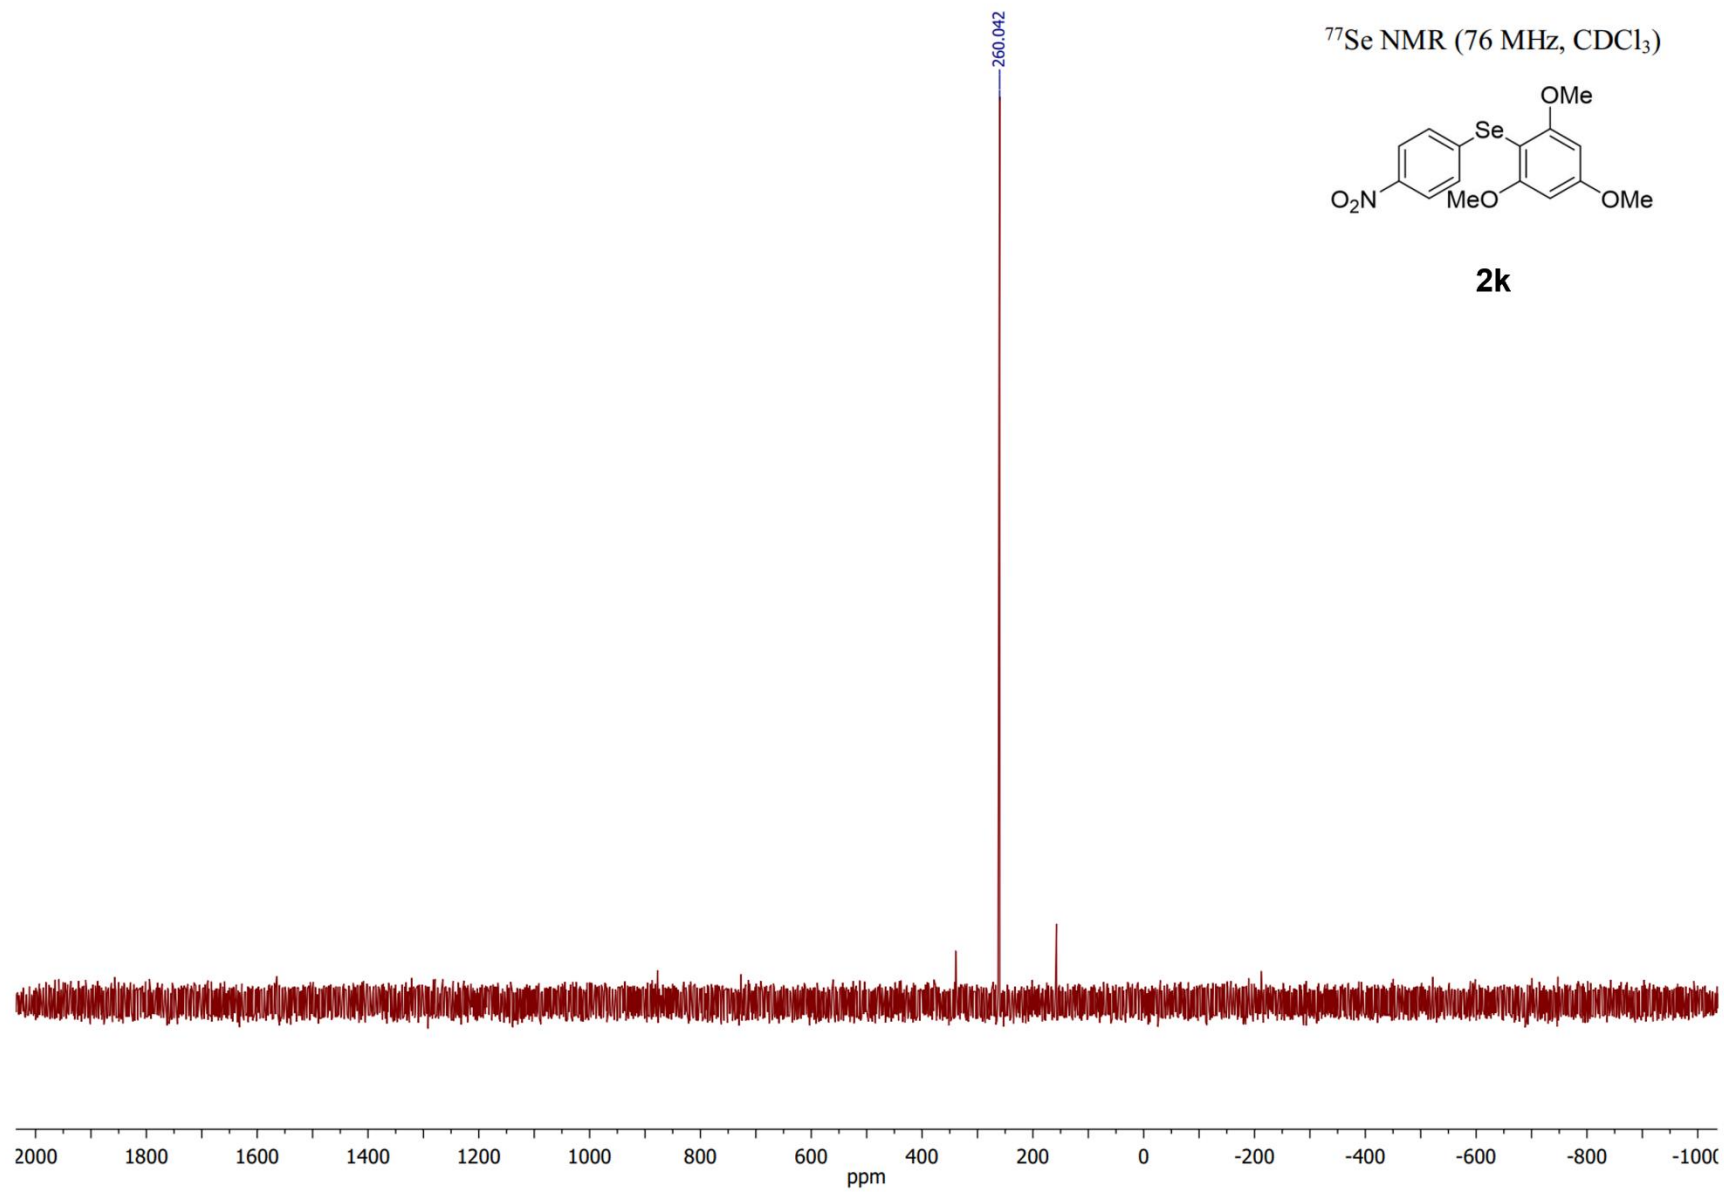

NMR spectra of **3a,b**

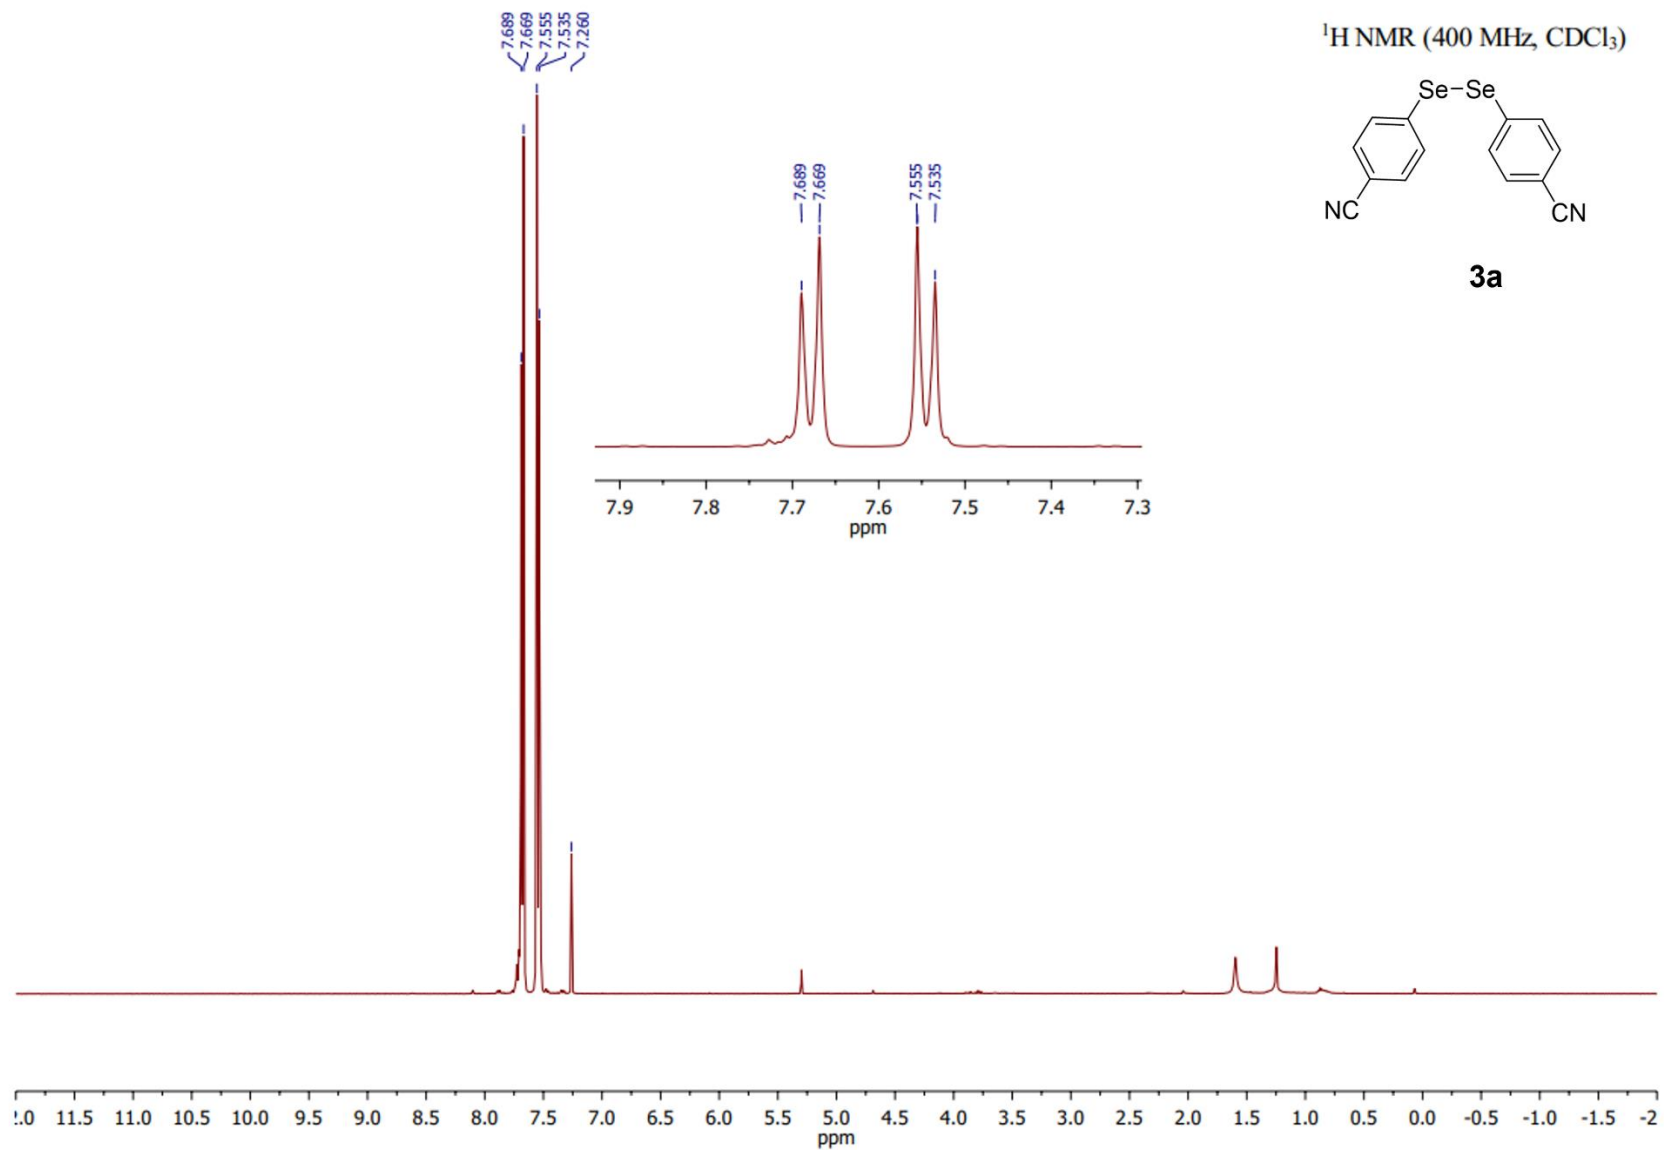

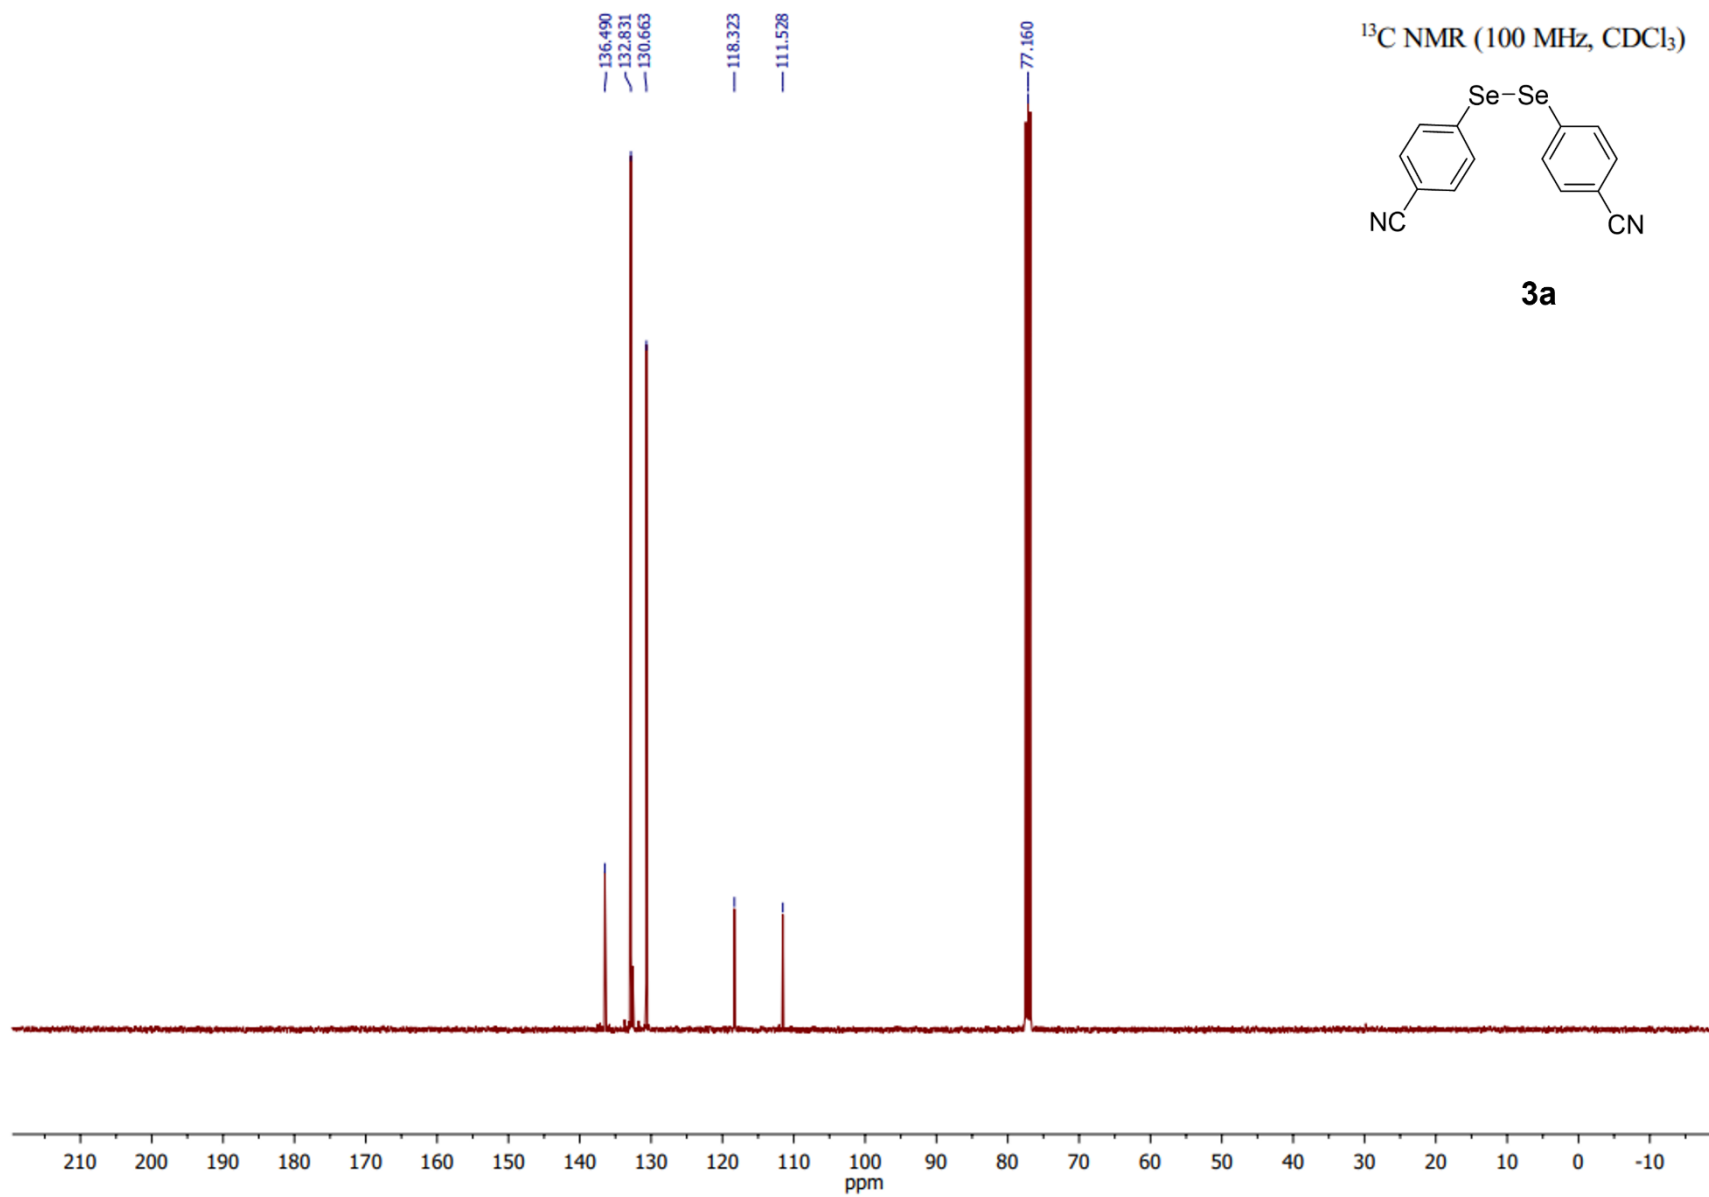



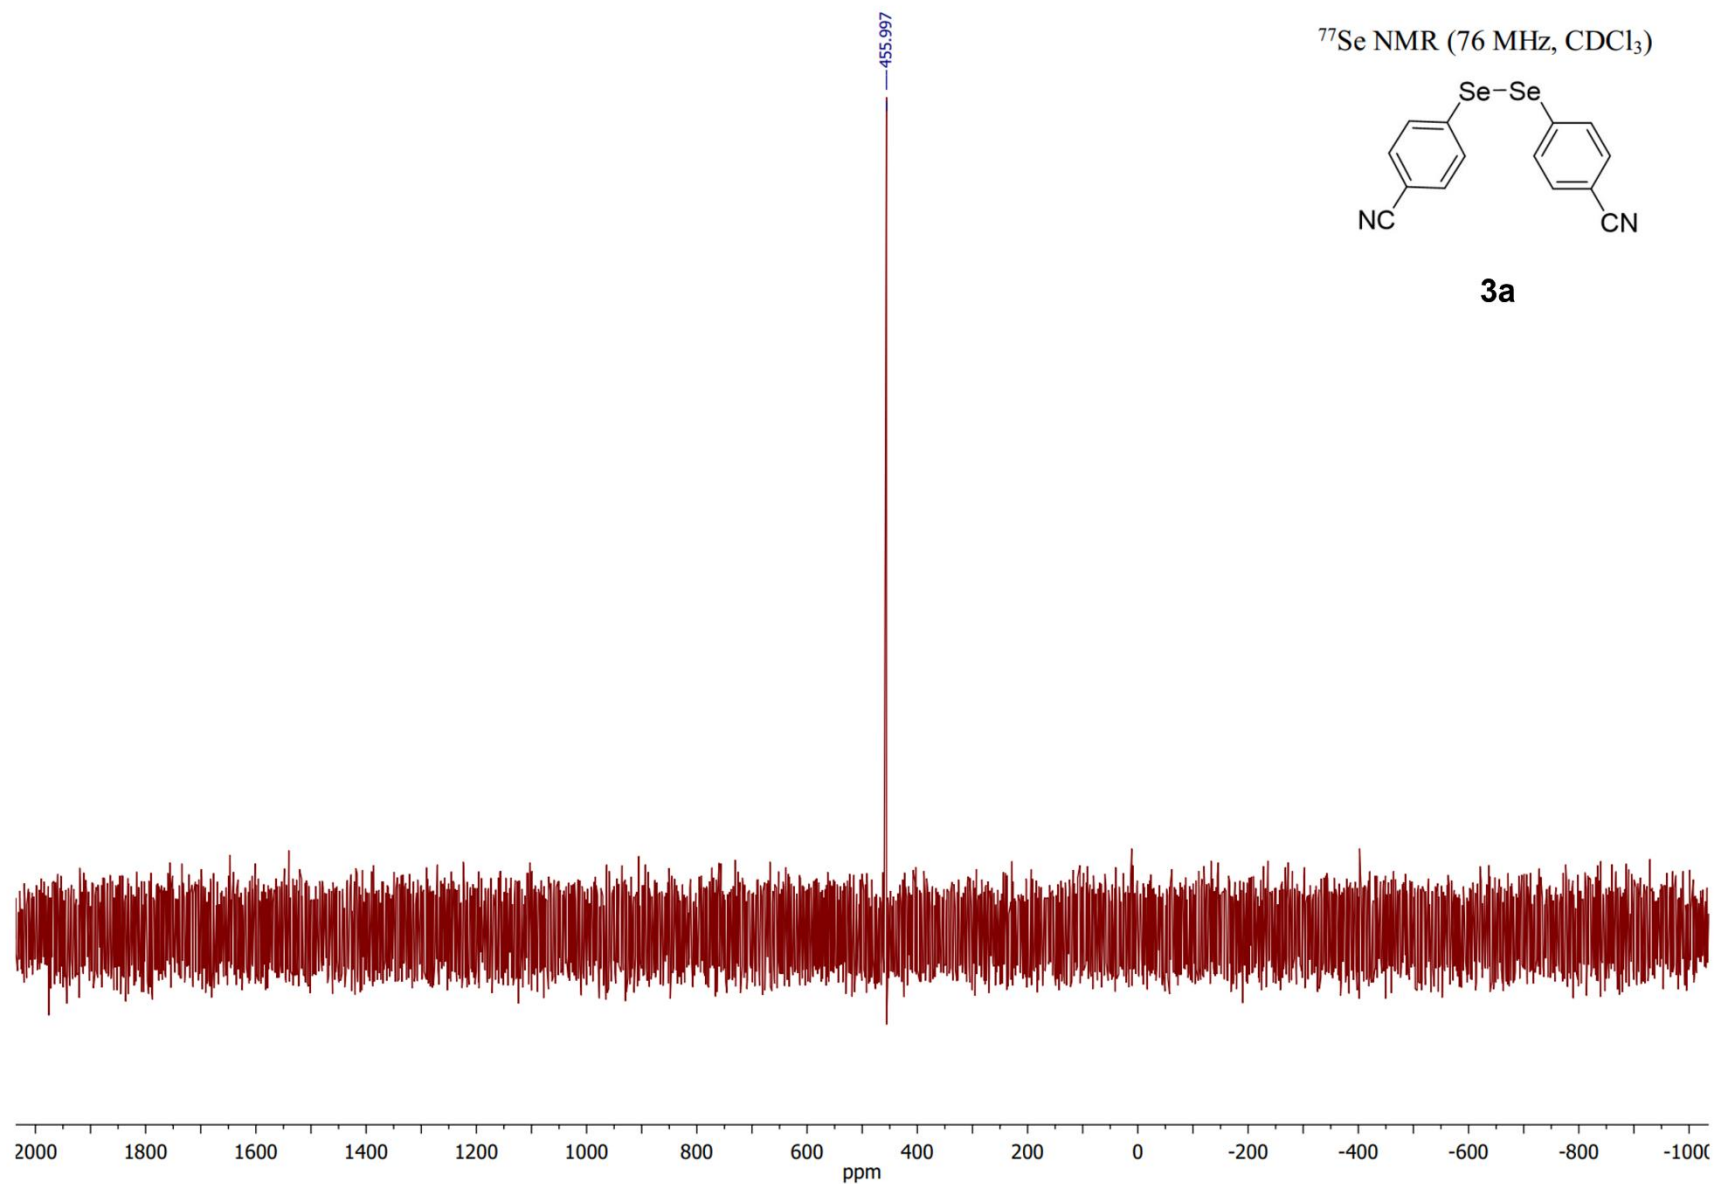

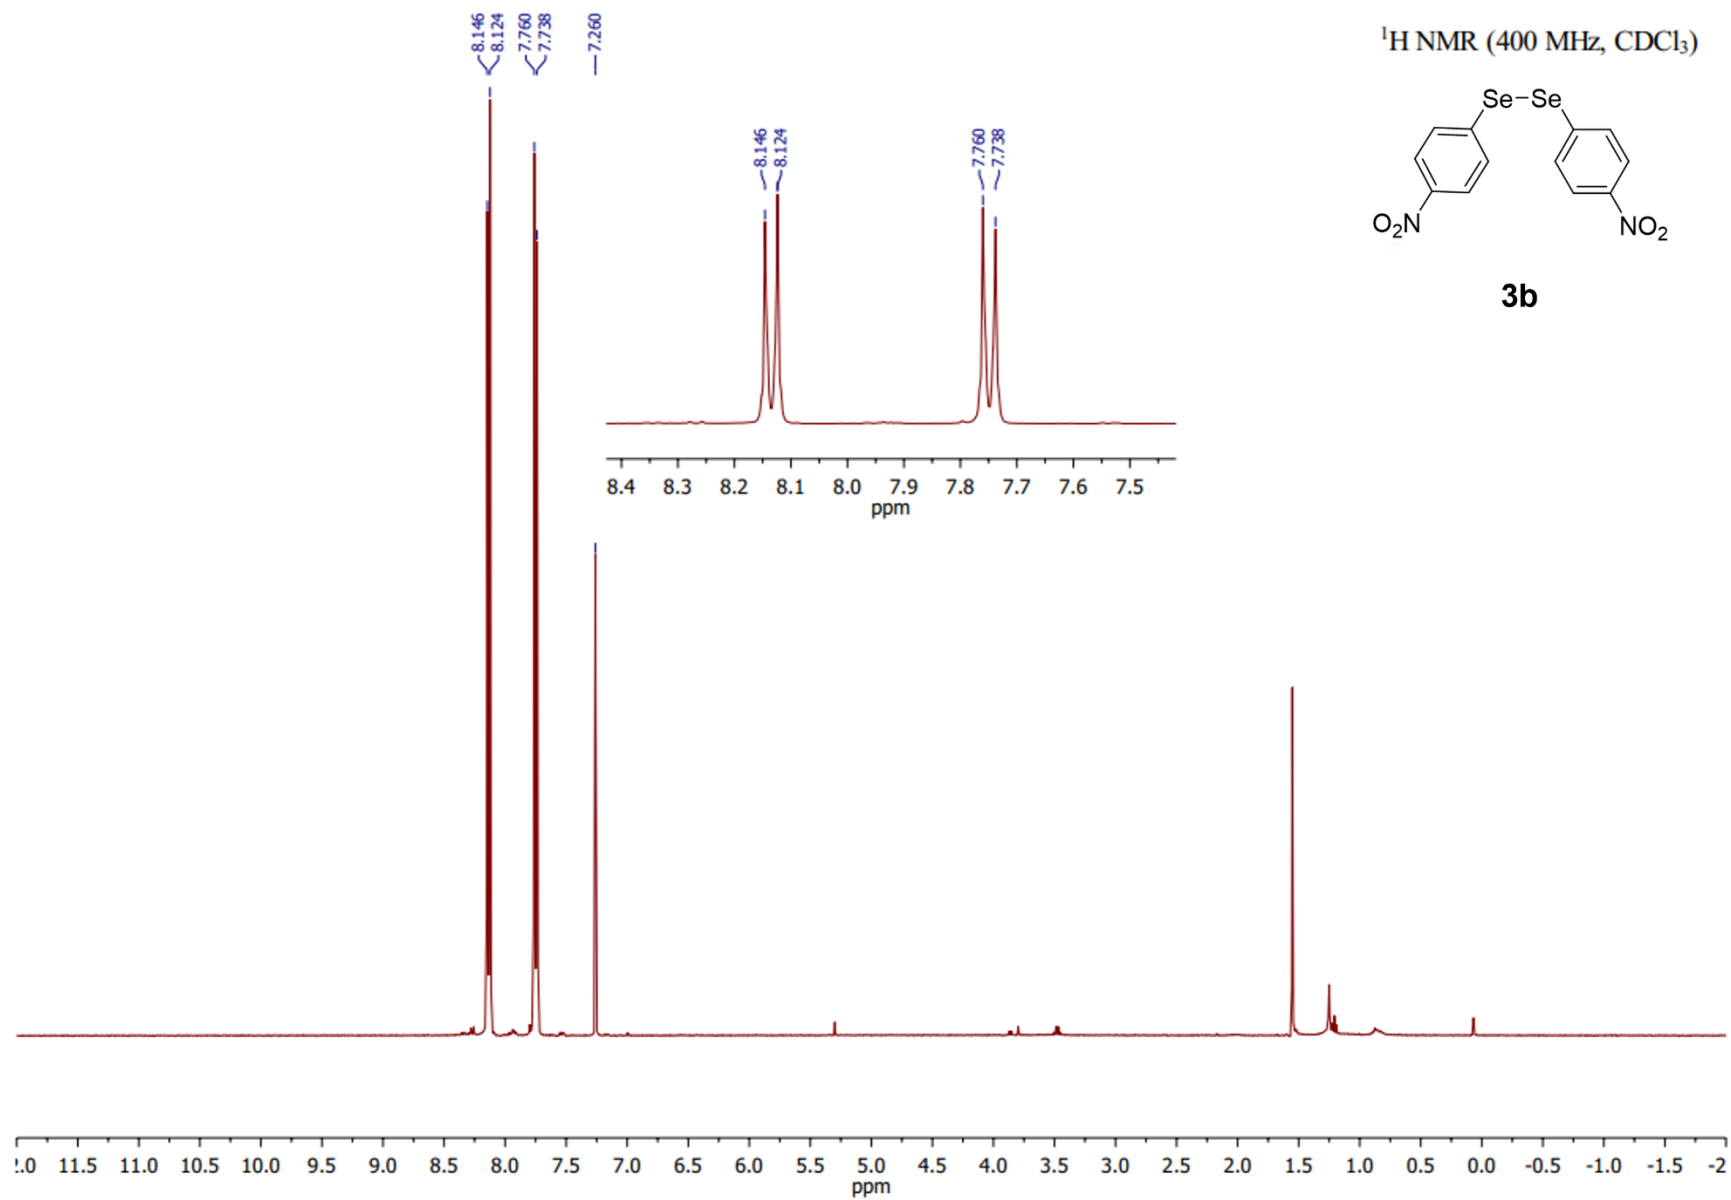

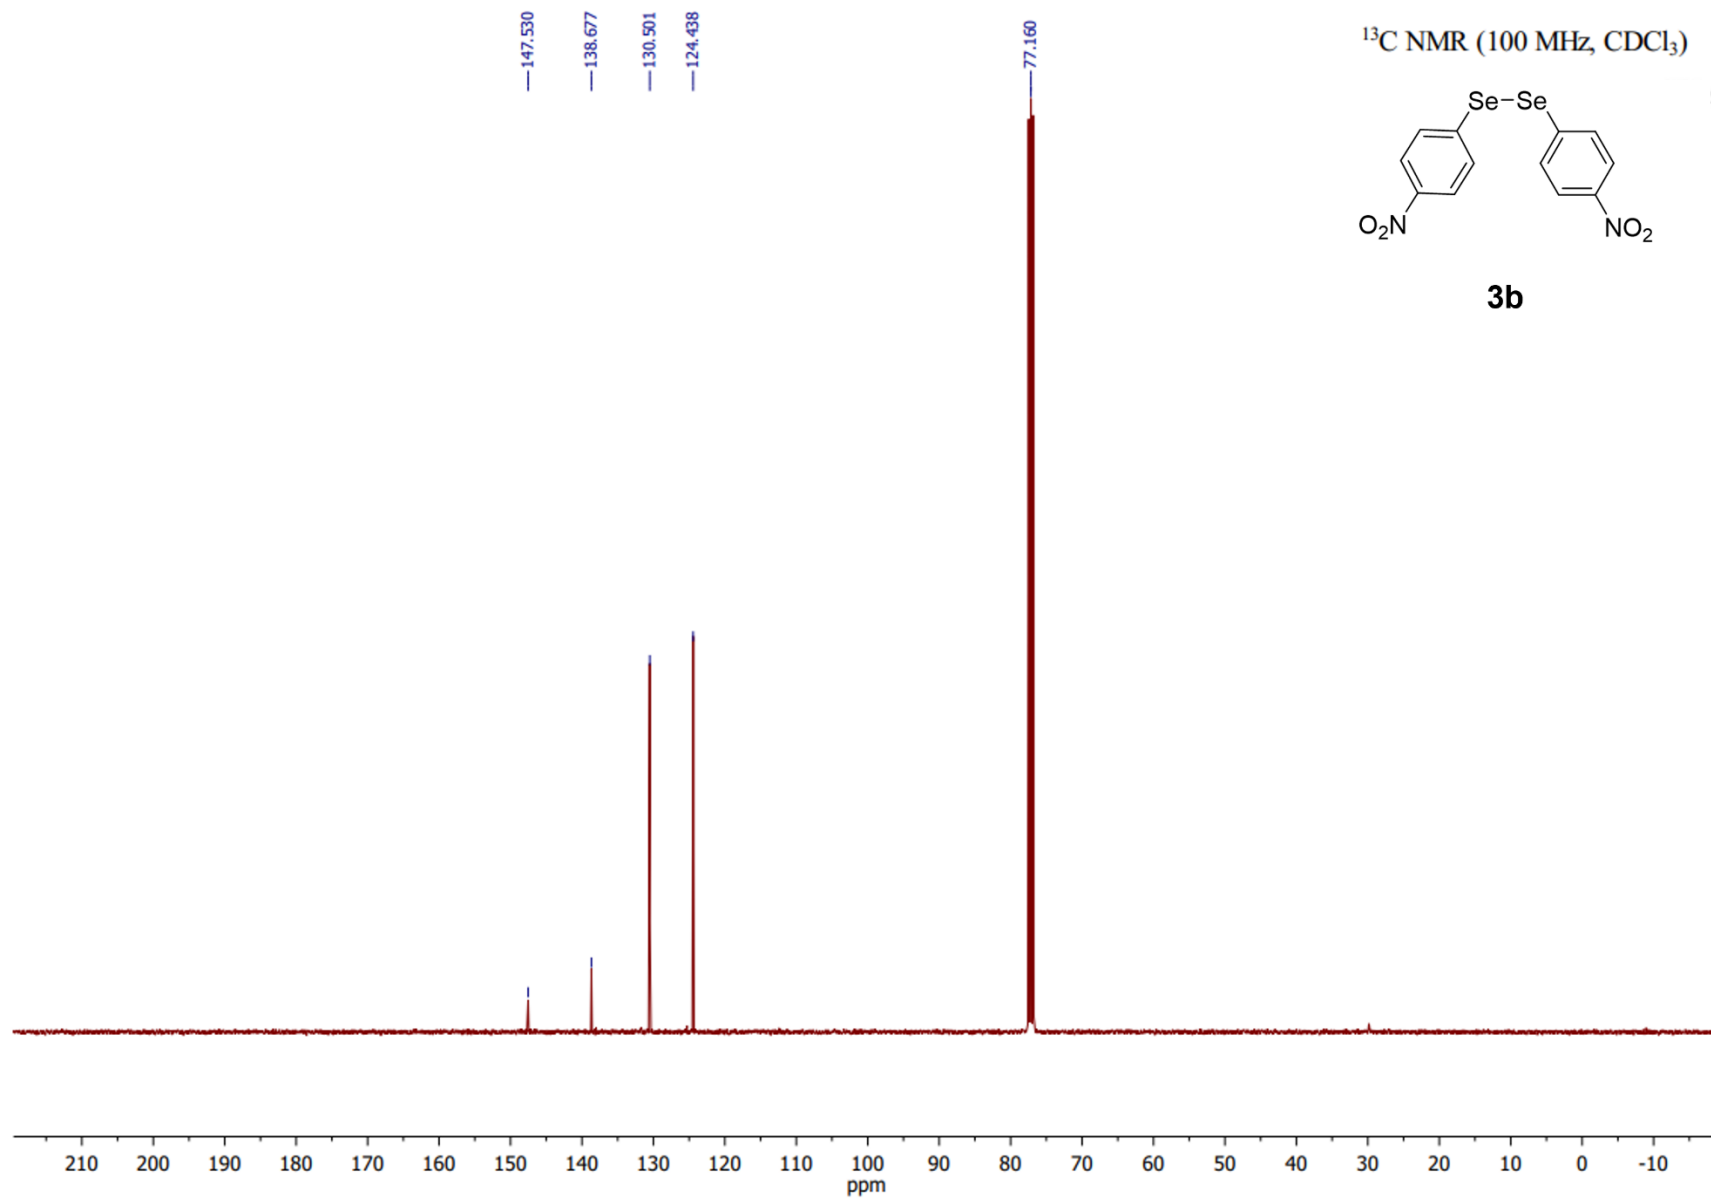

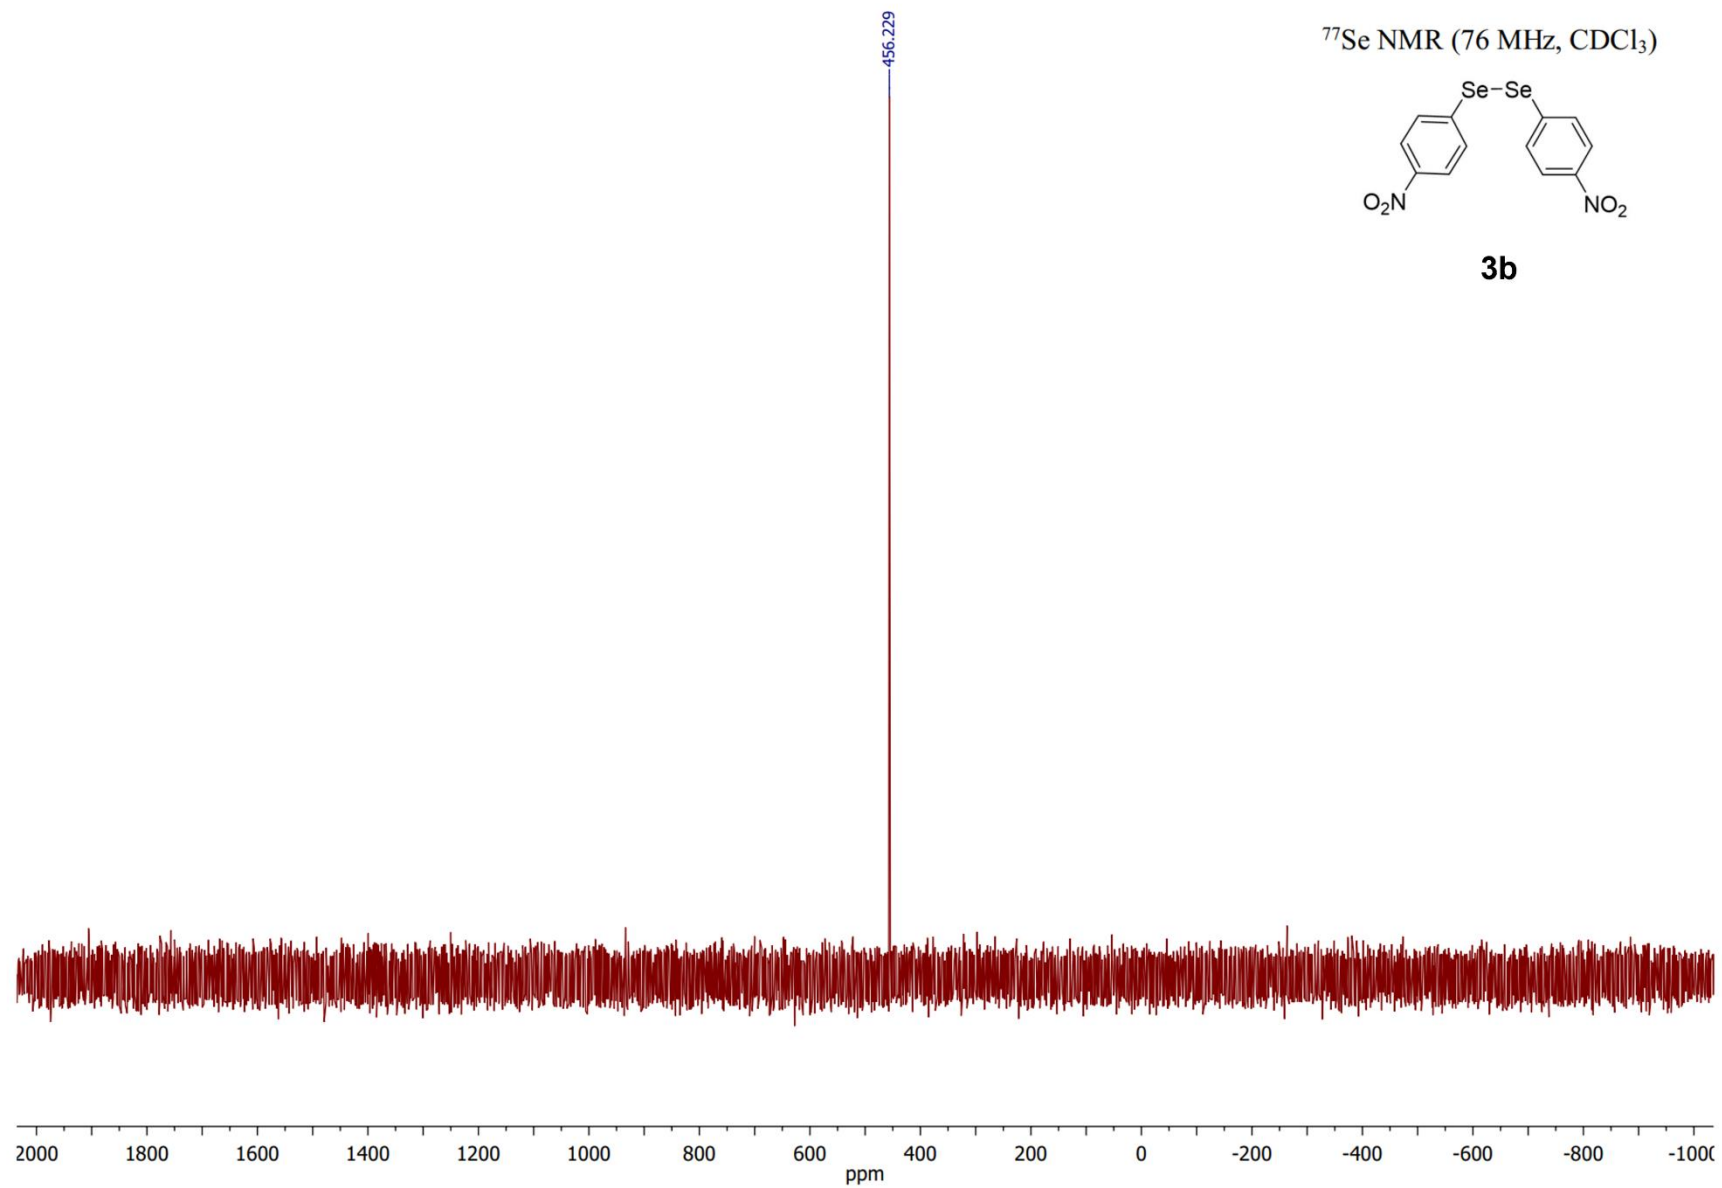

**Table S2.** Crystal data and structure refinement for **2g**, **2i**, and **3b**.

| Identification code                                     | <b>2g</b>                                                        | <b>2i</b>                                                        | <b>3b</b>                                                                    |
|---------------------------------------------------------|------------------------------------------------------------------|------------------------------------------------------------------|------------------------------------------------------------------------------|
| CCDC number                                             | 2250168                                                          | 2250169                                                          | 2250170                                                                      |
| Empirical formula                                       | C <sub>16</sub> H <sub>15</sub> F <sub>3</sub> O <sub>3</sub> Se | C <sub>16</sub> H <sub>15</sub> NO <sub>3</sub> Se               | C <sub>12</sub> H <sub>8</sub> N <sub>2</sub> O <sub>4</sub> Se <sub>2</sub> |
| Formula weight                                          | 391.24                                                           | 348.25                                                           | 402.12                                                                       |
| Temperature, K                                          | 100(2)                                                           | 100(2)                                                           | 100(2)                                                                       |
| Crystal system                                          | monoclinic                                                       | monoclinic                                                       | monoclinic                                                                   |
| Space group                                             | P2 <sub>1</sub> /c                                               | P2 <sub>1</sub> /c                                               | C2/c                                                                         |
| a, Å                                                    | 8.4142(2)                                                        | 14.6406(9)                                                       | 7.19910(10)                                                                  |
| b, Å                                                    | 25.3815(4)                                                       | 4.3593(3)                                                        | 14.1649(2)                                                                   |
| c, Å                                                    | 8.4387(2)                                                        | 23.6861(19)                                                      | 12.8571(2)                                                                   |
| α, °                                                    | 90                                                               | 90                                                               | 90                                                                           |
| β, °                                                    | 119.088(3)                                                       | 104.016(8)                                                       | 90.3270(10)                                                                  |
| γ, °                                                    | 90                                                               | 90                                                               | 90                                                                           |
| Volume, Å <sup>3</sup>                                  | 1574.90(7)                                                       | 1466.71(19)                                                      | 1311.08(3)                                                                   |
| Z                                                       | 4                                                                | 4                                                                | 4                                                                            |
| ρ <sub>calc</sub> , g/cm <sup>3</sup>                   | 1.650                                                            | 1.577                                                            | 2.037                                                                        |
| μ, mm <sup>-1</sup>                                     | 3.646                                                            | 3.554                                                            | 7.214                                                                        |
| F(000)                                                  | 784.0                                                            | 704.0                                                            | 776.0                                                                        |
| Crystal size, mm <sup>3</sup>                           | 0.2 × 0.18 × 0.15                                                | 0.21 × 0.18 × 0.15                                               | 0.2 × 0.18 × 0.17                                                            |
| Radiation                                               | Cu Kα (λ = 1.54184)                                              | Cu Kα (λ = 1.54184)                                              | Cu Kα (λ = 1.54184)                                                          |
| 2θ range for data collection, °                         | 6.966 to 134.99                                                  | 6.222 to 134.98                                                  | 12.498 to 159.478                                                            |
| Index ranges                                            | -10 ≤ h ≤ 10,<br>-29 ≤ k ≤ 30,<br>-8 ≤ l ≤ 10                    | -17 ≤ h ≤ 17,<br>-5 ≤ k ≤ 4,<br>-28 ≤ l ≤ 28                     | -9 ≤ h ≤ 6,<br>-17 ≤ k ≤ 17,<br>-16 ≤ l ≤ 16                                 |
| Reflections collected                                   | 18825                                                            | 25265                                                            | 3717                                                                         |
| Independent reflections                                 | 2812 [R <sub>int</sub> = 0.0495,<br>R <sub>sigma</sub> = 0.0299] | 2641 [R <sub>int</sub> = 0.1605,<br>R <sub>sigma</sub> = 0.0788] | 1350 [R <sub>int</sub> = 0.0178,<br>R <sub>sigma</sub> = 0.0148]             |
| Data/restraints/parameters                              | 2812/0/211                                                       | 2641/0/193                                                       | 1350/0/91                                                                    |
| Goodness-of-fit on F <sup>2</sup>                       | 1.257                                                            | 1.076                                                            | 1.040                                                                        |
| Final R indexes [I ≥ 2σ (I)]                            | R <sub>1</sub> = 0.0767,<br>wR <sub>2</sub> = 0.1803             | R <sub>1</sub> = 0.0709,<br>wR <sub>2</sub> = 0.1714             | R <sub>1</sub> = 0.0293,<br>wR <sub>2</sub> = 0.0817                         |
| Final R indexes [all data]                              | R <sub>1</sub> = 0.0778,<br>wR <sub>2</sub> = 0.1807             | R <sub>1</sub> = 0.0925,<br>wR <sub>2</sub> = 0.1883             | R <sub>1</sub> = 0.0300,<br>wR <sub>2</sub> = 0.0824                         |
| Largest diff. peak/hole, e <sup>-</sup> Å <sup>-3</sup> | 1.42/-0.85                                                       | 2.12/-0.92                                                       | 0.91/-0.79                                                                   |

## References

- 1 V. Carreras, A. H. Sandtorv and D. R. Stuart, *J. Org. Chem.*, 2017, **82**, 1279–1284.
- 2 G. M. Sheldrick, *Acta Crystallogr. Sect. A Found. Adv.*, 2015, **71**, 3–8.
- 3 G. M. Sheldrick, *Acta Crystallogr. Sect. C Struct. Chem.*, 2015, **71**, 3–8.
- 4 O. V. Dolomanov, L. J. Bourhis, R. J. Gildea, J. A. K. Howard and H. Puschmann, *J. Appl. Crystallogr.*, 2009, **42**, 339–341.
- 5 F. H. Allen and I. J. Bruno, *Acta Crystallogr. Sect. B Struct. Sci.*, 2010, **66**, 380–386.
- 6 N. S. Soldatova, P. S. Postnikov, M. S. Yusubov and T. Wirth, *European J. Org. Chem.*, 2019, **2019**, 2081–2088.
- 7 A. H. Sandtorv and D. R. Stuart, *Angew. Chemie Int. Ed.*, 2016, **55**, 15812–15815.
- 8 P. Kalaramna and A. Goswami, *J. Org. Chem.*, 2021, **86**, 9317–9327.
- 9 M. S. Silva, D. Alves, D. Hartwig, R. G. Jacob, G. Perin and E. J. Lenardão, *Asian J. Org. Chem.*, 2021, **10**, 91–128.
- 10 D. Kommula, Q. Li, S. Ning, W. Liu, Q. Wang and Z. K. Zhao, *Synth. Commun.*, 2020, **50**, 1026–1034.
- 11 L. Syper and J. Mlochowski, *Tetrahedron*, 1988, **44**, 6119–6130.
